# Supplementary material for: The risk of hospitalization for respiratory tract infection (RTI) in children who are treated with high-dose IVIG in Kawasaki Disease: a nationwide population-based matched cohort study
Source: PeerJ. 2018 Mar 22;6:e4539. doi: 10.7717/peerj.4539 (PMC5866914; doi:10.7717/peerj.4539)
Supplement: Supplemental Information 1 [file peerj-06-4539-s001.xlsx]

## Sheet: zz-minimal dataset
SerialNum	BYgroup	Sex	Age	Preterm	Heartdiz	asthma	AllergicR	AtopicDer	PreResp	Prepneu	PreAOM	PreBroncho	AResp	APneuAOM	Apneu	AAOM	ABroncho	KWD	enddate	ALLResp365TimeM	pneuTimeM	AOMTimeM	bronchoTimeM	@1MALLResp365TimeM	@1MpneuTimeM	@1MAOMTimeM	@1MbronchoTimeM	@05MALLResp365TimeM	@05MpneuTimeM	@05MAOMTimeM	@05MbronchoTimeM
1	2003	1	5.9932	0	0	0	0	0	1	1	1	1	1	0	0	0	1	1	2013/12/31	60.8	60.8	60.8	60.8	0	0	0	0	0	0	0	0
2	2003	0	5.9932	0	0	0	0	0	1	0	0	1	0	0	0	0	0	0	2013/12/31	60.8667	60.8667	60.8667	60.8667	0	0	0	0	0	0	0	0
3	2003	1	5.9932	0	0	0	0	0	0	0	0	0	0	0	0	0	0	0	2013/12/31	60.9333	60.9333	60.9333	60.9333	0	0	0	0	0	0	0	0
4	2000	1	5.9932	0	0	0	0	0	0	0	0	0	0	0	0	0	0	0	2013/12/31	87	87	87	87	0	0	0	0	0	0	0	0
5	2000	0	5.9932	0	0	0	0	0	0	0	0	0	0	0	0	0	0	1	2013/12/31	95.3333	95.3333	95.3333	95.3333	0	0	0	0	0	0	0	0
6	1999	0	5.9904	0	0	1	0	0	1	1	1	1	1	1	0	1	0	1	2013/12/31	103.4	103.4	103.4	103.4	0	0	0	0	0	0	0	0
7	1999	1	5.9904	0	0	0	0	0	0	0	0	0	0	0	0	0	0	0	2013/12/31	103.533	103.533	103.533	103.533	0	0	0	0	0	0	0	0
8	1999	1	5.9849	0	0	0	0	0	1	1	1	0	0	0	0	0	0	1	2013/12/31	106.4	106.4	106.4	106.4	0	0	0	0	0	0	0	0
9	1997	1	5.9849	0	0	0	0	0	0	0	0	0	0	0	0	0	0	1	2013/12/31	125.667	125.667	125.667	125.667	0	0	0	0	0	0	0	0
10	2004	1	5.9713	0	0	0	0	0	1	1	0	0	1	1	0	1	0	1	2013/12/31	42.7	42.7	42.7	42.7	0	0	0	0	0	0	0	0
11	1998	1	5.9603	0	0	0	0	0	0	0	0	0	0	0	0	0	0	1	2013/12/31	117.033	117.033	117.033	117.033	0	0	0	0	0	0	0	0
12	1998	1	5.9603	0	0	0	0	0	1	1	0	1	0	0	0	0	0	0	2013/12/31	117.133	117.133	117.133	117.133	0	0	0	0	0	0	0	0
13	2005	1	5.9576	0	0	0	0	0	0	0	0	0	0	0	0	0	0	1	2013/12/31	26.7667	26.7667	26.7667	26.7667	0	0	0	0	0	0	0	0
14	2005	1	5.9576	0	0	0	0	0	0	0	0	0	0	0	0	0	0	0	2013/12/31	26.8333	26.8333	26.8333	26.8333	0	0	0	0	0	0	0	0
15	2002	1	5.9466	0	0	0	0	0	0	0	0	0	0	0	0	0	0	0	2013/12/31	64.3667	64.3667	64.3667	64.3667	0	0	0	0	0	0	0	0
16	2002	1	5.9466	0	0	0	0	0	0	0	0	0	0	0	0	0	0	1	2013/12/31	64.4	64.4	64.4	64.4	0	0	0	0	0	0	0	0
17	2002	1	5.9466	0	0	0	0	0	0	0	0	0	0	0	0	0	0	0	2013/12/31	64.4667	64.4667	64.4667	64.4667	0	0	0	0	0	0	0	0
18	2000	1	5.9466	0	0	0	0	0	0	0	0	0	0	0	0	0	0	1	2013/12/31	97.5333	97.5333	97.5333	97.5333	0	0	0	0	0	0	0	0
19	2000	0	5.9466	0	0	0	0	0	0	0	0	0	0	0	0	0	0	0	2013/12/31	97.9333	97.9333	97.9333	97.9333	0	0	0	0	0	0	0	0
20	2006	0	5.9439	0	0	0	0	0	0	0	0	0	0	0	0	0	0	1	2013/12/31	18.7667	18.7667	18.7667	18.7667	0	0	0	0	0	0	0	0
21	1998	0	5.9439	0	0	0	0	0	0	0	0	0	0	0	0	0	0	1	2013/12/31	119.4	119.4	119.4	119.4	0	0	0	0	0	0	0	0
22	2005	0	5.9384	0	0	0	0	0	0	0	0	0	0	0	0	0	0	1	2013/12/31	32.0333	32.0333	32.0333	32.0333	0	0	0	0	0	0	0	0
23	2005	1	5.9384	0	0	0	0	0	1	1	0	0	0	0	0	0	0	0	2013/12/31	32.1667	32.1667	32.1667	32.1667	0	0	0	0	0	0	0	0
24	1998	1	5.9357	0	0	0	0	0	0	0	0	0	0	0	0	0	0	1	2013/12/31	121.267	121.267	121.267	121.267	0	0	0	0	0	0	0	0
25	1998	1	5.9357	0	0	0	0	0	0	0	0	0	1	1	0	1	0	0	2013/12/31	121.367	121.367	121.367	121.367	0	0	0	0	0	0	0	0
26	1998	1	5.9357	0	0	0	0	0	0	0	0	0	1	1	0	1	0	0	2013/12/31	121.367	121.367	121.367	121.367	0	0	0	0	0	0	0	0
27	2001	0	5.9329	0	0	0	0	0	1	1	0	0	0	0	0	0	0	0	2013/12/31	4.0333	4.0333	82.8667	82.8667	1	1	0	0	1	1	0	0
28	2001	1	5.9329	0	0	0	0	0	0	0	0	0	0	0	0	0	0	1	2013/12/31	82.8667	82.8667	82.8667	82.8667	0	0	0	0	0	0	0	0
29	2001	1	5.9247	0	0	0	0	0	1	1	0	0	0	0	0	0	0	1	2013/12/31	79.8	79.8	79.8	79.8	0	0	0	0	0	0	0	0
30	2003	0	5.922	0	0	0	0	0	0	0	0	0	1	1	0	1	0	1	2013/12/31	60.5667	60.5667	60.5667	60.5667	0	0	0	0	0	0	0	0
31	2003	1	5.922	0	0	0	0	0	0	0	0	0	0	0	0	0	0	0	2013/12/31	60.7333	60.7333	60.7333	60.7333	0	0	0	0	0	0	0	0
32	2006	1	5.9192	0	0	0	0	0	1	1	0	0	0	0	0	0	0	1	2013/12/31	17	17	17	17	0	0	0	0	0	0	0	0
33	1997	1	5.9165	0	0	0	0	0	0	0	0	0	0	0	0	0	0	1	2013/12/31	133.633	133.633	133.633	133.633	0	0	0	0	0	0	0	0
34	1997	1	5.9165	0	0	0	0	0	1	1	0	0	1	0	0	0	1	0	2013/12/31	133.733	133.733	133.733	133.733	0	0	0	0	0	0	0	0
35	1997	1	5.9165	0	0	0	0	0	0	0	0	0	0	0	0	0	0	0	2013/12/31	133.733	133.733	133.733	133.733	0	0	0	0	0	0	0	0
36	1997	1	5.9165	0	0	0	0	0	1	0	1	0	0	0	0	0	0	0	2013/12/31	133.833	133.833	133.833	133.833	0	0	0	0	0	0	0	0
37	1998	1	5.9138	1	0	0	0	0	1	1	0	0	0	0	0	0	0	1	2013/12/31	8.0333	113.533	113.533	8.0333	1	0	0	1	1	0	0	1
38	1999	1	5.9138	0	0	0	0	0	0	0	0	0	0	0	0	0	0	0	2013/12/31	104.433	104.433	104.433	104.433	0	0	0	0	0	0	0	0
39	1999	0	5.9138	0	0	0	0	0	0	0	0	0	0	0	0	0	0	1	2013/12/31	104.467	104.467	104.467	104.467	0	0	0	0	0	0	0	0
40	1998	0	5.9138	0	0	0	0	0	0	0	0	0	0	0	0	0	0	0	2013/12/31	113.4	113.4	113.4	113.4	0	0	0	0	0	0	0	0
41	2005	1	5.911	0	0	0	0	0	0	0	0	0	0	0	0	0	0	1	2013/12/31	26.1667	26.1667	26.1667	26.1667	0	0	0	0	0	0	0	0
42	2003	0	5.911	0	0	0	0	0	0	0	0	0	0	0	0	0	0	1	2013/12/31	59.7667	59.7667	59.7667	59.7667	0	0	0	0	0	0	0	0
43	2002	1	5.911	0	0	0	0	0	0	0	0	0	0	0	0	0	0	1	2013/12/31	68.9	68.9	68.9	68.9	0	0	0	0	0	0	0	0
44	2002	0	5.911	0	0	0	0	0	0	0	0	0	0	0	0	0	0	0	2013/12/31	68.9667	68.9667	68.9667	68.9667	0	0	0	0	0	0	0	0
45	2002	1	5.911	0	0	0	0	0	0	0	0	0	0	0	0	0	0	0	2013/12/31	68.9667	68.9667	68.9667	68.9667	0	0	0	0	0	0	0	0
46	2005	0	5.9083	0	0	0	0	0	0	0	0	0	1	0	0	0	1	1	2013/12/31	35.4667	35.4667	35.4667	35.4667	0	0	0	0	0	0	0	0
47	2005	1	5.9083	0	0	0	0	0	1	0	0	1	0	0	0	0	0	0	2013/12/31	35.6333	35.6333	35.6333	35.6333	0	0	0	0	0	0	0	0
48	2000	1	5.9083	0	0	0	0	0	1	1	1	0	0	0	0	0	0	1	2013/12/31	91.1667	91.1667	91.1667	91.1667	0	0	0	0	0	0	0	0
49	2000	1	5.9083	0	0	0	0	0	0	0	0	0	0	0	0	0	0	0	2013/12/31	91.2667	91.2667	91.2667	91.2667	0	0	0	0	0	0	0	0
50	2000	1	5.9083	0	0	1	0	0	1	1	0	0	0	0	0	0	0	0	2013/12/31	91.3333	91.3333	91.3333	91.3333	0	0	0	0	0	0	0	0
51	2004	1	5.9028	0	0	0	0	0	1	1	1	0	0	0	0	0	0	1	2013/12/31	46.5	46.5	46.5	46.5	0	0	0	0	0	0	0	0
52	2003	0	5.9001	0	0	0	0	0	0	0	0	0	0	0	0	0	0	0	2013/12/31	2.0333	2.0333	59.0333	59.0333	1	1	0	0	1	1	0	0
53	2003	1	5.9001	0	0	0	0	0	0	0	0	0	1	0	0	0	1	1	2013/12/31	58.8667	58.8667	58.8667	58.8667	0	0	0	0	0	0	0	0
54	1998	1	5.8754	0	0	0	0	0	1	1	1	0	0	0	0	0	0	1	2013/12/31	122	122	122	122	0	0	0	0	0	0	0	0
55	2002	1	5.8727	0	0	0	0	0	0	0	0	0	0	0	0	0	0	1	2013/12/31	64.2	64.2	64.2	64.2	0	0	0	0	0	0	0	0
56	2002	1	5.8727	0	0	0	0	0	1	1	0	1	0	0	0	0	0	0	2013/12/31	64.3333	64.3333	64.3333	64.3333	0	0	0	0	0	0	0	0
57	1997	1	5.8727	0	0	0	0	0	1	0	0	1	0	0	0	0	0	1	2013/12/31	127.2	127.2	127.2	127.2	0	0	0	0	0	0	0	0
58	2006	0	5.8617	0	0	0	0	0	1	1	0	0	1	1	1	0	0	0	2013/12/31	19.8333	19.8333	19.8333	19.8333	0	0	0	0	0	0	0	0
59	2006	0	5.8617	0	0	0	0	0	0	0	0	0	0	0	0	0	0	1	2013/12/31	19.8333	19.8333	19.8333	19.8333	0	0	0	0	0	0	0	0
60	1999	0	5.859	0	0	0	0	0	0	0	0	0	1	1	1	0	0	0	2005/06/01	0	0	0	0	0	0	0	0	0	0	0	0
61	1999	1	5.859	0	0	0	0	0	1	1	1	0	0	0	0	0	0	1	2013/12/31	104.933	104.933	104.933	104.933	0	0	0	0	0	0	0	0
62	1999	1	5.8535	0	0	0	0	0	0	0	0	0	0	0	0	0	0	1	2013/12/31	108.2	108.2	108.2	108.2	0	0	0	0	0	0	0	0
63	2005	0	5.848	0	0	0	0	0	0	0	0	0	0	0	0	0	0	1	2013/12/31	3.9	27.0667	3.9	27.0667	1	0	1	0	1	0	1	0
64	2006	1	5.848	0	0	0	0	0	1	0	1	0	0	0	0	0	0	1	2013/12/31	15.1333	15.1333	15.1333	15.1333	0	0	0	0	0	0	0	0
65	2005	1	5.848	0	0	0	0	0	0	0	0	0	0	0	0	0	0	0	2013/12/31	27.0667	27.0667	27.0667	27.0667	0	0	0	0	0	0	0	0
66	1999	1	5.8453	0	0	0	0	0	1	1	0	0	0	0	0	0	0	1	2013/12/31	111.233	111.233	111.233	111.233	0	0	0	0	0	0	0	0
67	2004	1	5.8426	0	0	0	0	0	0	0	0	0	1	1	0	1	0	1	2013/12/31	43.2667	43.2667	43.2667	43.2667	0	0	0	0	0	0	0	0
68	1997	0	5.8398	0	0	0	0	0	0	0	0	0	0	0	0	0	0	0	2013/12/31	128.333	128.333	128.333	128.333	0	0	0	0	0	0	0	0
69	1997	0	5.8398	0	0	1	0	0	1	1	1	0	0	0	0	0	0	1	2013/12/31	128.633	128.633	128.633	128.633	0	0	0	0	0	0	0	0
70	1996	1	5.8344	0	0	0	0	0	0	0	0	0	0	0	0	0	0	1	2013/12/31	147.9	147.9	147.9	147.9	0	0	0	0	0	0	0	0
71	1996	1	5.8344	0	0	0	0	0	0	0	0	0	1	1	0	1	0	0	2013/12/31	148.033	148.033	148.033	148.033	0	0	0	0	0	0	0	0
72	2005	1	5.8316	0	0	0	0	0	1	1	0	0	1	1	1	0	0	1	2013/12/31	35.3333	35.3333	35.3333	35.3333	0	0	0	0	0	0	0	0
73	2004	1	5.8316	0	0	0	0	0	0	0	0	0	1	1	1	0	0	0	2013/12/31	43.5667	43.5667	43.5667	43.5667	0	0	0	0	0	0	0	0
74	2002	1	5.8316	0	0	0	1	0	1	0	1	0	1	0	0	0	1	1	2013/12/31	69.7333	69.7333	69.7333	69.7333	0	0	0	0	0	0	0	0
75	1999	0	5.8316	0	0	0	0	0	1	0	1	0	1	1	1	0	0	1	2013/12/31	105	105	105	105	0	0	0	0	0	0	0	0
76	2006	0	5.8261	0	0	0	0	0	0	0	0	0	0	0	0	0	0	1	2013/12/31	22.1667	22.1667	22.1667	22.1667	0	0	0	0	0	0	0	0
77	2005	1	5.8179	0	0	0	0	0	0	0	0	0	0	0	0	0	0	0	2013/12/31	29.4333	29.4333	29.4333	29.4333	0	0	0	0	0	0	0	0
78	2005	0	5.8179	0	0	0	0	0	0	0	0	0	1	1	1	0	0	1	2013/12/31	29.5333	29.5333	29.5333	29.5333	0	0	0	0	0	0	0	0
79	1998	0	5.8152	0	0	0	0	0	0	0	0	0	1	0	0	0	1	1	2013/12/31	118.567	118.567	118.567	118.567	0	0	0	0	0	0	0	0
80	1997	1	5.8152	0	0	0	0	0	0	0	0	0	0	0	0	0	0	0	2013/12/31	125.633	125.633	125.633	125.633	0	0	0	0	0	0	0	0
81	1997	0	5.8152	0	0	0	0	0	0	0	0	0	0	0	0	0	0	1	2013/12/31	125.633	125.633	125.633	125.633	0	0	0	0	0	0	0	0
82	1997	0	5.8152	0	0	0	0	0	0	0	0	0	0	0	0	0	0	0	2013/12/31	125.867	125.867	125.867	125.867	0	0	0	0	0	0	0	0
83	2004	0	5.8097	0	0	0	0	0	0	0	0	0	0	0	0	0	0	1	2013/12/31	43.6333	43.6333	43.6333	43.6333	0	0	0	0	0	0	0	0
84	2004	1	5.8097	0	0	0	0	0	0	0	0	0	0	0	0	0	0	0	2013/12/31	43.6667	43.6667	43.6667	43.6667	0	0	0	0	0	0	0	0
85	1998	1	5.7988	0	0	0	0	0	0	0	0	0	0	0	0	0	0	1	2013/12/31	124.033	124.033	124.033	124.033	0	0	0	0	0	0	0	0
86	2000	0	5.796	0	0	0	0	0	1	1	0	0	1	1	1	0	0	1	2013/12/31	88.4667	88.4667	88.4667	88.4667	0	0	0	0	0	0	0	0
87	2001	1	5.7878	0	0	1	1	0	1	1	0	1	0	0	0	0	0	1	2013/12/31	80.6333	80.6333	80.6333	80.6333	0	0	0	0	0	0	0	0
88	1998	0	5.7851	0	0	0	0	0	0	0	0	0	0	0	0	0	0	1	2013/12/31	118.2	118.2	118.2	118.2	0	0	0	0	0	0	0	0
89	2002	0	5.7741	0	0	0	0	0	1	0	0	1	0	0	0	0	0	1	2013/12/31	67.5333	67.5333	67.5333	67.5333	0	0	0	0	0	0	0	0
90	2002	1	5.7741	0	0	0	0	0	0	0	0	0	0	0	0	0	0	0	2013/12/31	67.6	67.6	67.6	67.6	0	0	0	0	0	0	0	0
91	2002	1	5.7741	0	0	0	1	0	1	1	0	0	0	0	0	0	0	0	2013/12/31	67.6333	67.6333	67.6333	67.6333	0	0	0	0	0	0	0	0
92	2002	1	5.7659	0	0	0	0	0	0	0	0	0	0	0	0	0	0	0	2013/12/31	8.5667	8.5667	66.7	66.7	1	1	0	0	1	1	0	0
93	2004	0	5.7659	0	0	0	0	0	1	0	1	0	0	0	0	0	0	1	2013/12/31	42	42	42	42	0	0	0	0	0	0	0	0
94	2002	0	5.7659	0	0	0	0	0	0	0	0	0	0	0	0	0	0	1	2013/12/31	66.6333	66.6333	66.6333	66.6333	0	0	0	0	0	0	0	0
95	2002	1	5.755	0	0	0	0	0	0	0	0	0	0	0	0	0	0	1	2008/07/08	3	3	3	3	0	0	0	0	0	0	0	0
96	2002	1	5.755	0	0	0	0	0	0	0	0	0	0	0	0	0	0	0	2013/12/31	3.6667	69.8667	3.6667	69.8667	1	0	1	0	1	0	1	0
97	2006	1	5.755	0	0	0	0	0	1	0	0	1	0	0	0	0	0	1	2013/12/31	17.7333	17.7333	17.7333	17.7333	0	0	0	0	0	0	0	0
98	1996	1	5.7522	0	0	0	0	0	0	0	0	0	0	0	0	0	0	1	2013/12/31	3	145.733	3	145.733	1	0	1	0	1	0	1	0
99	1998	1	5.7495	0	0	0	0	0	0	0	0	0	0	0	0	0	0	1	2013/12/31	119.467	119.467	119.467	119.467	0	0	0	0	0	0	0	0
100	1998	0	5.7495	0	0	0	0	0	0	0	0	0	0	0	0	0	0	0	2013/12/31	119.633	119.633	119.633	119.633	0	0	0	0	0	0	0	0
101	1998	0	5.7495	0	0	0	0	0	0	0	0	0	0	0	0	0	0	0	2013/12/31	119.667	119.667	119.667	119.667	0	0	0	0	0	0	0	0
102	1998	1	5.744	0	0	0	0	0	0	0	0	0	0	0	0	0	0	0	2013/12/31	121.7	121.7	121.7	121.7	0	0	0	0	0	0	0	0
103	1998	1	5.744	0	0	0	0	0	1	0	1	0	0	0	0	0	0	1	2013/12/31	121.7	121.7	121.7	121.7	0	0	0	0	0	0	0	0
104	2001	1	5.7413	0	0	0	0	0	0	0	0	0	0	0	0	0	0	0	2013/12/31	0.2333	88.3	88.3	0.2333	0	0	0	0	0	0	0	0
105	2001	0	5.7413	0	0	0	0	0	1	1	1	1	0	0	0	0	0	1	2013/12/31	87.9333	87.9333	87.9333	87.9333	0	0	0	0	0	0	0	0
106	2001	1	5.7413	0	0	0	0	0	0	0	0	0	1	1	1	0	0	0	2013/12/31	88.1667	88.1667	88.1667	88.1667	0	0	0	0	0	0	0	0
107	2001	1	5.7413	0	0	0	0	0	0	0	0	0	0	0	0	0	0	0	2013/12/31	88.2	88.2	88.2	88.2	0	0	0	0	0	0	0	0
108	2001	1	5.7413	0	0	0	0	0	0	0	0	0	0	0	0	0	0	0	2013/12/31	88.2333	88.2333	88.2333	88.2333	0	0	0	0	0	0	0	0
109	1996	1	5.7413	0	0	0	0	0	0	0	0	0	0	0	0	0	0	1	2013/12/31	145.967	145.967	145.967	145.967	0	0	0	0	0	0	0	0
110	1996	1	5.7413	0	0	1	0	0	1	1	0	0	0	0	0	0	0	0	2013/12/31	146.133	146.133	146.133	146.133	0	0	0	0	0	0	0	0
111	1996	0	5.7413	0	0	0	0	0	0	0	0	0	0	0	0	0	0	0	2013/12/31	146.167	146.167	146.167	146.167	0	0	0	0	0	0	0	0
112	2004	1	5.7358	0	0	0	0	0	0	0	0	0	1	1	1	0	0	1	2013/12/31	41.3667	41.3667	41.3667	41.3667	0	0	0	0	0	0	0	0
113	2004	0	5.7331	1	0	0	0	0	0	0	0	0	0	0	0	0	0	1	2013/12/31	43.6333	43.6333	43.6333	43.6333	0	0	0	0	0	0	0	0
114	1997	1	5.7331	1	0	0	0	0	0	0	0	0	1	1	1	0	0	1	2013/12/31	133.967	133.967	133.967	133.967	0	0	0	0	0	0	0	0
115	2000	1	5.7248	0	0	0	0	0	1	0	1	1	0	0	0	0	0	0	2013/12/31	95.5333	95.5333	95.5333	95.5333	0	0	0	0	0	0	0	0
116	2000	0	5.7248	0	0	0	0	0	0	0	0	0	0	0	0	0	0	1	2013/12/31	95.5667	95.5667	95.5667	95.5667	0	0	0	0	0	0	0	0
117	2000	0	5.7248	0	0	0	0	0	0	0	0	0	0	0	0	0	0	0	2013/12/31	95.6333	95.6333	95.6333	95.6333	0	0	0	0	0	0	0	0
118	2007	1	5.7221	0	0	0	0	0	0	0	0	0	0	0	0	0	0	1	2013/12/31	15.3	15.3	15.3	15.3	0	0	0	0	0	0	0	0
119	2007	1	5.7221	0	0	0	0	0	0	0	0	0	0	0	0	0	0	0	2013/12/31	15.4667	15.4667	15.4667	15.4667	0	0	0	0	0	0	0	0
120	2005	1	5.7221	0	0	0	1	0	1	1	0	0	1	0	0	0	1	1	2013/12/31	39.6333	39.6333	39.6333	39.6333	0	0	0	0	0	0	0	0
121	2005	0	5.7221	0	0	0	0	0	0	0	0	0	0	0	0	0	0	0	2013/12/31	39.7667	39.7667	39.7667	39.7667	0	0	0	0	0	0	0	0
122	2000	1	5.7221	0	0	0	0	0	0	0	0	0	0	0	0	0	0	0	2013/12/31	94.6	94.6	94.6	94.6	0	0	0	0	0	0	0	0
123	2000	1	5.7221	0	0	0	0	0	0	0	0	0	0	0	0	0	0	1	2013/12/31	94.6	94.6	94.6	94.6	0	0	0	0	0	0	0	0
124	2003	1	5.7194	0	0	0	0	0	0	0	0	0	0	0	0	0	0	1	2013/12/31	64.1667	64.1667	64.1667	64.1667	0	0	0	0	0	0	0	0
125	2002	0	5.7194	0	0	0	0	0	0	0	0	0	1	1	1	0	0	0	2013/12/31	66.1333	66.1333	66.1333	66.1333	0	0	0	0	0	0	0	0
126	2002	0	5.7194	0	0	0	0	0	1	1	1	1	1	1	0	1	1	1	2013/12/31	66.2	66.2	66.2	66.2	0	0	0	0	0	0	0	0
127	1999	0	5.7194	0	0	0	0	0	0	0	0	0	0	0	0	0	0	0	2013/12/31	102.6	102.6	102.6	102.6	0	0	0	0	0	0	0	0
128	1999	1	5.7194	0	0	0	0	0	0	0	0	0	1	1	1	0	0	1	2013/12/31	102.767	102.767	102.767	102.767	0	0	0	0	0	0	0	0
129	1996	0	5.7166	0	0	0	0	0	1	0	0	1	1	1	0	1	0	1	2013/12/31	0.1	142.133	0.1	142.133	0	0	0	0	0	0	0	0
130	1996	1	5.7166	0	0	0	0	0	0	0	0	0	0	0	0	0	0	0	2013/12/31	142.233	142.233	142.233	142.233	0	0	0	0	0	0	0	0
131	1999	0	5.7084	0	0	0	0	0	0	0	0	0	1	1	0	1	0	1	2013/12/31	4.4333	4.4333	4.4333	111.8	1	1	1	0	1	1	1	0
132	1999	1	5.7084	0	0	0	0	0	1	0	1	0	1	1	1	0	0	0	2013/12/31	111.967	111.967	111.967	111.967	0	0	0	0	0	0	0	0
133	1999	0	5.7084	0	0	0	0	0	0	0	0	0	0	0	0	0	0	1	2013/12/31	112.9	112.9	112.9	112.9	0	0	0	0	0	0	0	0
134	1999	1	5.7057	0	0	0	0	0	0	0	0	0	1	1	1	0	0	0	2013/12/31	103.8	103.8	103.8	103.8	0	0	0	0	0	0	0	0
135	1999	0	5.7057	0	0	0	0	0	0	0	0	0	0	0	0	0	0	1	2013/12/31	103.833	103.833	103.833	103.833	0	0	0	0	0	0	0	0
136	2006	1	5.7029	0	0	0	0	0	0	0	0	0	1	1	1	0	0	1	2013/12/31	24.6667	24.6667	24.6667	24.6667	0	0	0	0	0	0	0	0
137	2000	0	5.7002	0	0	0	0	0	0	0	0	0	0	0	0	0	0	1	2013/12/31	94.7667	94.7667	94.7667	94.7667	0	0	0	0	0	0	0	0
138	1996	0	5.6975	0	0	0	0	0	0	0	0	0	0	0	0	0	0	1	2013/12/31	139.4	139.4	139.4	139.4	0	0	0	0	0	0	0	0
139	1996	0	5.6975	0	0	0	0	0	0	0	0	0	0	0	0	0	0	0	2013/12/31	139.533	139.533	139.533	139.533	0	0	0	0	0	0	0	0
140	1996	0	5.6893	0	0	0	0	0	0	0	0	0	0	0	0	0	0	1	2013/12/31	148.733	148.733	148.733	148.733	0	0	0	0	0	0	0	0
141	2007	0	5.6865	0	0	0	0	0	0	0	0	0	0	0	0	0	0	1	2013/12/31	15.7333	15.7333	15.7333	15.7333	0	0	0	0	0	0	0	0
142	2007	1	5.6865	0	0	0	0	0	0	0	0	0	0	0	0	0	0	0	2013/12/31	15.9333	15.9333	15.9333	15.9333	0	0	0	0	0	0	0	0
143	2006	1	5.681	0	0	0	0	0	0	0	0	0	0	0	0	0	0	1	2013/12/31	24.9333	24.9333	24.9333	24.9333	0	0	0	0	0	0	0	0
144	2005	0	5.6783	0	0	0	0	0	0	0	0	0	0	0	0	0	0	0	2013/12/31	31.1333	31.1333	31.1333	31.1333	0	0	0	0	0	0	0	0
145	2005	0	5.6783	0	0	0	0	0	0	0	0	0	0	0	0	0	0	0	2013/12/31	31.1333	31.1333	31.1333	31.1333	0	0	0	0	0	0	0	0
146	2005	1	5.6783	0	0	0	0	0	0	0	0	0	0	0	0	0	0	1	2013/12/31	31.2667	31.2667	31.2667	31.2667	0	0	0	0	0	0	0	0
147	2005	1	5.6783	0	0	0	0	0	1	1	0	1	0	0	0	0	0	1	2013/12/31	36.2	36.2	36.2	36.2	0	0	0	0	0	0	0	0
148	2005	1	5.6783	0	0	1	0	0	1	1	1	0	0	0	0	0	0	0	2013/12/31	36.3333	36.3333	36.3333	36.3333	0	0	0	0	0	0	0	0
149	2000	1	5.6783	0	0	0	0	0	0	0	0	0	0	0	0	0	0	1	2013/12/31	94.8	94.8	94.8	94.8	0	0	0	0	0	0	0	0
150	2000	0	5.6783	0	0	0	0	0	0	0	0	0	0	0	0	0	0	0	2013/12/31	95.1333	95.1333	95.1333	95.1333	0	0	0	0	0	0	0	0
151	2000	0	5.6783	0	0	0	0	0	0	0	0	0	1	1	1	0	0	0	2013/12/31	95.1667	95.1667	95.1667	95.1667	0	0	0	0	0	0	0	0
152	1999	1	5.6701	0	0	0	0	0	0	0	0	0	0	0	0	0	0	0	2013/12/31	1.9667	104.333	104.333	1.9667	1	0	0	1	1	0	0	1
153	2006	0	5.6701	0	0	0	0	0	0	0	0	0	0	0	0	0	0	0	2013/12/31	18	18	18	18	0	0	0	0	0	0	0	0
154	2006	1	5.6701	0	0	0	0	0	0	0	0	0	0	0	0	0	0	1	2013/12/31	18.1	18.1	18.1	18.1	0	0	0	0	0	0	0	0
155	2006	0	5.6701	0	0	0	0	0	1	0	1	0	0	0	0	0	0	0	2013/12/31	18.1333	18.1333	18.1333	18.1333	0	0	0	0	0	0	0	0
156	1999	0	5.6701	0	0	0	0	0	0	0	0	0	0	0	0	0	0	0	2013/12/31	104.433	104.433	104.433	104.433	0	0	0	0	0	0	0	0
157	1997	0	5.6674	0	0	0	0	0	0	0	0	0	0	0	0	0	0	1	2013/12/31	133.733	133.733	133.733	133.733	0	0	0	0	0	0	0	0
158	1997	1	5.6674	0	0	0	0	0	0	0	0	0	0	0	0	0	0	0	2013/12/31	133.8	133.8	133.8	133.8	0	0	0	0	0	0	0	0
159	2002	1	5.6646	0	0	0	0	0	0	0	0	0	0	0	0	0	0	0	2013/12/31	76.9667	76.9667	76.9667	76.9667	0	0	0	0	0	0	0	0
160	2002	0	5.6646	0	0	0	0	0	0	0	0	0	0	0	0	0	0	1	2013/12/31	77	77	77	77	0	0	0	0	0	0	0	0
161	1999	0	5.6646	0	0	0	0	0	0	0	0	0	1	1	0	1	0	0	2013/12/31	106.433	106.433	106.433	106.433	0	0	0	0	0	0	0	0
162	1999	1	5.6646	0	0	0	0	0	0	0	0	0	1	0	0	0	1	1	2013/12/31	106.467	106.467	106.467	106.467	0	0	0	0	0	0	0	0
163	1997	0	5.6619	0	0	0	0	0	0	0	0	0	1	0	0	0	1	0	2013/12/31	134.9	134.9	134.9	134.9	0	0	0	0	0	0	0	0
164	1997	1	5.6619	0	0	0	0	0	1	0	1	0	1	1	1	0	0	1	2013/12/31	134.933	134.933	134.933	134.933	0	0	0	0	0	0	0	0
165	1996	1	5.6619	0	0	0	0	0	0	0	0	0	1	0	0	0	1	1	2013/12/31	141.767	141.767	141.767	141.767	0	0	0	0	0	0	0	0
166	2001	0	5.6564	0	0	0	0	0	1	0	1	0	1	1	1	0	0	1	2013/12/31	85.2	85.2	85.2	85.2	0	0	0	0	0	0	0	0
167	2000	0	5.6564	0	0	0	0	0	0	0	0	0	1	1	0	1	0	0	2013/12/31	92.3333	92.3333	92.3333	92.3333	0	0	0	0	0	0	0	0
168	2000	1	5.6564	0	0	1	0	0	1	1	0	0	0	0	0	0	0	1	2013/12/31	92.3333	92.3333	92.3333	92.3333	0	0	0	0	0	0	0	0
169	2000	1	5.6564	0	0	0	0	0	0	0	0	0	0	0	0	0	0	0	2013/12/31	92.3667	92.3667	92.3667	92.3667	0	0	0	0	0	0	0	0
170	2000	1	5.6564	0	0	0	0	0	0	0	0	0	0	0	0	0	0	0	2013/12/31	92.4333	92.4333	92.4333	92.4333	0	0	0	0	0	0	0	0
171	1996	1	5.6537	0	0	0	0	0	0	0	0	0	0	0	0	0	0	1	2013/12/31	143.833	143.833	143.833	143.833	0	0	0	0	0	0	0	0
172	2001	1	5.6482	0	0	0	0	0	0	0	0	0	0	0	0	0	0	0	2013/12/31	80.2333	80.2333	80.2333	80.2333	0	0	0	0	0	0	0	0
173	2001	0	5.6482	0	0	0	0	0	0	0	0	0	1	1	0	1	0	1	2013/12/31	80.2333	80.2333	80.2333	80.2333	0	0	0	0	0	0	0	0
174	2006	1	5.6372	0	0	0	0	0	0	0	0	0	0	0	0	0	0	1	2013/12/31	28.6333	28.6333	28.6333	28.6333	0	0	0	0	0	0	0	0
175	2006	0	5.6372	0	0	0	0	0	0	0	0	0	0	0	0	0	0	0	2013/12/31	28.6667	28.6667	28.6667	28.6667	0	0	0	0	0	0	0	0
176	1996	1	5.6372	0	0	0	0	0	0	0	0	0	0	0	0	0	0	0	2013/12/31	140.167	140.167	140.167	140.167	0	0	0	0	0	0	0	0
177	1996	1	5.6372	0	0	0	0	0	0	0	0	0	0	0	0	0	0	0	2013/12/31	140.2	140.2	140.2	140.2	0	0	0	0	0	0	0	0
178	1996	1	5.6372	0	0	0	0	0	0	0	0	0	0	0	0	0	0	1	2013/12/31	140.2	140.2	140.2	140.2	0	0	0	0	0	0	0	0
179	2002	1	5.6345	0	0	0	0	0	1	1	1	0	0	0	0	0	0	0	2013/12/31	7.7667	7.7667	68.2667	68.2667	1	1	0	0	1	1	0	0
180	2002	1	5.6345	0	0	0	0	0	0	0	0	0	0	0	0	0	0	0	2013/12/31	68.1333	68.1333	68.1333	68.1333	0	0	0	0	0	0	0	0
181	2002	1	5.6345	0	0	0	0	0	0	0	0	0	0	0	0	0	0	1	2013/12/31	68.3	68.3	68.3	68.3	0	0	0	0	0	0	0	0
182	2005	1	5.6318	0	0	0	0	0	0	0	0	0	0	0	0	0	0	1	2013/12/31	3.2	30.5667	30.5667	3.2	1	0	0	1	1	0	0	1
183	2005	1	5.6318	0	0	0	0	0	0	0	0	0	0	0	0	0	0	0	2013/12/31	30.6667	30.6667	30.6667	30.6667	0	0	0	0	0	0	0	0
184	2002	1	5.629	0	0	0	0	0	1	0	0	1	1	0	0	0	1	1	2013/12/31	72.3333	72.3333	72.3333	72.3333	0	0	0	0	0	0	0	0
185	2002	1	5.6263	0	0	0	0	0	1	1	0	0	0	0	0	0	0	1	2013/12/31	76.3	76.3	76.3	76.3	0	0	0	0	0	0	0	0
186	1999	1	5.6181	0	0	0	0	0	0	0	0	0	0	0	0	0	0	1	2013/12/31	103.9	103.9	103.9	103.9	0	0	0	0	0	0	0	0
187	1999	0	5.6181	0	0	0	0	0	0	0	0	0	0	0	0	0	0	0	2013/12/31	104.033	104.033	104.033	104.033	0	0	0	0	0	0	0	0
188	1998	1	5.6153	0	0	0	0	0	0	0	0	0	0	0	0	0	0	1	2013/12/31	123.167	123.167	123.167	123.167	0	0	0	0	0	0	0	0
189	1998	1	5.6153	0	0	0	0	0	1	0	1	1	0	0	0	0	0	0	2013/12/31	123.233	123.233	123.233	123.233	0	0	0	0	0	0	0	0
190	2000	1	5.6126	0	0	1	0	0	1	1	0	0	1	1	1	0	0	1	2013/12/31	94.9667	94.9667	94.9667	94.9667	0	0	0	0	0	0	0	0
191	2006	1	5.6016	0	0	0	0	0	0	0	0	0	1	1	1	0	0	1	2013/12/31	21.7	21.7	21.7	21.7	0	0	0	0	0	0	0	0
192	2005	0	5.6016	0	0	0	0	0	0	0	0	0	0	0	0	0	0	1	2013/12/31	37.2333	37.2333	37.2333	37.2333	0	0	0	0	0	0	0	0
193	2006	1	5.5962	0	0	0	0	0	1	1	0	0	0	0	0	0	0	1	2013/12/31	20.9333	20.9333	20.9333	20.9333	0	0	0	0	0	0	0	0
194	2000	0	5.5962	0	0	0	0	0	0	0	0	0	0	0	0	0	0	1	2013/12/31	90.9	90.9	90.9	90.9	0	0	0	0	0	0	0	0
195	2000	0	5.5962	0	0	0	0	0	0	0	0	0	0	0	0	0	0	0	2013/12/31	91.0333	91.0333	91.0333	91.0333	0	0	0	0	0	0	0	0
196	2000	1	5.5934	0	0	0	0	0	0	0	0	0	1	0	0	0	1	1	2013/12/31	98.0333	98.0333	98.0333	98.0333	0	0	0	0	0	0	0	0
197	2000	1	5.5934	0	0	0	0	0	0	0	0	0	1	0	0	0	1	0	2013/12/31	98.1667	98.1667	98.1667	98.1667	0	0	0	0	0	0	0	0
198	1996	1	5.5934	0	0	0	0	0	0	0	0	0	0	0	0	0	0	1	2013/12/31	149.9	149.9	149.9	149.9	0	0	0	0	0	0	0	0
199	1998	1	5.5907	0	0	0	0	0	0	0	0	0	0	0	0	0	0	1	2013/12/31	117.333	117.333	117.333	117.333	0	0	0	0	0	0	0	0
200	1998	1	5.5907	0	0	0	0	0	1	1	0	0	1	0	0	0	1	0	2013/12/31	117.5	117.5	117.5	117.5	0	0	0	0	0	0	0	0
201	1998	0	5.5907	0	0	0	0	0	0	0	0	0	1	0	0	0	1	0	2013/12/31	117.533	117.533	117.533	117.533	0	0	0	0	0	0	0	0
202	2004	0	5.5852	0	0	0	0	0	1	1	0	0	0	0	0	0	0	1	2013/12/31	49.4667	49.4667	49.4667	49.4667	0	0	0	0	0	0	0	0
203	1996	0	5.5825	0	0	0	0	0	0	0	0	0	0	0	0	0	0	0	2013/12/31	9.8667	145	145	9.8667	1	0	0	1	1	0	0	1
204	2006	1	5.5825	0	0	0	0	0	0	0	0	0	0	0	0	0	0	1	2013/12/31	23.2667	23.2667	23.2667	23.2667	0	0	0	0	0	0	0	0
205	2002	0	5.5825	0	0	0	0	0	0	0	0	0	1	1	0	1	0	1	2013/12/31	77.8333	77.8333	77.8333	77.8333	0	0	0	0	0	0	0	0
206	2002	1	5.5825	0	0	0	0	0	0	0	0	0	0	0	0	0	0	0	2013/12/31	78.0333	78.0333	78.0333	78.0333	0	0	0	0	0	0	0	0
207	1996	0	5.5825	0	0	0	0	0	0	0	0	0	1	1	1	0	0	1	2013/12/31	144.867	144.867	144.867	144.867	0	0	0	0	0	0	0	0
208	1996	0	5.5825	0	0	0	0	0	0	0	0	0	0	0	0	0	0	0	2013/12/31	144.933	144.933	144.933	144.933	0	0	0	0	0	0	0	0
209	2002	0	5.5797	1	1	0	0	0	1	0	0	1	0	0	0	0	0	0	2013/12/31	1.3667	7.5	68.9333	1.3667	1	1	0	1	1	1	0	1
210	2006	0	5.5797	0	0	0	0	0	1	0	0	1	0	0	0	0	0	1	2013/12/31	17.8667	17.8667	17.8667	17.8667	0	0	0	0	0	0	0	0
211	2006	1	5.5797	0	0	0	0	0	0	0	0	0	0	0	0	0	0	1	2013/12/31	19.2333	19.2333	19.2333	19.2333	0	0	0	0	0	0	0	0
212	2006	0	5.5797	0	0	0	0	0	1	1	1	0	0	0	0	0	0	0	2013/12/31	19.2667	19.2667	19.2667	19.2667	0	0	0	0	0	0	0	0
213	2002	1	5.5797	0	0	0	0	0	0	0	0	0	1	0	0	0	1	1	2013/12/31	68.7	68.7	68.7	68.7	0	0	0	0	0	0	0	0
214	2000	0	5.5797	0	0	0	0	0	0	0	0	0	0	0	0	0	0	0	2013/12/31	92.0667	92.0667	92.0667	92.0667	0	0	0	0	0	0	0	0
215	1996	1	5.577	0	0	0	0	0	0	0	0	0	0	0	0	0	0	1	2013/12/31	144.067	144.067	144.067	144.067	0	0	0	0	0	0	0	0
216	2005	0	5.5715	0	0	0	0	0	0	0	0	0	1	1	1	0	0	1	2013/12/31	37.3333	37.3333	37.3333	37.3333	0	0	0	0	0	0	0	0
217	1999	1	5.5715	1	0	0	0	0	0	0	0	0	0	0	0	0	0	1	2013/12/31	108.3	108.3	108.3	108.3	0	0	0	0	0	0	0	0
218	2006	1	5.5688	0	0	0	0	0	0	0	0	0	1	1	1	1	0	1	2013/12/31	20.1667	20.1667	20.1667	20.1667	0	0	0	0	0	0	0	0
219	2006	0	5.5688	0	0	0	0	0	0	0	0	0	0	0	0	0	0	0	2013/12/31	20.4333	20.4333	20.4333	20.4333	0	0	0	0	0	0	0	0
220	2001	0	5.5688	0	0	0	0	0	0	0	0	0	0	0	0	0	0	1	2013/12/31	84.2333	84.2333	84.2333	84.2333	0	0	0	0	0	0	0	0
221	1996	1	5.5688	1	0	0	0	0	0	0	0	0	0	0	0	0	0	1	2013/12/31	150.767	150.767	150.767	150.767	0	0	0	0	0	0	0	0
222	1996	1	5.5688	0	0	0	0	0	0	0	0	0	1	1	0	1	0	0	2013/12/31	151.233	151.233	151.233	151.233	0	0	0	0	0	0	0	0
223	2000	1	5.5606	0	0	0	0	0	0	0	0	0	0	0	0	0	0	1	2013/12/31	91.3333	91.3333	91.3333	91.3333	0	0	0	0	0	0	0	0
224	2004	1	5.5578	0	0	0	0	0	1	0	0	1	0	0	0	0	0	1	2013/12/31	51.9	51.9	51.9	51.9	0	0	0	0	0	0	0	0
225	2004	1	5.5578	0	0	0	0	0	0	0	0	0	0	0	0	0	0	0	2013/12/31	51.9333	51.9333	51.9333	51.9333	0	0	0	0	0	0	0	0
226	1996	1	5.5578	0	0	0	0	0	0	0	0	0	1	1	1	1	0	0	2013/12/31	141.067	141.067	141.067	141.067	0	0	0	0	0	0	0	0
227	1996	1	5.5578	0	0	0	0	0	1	0	0	1	0	0	0	0	0	0	2013/12/31	141.2	141.2	141.2	141.2	0	0	0	0	0	0	0	0
228	1996	1	5.5578	0	0	0	0	0	0	0	0	0	0	0	0	0	0	0	2013/12/31	141.2	141.2	141.2	141.2	0	0	0	0	0	0	0	0
229	1996	1	5.5578	0	0	0	0	0	0	0	0	0	0	0	0	0	0	1	2013/12/31	141.2	141.2	141.2	141.2	0	0	0	0	0	0	0	0
230	1996	1	5.5578	0	0	0	0	0	0	0	0	0	0	0	0	0	0	0	2013/12/31	141.233	141.233	141.233	141.233	0	0	0	0	0	0	0	0
231	2006	1	5.5551	0	0	0	0	0	0	0	0	0	0	0	0	0	0	1	2013/12/31	19.2667	19.2667	19.2667	19.2667	0	0	0	0	0	0	0	0
232	1996	1	5.5551	0	0	0	0	0	0	0	0	0	1	1	1	0	0	1	2013/12/31	148.367	148.367	148.367	148.367	0	0	0	0	0	0	0	0
233	2003	1	5.5496	0	0	0	0	0	0	0	0	0	0	0	0	0	0	0	2013/12/31	65	65	65	65	0	0	0	0	0	0	0	0
234	2003	0	5.5496	0	0	0	0	0	0	0	0	0	0	0	0	0	0	1	2013/12/31	65.0667	65.0667	65.0667	65.0667	0	0	0	0	0	0	0	0
235	2001	1	5.5496	0	0	0	1	0	1	1	0	1	1	0	0	0	1	1	2013/12/31	83.4333	83.4333	83.4333	83.4333	0	0	0	0	0	0	0	0
236	2001	0	5.5496	0	1	0	0	0	1	1	1	1	1	1	1	0	0	0	2013/12/31	83.5	83.5	83.5	83.5	0	0	0	0	0	0	0	0
237	2003	1	5.5469	0	0	1	0	0	1	1	0	0	1	1	1	0	0	0	2013/12/31	61.1667	61.1667	61.1667	61.1667	0	0	0	0	0	0	0	0
238	2003	1	5.5469	0	0	0	0	0	0	0	0	0	0	0	0	0	0	1	2013/12/31	61.2333	61.2333	61.2333	61.2333	0	0	0	0	0	0	0	0
239	2005	1	5.5414	0	0	0	1	0	1	1	0	1	1	1	1	1	0	1	2013/12/31	0.4667	34.7	0.4667	34.7	0	0	0	0	0	0	0	0
240	2006	0	5.5332	0	0	0	0	0	1	1	1	0	0	0	0	0	0	1	2013/12/31	22.7667	22.7667	22.7667	22.7667	0	0	0	0	0	0	0	0
241	1998	0	5.5305	0	0	0	0	0	0	0	0	0	0	0	0	0	0	1	2013/12/31	125.333	125.333	125.333	125.333	0	0	0	0	0	0	0	0
242	1997	1	5.5305	0	0	0	0	0	1	0	1	1	1	1	1	0	0	1	2013/12/31	137.3	137.3	137.3	137.3	0	0	0	0	0	0	0	0
243	1997	1	5.5305	0	0	0	0	0	0	0	0	0	0	0	0	0	0	0	2013/12/31	137.567	137.567	137.567	137.567	0	0	0	0	0	0	0	0
244	1997	1	5.5305	0	0	0	0	0	1	0	1	0	0	0	0	0	0	0	2013/12/31	137.6	137.6	137.6	137.6	0	0	0	0	0	0	0	0
245	2004	1	5.5222	0	0	0	0	0	1	1	0	0	0	0	0	0	0	1	2013/12/31	47	47	47	47	0	0	0	0	0	0	0	0
246	2004	1	5.5222	0	0	0	0	0	0	0	0	0	0	0	0	0	0	0	2013/12/31	47.3667	47.3667	47.3667	47.3667	0	0	0	0	0	0	0	0
247	2003	1	5.5195	0	0	0	0	0	1	0	0	1	1	1	1	0	0	1	2013/12/31	56.0667	56.0667	56.0667	56.0667	0	0	0	0	0	0	0	0
248	2003	0	5.5195	0	0	0	0	0	0	0	0	0	1	0	0	0	1	0	2013/12/31	56.4667	56.4667	56.4667	56.4667	0	0	0	0	0	0	0	0
249	2003	0	5.5195	0	0	0	0	0	1	0	0	1	0	0	0	0	0	0	2013/12/31	56.5333	56.5333	56.5333	56.5333	0	0	0	0	0	0	0	0
250	1999	1	5.514	0	0	0	0	0	1	0	0	1	0	0	0	0	0	0	2013/12/31	106.267	106.267	106.267	106.267	0	0	0	0	0	0	0	0
251	1999	0	5.514	0	0	1	0	0	1	1	0	0	1	0	0	0	1	1	2013/12/31	106.267	106.267	106.267	106.267	0	0	0	0	0	0	0	0
252	1998	0	5.514	0	0	0	0	0	1	0	0	1	1	0	0	0	1	1	2013/12/31	117.133	117.133	117.133	117.133	0	0	0	0	0	0	0	0
253	2002	0	5.5113	0	0	0	0	0	1	0	0	1	0	0	0	0	0	1	2013/12/31	5.2667	5.2667	72.8	72.8	1	1	0	0	1	1	0	0
254	2002	0	5.5113	0	0	0	0	0	0	0	0	0	0	0	0	0	0	0	2013/12/31	72.7	72.7	72.7	72.7	0	0	0	0	0	0	0	0
255	2002	1	5.5113	0	0	0	0	0	0	0	0	0	0	0	0	0	0	0	2013/12/31	72.8333	72.8333	72.8333	72.8333	0	0	0	0	0	0	0	0
256	1996	1	5.5113	0	0	0	0	0	1	1	0	1	0	0	0	0	0	1	2013/12/31	140.567	140.567	140.567	140.567	0	0	0	0	0	0	0	0
257	1999	1	5.5086	0	0	0	0	0	0	0	0	0	1	1	1	0	0	1	2013/12/31	9.2	9.2	107.2	107.2	1	1	0	0	1	1	0	0
258	1996	1	5.5086	0	0	0	0	0	0	0	0	0	0	0	0	0	0	0	2013/12/31	10.6333	10.6333	140.733	140.733	1	1	0	0	1	1	0	0
259	1999	0	5.5086	0	0	1	0	0	1	1	0	0	1	1	1	0	0	0	2013/12/31	107.233	107.233	107.233	107.233	0	0	0	0	0	0	0	0
260	1999	1	5.5086	0	0	0	0	0	0	0	0	0	0	0	0	0	0	0	2013/12/31	107.333	107.333	107.333	107.333	0	0	0	0	0	0	0	0
261	1996	1	5.5086	0	0	0	0	0	1	1	0	1	0	0	0	0	0	0	2013/08/17	136.2	136.2	136.2	136.2	0	0	0	0	0	0	0	0
262	1996	1	5.5086	0	0	0	0	0	0	0	0	0	0	0	0	0	0	1	2013/12/31	140.767	140.767	140.767	140.767	0	0	0	0	0	0	0	0
263	2002	1	5.5058	0	0	0	0	0	0	0	0	0	0	0	0	0	0	1	2013/01/20	62.3333	62.3333	62.3333	62.3333	0	0	0	0	0	0	0	0
264	2002	1	5.5058	0	0	0	0	0	0	0	0	0	0	0	0	0	0	0	2013/12/31	74	74	74	74	0	0	0	0	0	0	0	0
265	1998	1	5.5003	0	0	0	0	0	0	0	0	0	0	0	0	0	0	1	2013/12/31	118.4	118.4	118.4	118.4	0	0	0	0	0	0	0	0
266	1996	0	5.4949	0	0	0	0	0	0	0	0	0	0	0	0	0	0	1	2013/12/31	144.9	144.9	144.9	144.9	0	0	0	0	0	0	0	0
267	2002	1	5.4921	0	0	0	0	0	1	1	0	0	0	0	0	0	0	1	2013/12/31	73	73	73	73	0	0	0	0	0	0	0	0
268	2002	1	5.4921	0	0	0	0	0	0	0	0	0	0	0	0	0	0	0	2013/12/31	73.1333	73.1333	73.1333	73.1333	0	0	0	0	0	0	0	0
269	2000	1	5.4921	0	0	0	0	0	0	0	0	0	0	0	0	0	0	1	2013/12/31	103.3	103.3	103.3	103.3	0	0	0	0	0	0	0	0
270	1999	1	5.4921	0	1	0	0	0	1	0	1	1	0	0	0	0	0	1	2013/12/31	105.267	105.267	105.267	105.267	0	0	0	0	0	0	0	0
271	1996	1	5.4867	0	0	0	0	0	0	0	0	0	0	0	0	0	0	1	2013/12/31	140.967	140.967	140.967	140.967	0	0	0	0	0	0	0	0
272	2003	0	5.4839	0	0	0	0	0	0	0	0	0	0	0	0	0	0	0	2013/12/31	57.8	57.8	57.8	57.8	0	0	0	0	0	0	0	0
273	2003	0	5.4839	0	0	0	0	0	0	0	0	0	0	0	0	0	0	1	2013/12/31	58	58	58	58	0	0	0	0	0	0	0	0
274	2003	1	5.4839	0	0	0	0	0	1	1	0	1	0	0	0	0	0	0	2013/12/31	58.0333	58.0333	58.0333	58.0333	0	0	0	0	0	0	0	0
275	1998	0	5.4839	0	0	0	0	0	0	0	0	0	0	0	0	0	0	1	2013/12/31	122.733	122.733	122.733	122.733	0	0	0	0	0	0	0	0
276	2006	0	5.4812	0	0	0	0	0	0	0	0	0	0	0	0	0	0	0	2013/12/31	20.2667	20.2667	20.2667	20.2667	0	0	0	0	0	0	0	0
277	2006	1	5.4812	0	0	0	0	0	1	1	0	0	0	0	0	0	0	1	2013/12/31	22.0333	22.0333	22.0333	22.0333	0	0	0	0	0	0	0	0
278	2004	1	5.4757	0	0	0	0	0	0	0	0	0	1	0	0	0	1	1	2013/12/31	54.9667	54.9667	54.9667	54.9667	0	0	0	0	0	0	0	0
279	2004	1	5.473	0	0	0	0	0	0	0	0	0	0	0	0	0	0	1	2013/12/31	9.6333	9.6333	9.6333	43.7667	1	1	1	0	1	1	1	0
280	1999	0	5.4648	0	0	0	0	0	0	0	0	0	1	0	0	0	1	0	2013/12/31	107.8	107.8	107.8	107.8	0	0	0	0	0	0	0	0
281	1999	0	5.4648	0	0	0	0	0	1	1	0	0	1	1	1	0	0	1	2013/12/31	107.833	107.833	107.833	107.833	0	0	0	0	0	0	0	0
282	1999	0	5.462	0	0	0	0	0	0	0	0	0	1	1	0	1	0	1	2013/12/31	105.567	105.567	105.567	105.567	0	0	0	0	0	0	0	0
283	1999	0	5.462	0	0	1	0	0	1	1	0	0	1	1	1	0	0	0	2013/12/31	105.833	105.833	105.833	105.833	0	0	0	0	0	0	0	0
284	2006	1	5.4538	0	0	0	0	0	0	0	0	0	1	1	1	0	0	1	2013/12/31	22.6	22.6	22.6	22.6	0	0	0	0	0	0	0	0
285	2006	0	5.4538	0	0	0	0	0	0	0	0	0	0	0	0	0	0	0	2013/12/31	22.7667	22.7667	22.7667	22.7667	0	0	0	0	0	0	0	0
286	1997	0	5.4483	0	0	0	0	0	0	0	0	0	0	0	0	0	0	1	2013/12/31	132.1	132.1	132.1	132.1	0	0	0	0	0	0	0	0
287	1997	1	5.4483	0	0	0	0	0	0	0	0	0	0	0	0	0	0	0	2013/12/31	132.433	132.433	132.433	132.433	0	0	0	0	0	0	0	0
288	1996	0	5.4456	0	0	0	0	0	0	0	0	0	0	0	0	0	0	0	2013/12/31	5.4667	5.4667	141.5	141.5	1	1	0	0	1	1	0	0
289	2004	1	5.4456	0	0	0	0	0	1	1	0	0	1	1	1	0	0	1	2013/12/31	50.2667	50.2667	50.2667	50.2667	0	0	0	0	0	0	0	0
290	2000	0	5.4456	0	0	0	0	0	0	0	0	0	0	0	0	0	0	1	2013/12/31	103	103	103	103	0	0	0	0	0	0	0	0
291	1996	1	5.4456	0	0	0	0	0	0	0	0	0	0	0	0	0	0	1	2013/12/31	141.6	141.6	141.6	141.6	0	0	0	0	0	0	0	0
292	2001	0	5.4428	0	0	0	0	0	0	0	0	0	0	0	0	0	0	0	2013/12/31	0.3	0.3	82.8	82.8	0	0	0	0	0	0	0	0
293	2001	0	5.4428	0	0	0	0	0	0	0	0	0	0	0	0	0	0	1	2013/12/31	82.5	82.5	82.5	82.5	0	0	0	0	0	0	0	0
294	2007	1	5.4374	0	0	0	0	0	1	0	0	1	0	0	0	0	0	1	2013/12/31	13.8	13.8	13.8	13.8	0	0	0	0	0	0	0	0
295	2001	0	5.4374	0	0	0	0	0	0	0	0	0	0	0	0	0	0	1	2013/12/31	83.7	83.7	83.7	83.7	0	0	0	0	0	0	0	0
296	2001	1	5.4374	0	0	0	0	0	0	0	0	0	0	0	0	0	0	0	2013/12/31	83.8333	83.8333	83.8333	83.8333	0	0	0	0	0	0	0	0
297	2001	0	5.4374	0	0	0	0	0	0	0	0	0	0	0	0	0	0	0	2013/12/31	83.8667	83.8667	83.8667	83.8667	0	0	0	0	0	0	0	0
298	2001	1	5.4374	0	0	0	0	0	0	0	0	0	0	0	0	0	0	0	2013/12/31	83.9	83.9	83.9	83.9	0	0	0	0	0	0	0	0
299	1996	0	5.4292	0	0	0	0	0	0	0	0	0	0	0	0	0	0	0	2013/12/31	6.9333	6.9333	152.867	152.867	1	1	0	0	1	1	0	0
300	1996	1	5.4292	0	0	0	0	0	0	0	0	0	0	0	0	0	0	1	2013/12/31	152.767	152.767	152.767	152.767	0	0	0	0	0	0	0	0
301	2004	1	5.4264	0	0	0	0	0	0	0	0	0	0	0	0	0	0	1	2013/12/31	44.3	44.3	44.3	44.3	0	0	0	0	0	0	0	0
302	2006	1	5.4237	0	0	0	0	0	0	0	0	0	1	1	1	1	0	1	2013/12/31	22.9667	22.9667	22.9667	22.9667	0	0	0	0	0	0	0	0
303	2006	0	5.4237	0	0	0	0	0	0	0	0	0	0	0	0	0	0	0	2013/12/31	23.1667	23.1667	23.1667	23.1667	0	0	0	0	0	0	0	0
304	2006	1	5.4237	0	0	0	0	0	0	0	0	0	0	0	0	0	0	0	2013/12/31	23.1667	23.1667	23.1667	23.1667	0	0	0	0	0	0	0	0
305	2003	1	5.4237	0	0	0	0	0	0	0	0	0	0	0	0	0	0	1	2013/12/31	42.2333	42.2333	42.2333	42.2333	0	0	0	0	0	0	0	0
306	2003	1	5.4237	0	0	0	0	0	0	0	0	0	0	0	0	0	0	1	2013/12/31	67.7	67.7	67.7	67.7	0	0	0	0	0	0	0	0
307	2003	0	5.4237	0	0	0	0	0	0	0	0	0	0	0	0	0	0	0	2013/12/31	67.8	67.8	67.8	67.8	0	0	0	0	0	0	0	0
308	1999	0	5.4237	0	0	0	0	0	0	0	0	0	0	0	0	0	0	1	2013/12/31	109.133	109.133	109.133	109.133	0	0	0	0	0	0	0	0
309	1999	1	5.4237	0	0	0	0	0	0	0	0	0	0	0	0	0	0	0	2013/12/31	109.467	109.467	109.467	109.467	0	0	0	0	0	0	0	0
310	1996	1	5.4237	0	0	0	0	0	0	0	0	0	0	0	0	0	0	0	2013/12/31	142.533	142.533	142.533	142.533	0	0	0	0	0	0	0	0
311	1996	1	5.4237	0	0	0	0	0	0	0	0	0	0	0	0	0	0	1	2013/12/31	142.733	142.733	142.733	142.733	0	0	0	0	0	0	0	0
312	1996	0	5.4237	0	0	0	0	0	0	0	0	0	1	0	0	0	1	0	2013/12/31	142.833	142.833	142.833	142.833	0	0	0	0	0	0	0	0
313	1996	1	5.4237	0	0	0	0	0	0	0	0	0	0	0	0	0	0	0	2013/12/31	142.833	142.833	142.833	142.833	0	0	0	0	0	0	0	0
314	1996	1	5.4237	0	0	0	0	0	0	0	0	0	1	1	0	1	1	0	2013/12/31	142.9	142.9	142.9	142.9	0	0	0	0	0	0	0	0
315	2003	0	5.41	0	0	0	0	0	0	0	0	0	0	0	0	0	0	1	2013/12/31	64.9333	64.9333	64.9333	64.9333	0	0	0	0	0	0	0	0
316	1997	0	5.41	0	0	0	0	0	0	0	0	0	0	0	0	0	0	0	2013/12/31	132.8	132.8	132.8	132.8	0	0	0	0	0	0	0	0
317	1997	0	5.41	0	0	0	0	0	1	1	0	0	1	1	0	1	0	1	2013/12/31	132.933	132.933	132.933	132.933	0	0	0	0	0	0	0	0
318	1997	1	5.41	0	0	0	0	0	0	0	0	0	0	0	0	0	0	0	2013/12/31	132.933	132.933	132.933	132.933	0	0	0	0	0	0	0	0
319	1997	1	5.399	0	0	0	0	0	0	0	0	0	1	1	1	0	0	1	2013/12/31	132.933	132.933	132.933	132.933	0	0	0	0	0	0	0	0
320	1997	0	5.399	1	0	0	0	0	1	1	1	1	0	0	0	0	0	0	2013/12/31	132.967	132.967	132.967	132.967	0	0	0	0	0	0	0	0
321	1997	0	5.399	0	0	0	0	0	0	0	0	0	0	0	0	0	0	0	2013/12/31	133	133	133	133	0	0	0	0	0	0	0	0
322	2003	1	5.3936	0	0	0	0	0	0	0	0	0	0	0	0	0	0	0	2013/12/31	59.4667	59.4667	59.4667	59.4667	0	0	0	0	0	0	0	0
323	2003	1	5.3936	0	0	0	0	0	0	0	0	0	1	1	0	1	1	1	2013/12/31	59.8667	59.8667	59.8667	59.8667	0	0	0	0	0	0	0	0
324	2002	1	5.3908	0	0	0	1	0	1	1	0	0	0	0	0	0	0	0	2013/12/31	72.1333	72.1333	72.1333	72.1333	0	0	0	0	0	0	0	0
325	2002	0	5.3908	0	0	1	0	0	1	0	0	1	0	0	0	0	0	0	2013/12/31	72.2	72.2	72.2	72.2	0	0	0	0	0	0	0	0
326	2002	0	5.3908	0	0	0	0	0	0	0	0	0	1	1	1	0	0	1	2013/12/31	72.2333	72.2333	72.2333	72.2333	0	0	0	0	0	0	0	0
327	2007	0	5.3881	0	0	0	0	0	0	0	0	0	0	0	0	0	0	0	2013/12/31	17.3667	17.3667	17.3667	17.3667	0	0	0	0	0	0	0	0
328	2007	1	5.3881	0	0	0	0	0	0	0	0	0	0	0	0	0	0	1	2013/12/31	17.6	17.6	17.6	17.6	0	0	0	0	0	0	0	0
329	1997	1	5.3854	0	0	0	0	0	1	1	0	1	0	0	0	0	0	0	2013/12/31	130.133	130.133	130.133	130.133	0	0	0	0	0	0	0	0
330	1997	1	5.3854	0	0	0	0	0	0	0	0	0	0	0	0	0	0	0	2013/12/31	130.167	130.167	130.167	130.167	0	0	0	0	0	0	0	0
331	1997	1	5.3854	0	0	0	0	0	1	0	0	1	0	0	0	0	0	1	2013/12/31	130.167	130.167	130.167	130.167	0	0	0	0	0	0	0	0
332	1997	1	5.3854	0	0	0	0	0	1	1	0	0	0	0	0	0	0	0	2013/12/31	130.2	130.2	130.2	130.2	0	0	0	0	0	0	0	0
333	1996	0	5.3826	0	0	0	0	0	0	0	0	0	0	0	0	0	0	1	2013/12/31	10.6333	10.6333	149	149	1	1	0	0	1	1	0	0
334	1996	1	5.3826	0	0	0	0	0	0	0	0	0	0	0	0	0	0	0	2013/12/31	149.533	149.533	149.533	149.533	0	0	0	0	0	0	0	0
335	2006	0	5.3744	0	0	0	0	0	0	0	0	0	0	0	0	0	0	0	2013/12/31	4.9667	4.9667	29.8333	29.8333	1	1	0	0	1	1	0	0
336	2006	0	5.3744	0	0	0	0	0	0	0	0	0	0	0	0	0	0	1	2013/12/31	29.7667	29.7667	29.7667	29.7667	0	0	0	0	0	0	0	0
337	2001	1	5.3744	0	0	0	0	0	0	0	0	0	0	0	0	0	0	1	2013/12/31	82.4667	82.4667	82.4667	82.4667	0	0	0	0	0	0	0	0
338	2001	1	5.3744	0	0	0	0	0	0	0	0	0	0	0	0	0	0	0	2013/12/31	82.5667	82.5667	82.5667	82.5667	0	0	0	0	0	0	0	0
339	2000	1	5.3744	0	0	1	0	0	1	0	0	1	0	0	0	0	0	0	2013/12/31	104.867	104.867	104.867	104.867	0	0	0	0	0	0	0	0
340	2000	0	5.3744	0	0	0	0	0	0	0	0	0	1	1	1	0	0	0	2013/12/31	104.933	104.933	104.933	104.933	0	0	0	0	0	0	0	0
341	1999	1	5.3662	0	0	0	0	0	0	0	0	0	0	0	0	0	0	1	2013/12/31	117.133	117.133	117.133	117.133	0	0	0	0	0	0	0	0
342	1999	1	5.3662	0	0	0	0	0	0	0	0	0	0	0	0	0	0	0	2013/12/31	117.233	117.233	117.233	117.233	0	0	0	0	0	0	0	0
343	1996	1	5.3662	0	0	0	0	0	0	0	0	0	0	0	0	0	0	1	2013/12/31	151.667	151.667	151.667	151.667	0	0	0	0	0	0	0	0
344	1996	0	5.3662	0	0	0	0	0	0	0	0	0	0	0	0	0	0	1	2013/12/31	151.667	151.667	151.667	151.667	0	0	0	0	0	0	0	0
345	2003	0	5.3634	0	0	0	0	0	0	0	0	0	0	0	0	0	0	0	2013/12/31	0.1	0.1	67.5333	67.5333	0	0	0	0	0	0	0	0
346	2003	0	5.3634	0	0	0	0	0	0	0	0	0	0	0	0	0	0	1	2013/12/31	67.3	67.3	67.3	67.3	0	0	0	0	0	0	0	0
347	2000	1	5.3634	0	0	0	0	0	0	0	0	0	0	0	0	0	0	1	2013/12/31	104	104	104	104	0	0	0	0	0	0	0	0
348	1999	0	5.3634	0	0	0	0	0	0	0	0	0	0	0	0	0	0	1	2013/12/31	108.033	108.033	108.033	108.033	0	0	0	0	0	0	0	0
349	1997	1	5.3634	0	0	0	0	0	0	0	0	0	0	0	0	0	0	1	2013/12/31	141.5	141.5	141.5	141.5	0	0	0	0	0	0	0	0
350	2006	0	5.3607	0	0	0	0	0	1	1	0	0	0	0	0	0	0	0	2013/12/31	0.5667	20.8667	20.8667	0.5667	0	0	0	0	1	0	0	1
351	2006	0	5.3607	0	0	1	0	0	0	0	0	0	1	1	1	1	0	0	2013/12/31	20.8	20.8	20.8	20.8	0	0	0	0	0	0	0	0
352	2006	1	5.3607	0	0	0	0	0	1	0	0	1	0	0	0	0	0	1	2013/12/31	20.8	20.8	20.8	20.8	0	0	0	0	0	0	0	0
353	2006	1	5.358	0	0	0	0	0	0	0	0	0	1	1	1	0	0	1	2013/12/31	22.9	22.9	22.9	22.9	0	0	0	0	0	0	0	0
354	2001	1	5.358	0	0	0	0	0	0	0	0	0	0	0	0	0	0	0	2013/12/31	82.7333	82.7333	82.7333	82.7333	0	0	0	0	0	0	0	0
355	1999	0	5.358	0	0	0	0	0	0	0	0	0	1	1	1	0	0	1	2013/12/31	112.167	112.167	112.167	112.167	0	0	0	0	0	0	0	0
356	2006	1	5.3552	0	0	0	0	0	0	0	0	0	0	0	0	0	0	1	2013/12/31	21.9333	21.9333	21.9333	21.9333	0	0	0	0	0	0	0	0
357	1997	0	5.3552	0	0	0	0	0	0	0	0	0	0	0	0	0	0	0	2013/12/31	135.533	135.533	135.533	135.533	0	0	0	0	0	0	0	0
358	1997	1	5.3552	0	0	0	0	0	0	0	0	0	0	0	0	0	0	1	2013/12/31	135.633	135.633	135.633	135.633	0	0	0	0	0	0	0	0
359	2003	0	5.3525	0	0	0	0	0	0	0	0	0	0	0	0	0	0	1	2013/12/31	61.4667	61.4667	61.4667	61.4667	0	0	0	0	0	0	0	0
360	2001	1	5.3525	0	0	0	0	0	0	0	0	0	0	0	0	0	0	0	2013/12/31	82.8333	82.8333	82.8333	82.8333	0	0	0	0	0	0	0	0
361	2001	1	5.3525	0	0	0	0	0	0	0	0	0	0	0	0	0	0	1	2013/12/31	82.8333	82.8333	82.8333	82.8333	0	0	0	0	0	0	0	0
362	2001	0	5.3498	0	0	0	0	0	0	0	0	0	0	0	0	0	0	1	2013/12/31	87.9333	87.9333	87.9333	87.9333	0	0	0	0	0	0	0	0
363	1999	0	5.347	0	0	0	0	0	0	0	0	0	0	0	0	0	0	1	2013/12/31	110.333	110.333	110.333	110.333	0	0	0	0	0	0	0	0
364	1996	0	5.347	0	0	0	0	0	0	0	0	0	1	1	0	1	0	1	2013/12/31	150.933	150.933	150.933	150.933	0	0	0	0	0	0	0	0
365	1997	1	5.3443	0	0	1	1	0	1	1	1	1	1	1	0	1	0	1	2013/12/31	7.9333	134.333	134.333	7.9333	1	0	0	1	1	0	0	1
366	1997	1	5.3443	0	0	0	0	0	1	0	1	0	0	0	0	0	0	1	2013/12/31	12.1	12.1	132.633	132.633	0	0	0	0	0	0	0	0
367	2007	1	5.3443	0	0	0	0	0	0	0	0	0	0	0	0	0	0	1	2013/12/31	19.7667	19.7667	19.7667	19.7667	0	0	0	0	0	0	0	0
368	2007	1	5.3443	0	0	0	0	0	1	0	1	0	1	1	1	0	0	0	2013/12/31	20	20	20	20	0	0	0	0	0	0	0	0
369	1997	0	5.3443	0	0	0	0	0	1	1	0	0	1	1	1	1	1	0	2013/12/31	132.6	132.6	132.6	132.6	0	0	0	0	0	0	0	0
370	1997	0	5.3443	0	0	0	0	0	1	1	0	0	0	0	0	0	0	0	2013/12/31	134.7	134.7	134.7	134.7	0	0	0	0	0	0	0	0
371	2002	1	5.3415	0	0	0	0	0	0	0	0	0	1	1	0	1	1	1	2013/12/31	69.6667	69.6667	69.6667	69.6667	0	0	0	0	0	0	0	0
372	2000	1	5.3388	0	0	0	0	0	0	0	0	0	0	0	0	0	0	0	2013/12/31	98.2333	98.2333	98.2333	98.2333	0	0	0	0	0	0	0	0
373	2000	1	5.3388	0	0	0	0	0	0	0	0	0	0	0	0	0	0	1	2013/12/31	98.3	98.3	98.3	98.3	0	0	0	0	0	0	0	0
374	2000	1	5.3251	0	0	0	0	0	0	0	0	0	0	0	0	0	0	1	2013/12/31	104.4	104.4	104.4	104.4	0	0	0	0	0	0	0	0
375	2000	0	5.3251	0	0	0	0	0	0	0	0	0	0	0	0	0	0	0	2013/12/31	104.5	104.5	104.5	104.5	0	0	0	0	0	0	0	0
376	2004	1	5.3142	0	0	0	0	0	0	0	0	0	0	0	0	0	0	1	2013/12/31	48.8333	48.8333	48.8333	48.8333	0	0	0	0	0	0	0	0
377	2003	1	5.3142	0	0	0	0	0	0	0	0	0	1	1	1	0	0	0	2013/12/31	57.9667	57.9667	57.9667	57.9667	0	0	0	0	0	0	0	0
378	2003	1	5.3142	0	0	0	0	0	0	0	0	0	0	0	0	0	0	1	2013/12/31	57.9667	57.9667	57.9667	57.9667	0	0	0	0	0	0	0	0
379	2000	1	5.3142	0	0	0	0	0	1	1	0	1	0	0	0	0	0	1	2013/12/31	98.5	98.5	98.5	98.5	0	0	0	0	0	0	0	0
380	2006	1	5.3114	0	0	0	0	0	1	1	0	0	1	1	0	1	0	0	2013/12/31	32.5333	32.5333	32.5333	32.5333	0	0	0	0	0	0	0	0
381	2006	1	5.3114	0	0	0	0	0	0	0	0	0	0	0	0	0	0	1	2013/12/31	32.5667	32.5667	32.5667	32.5667	0	0	0	0	0	0	0	0
382	2006	1	5.3114	0	0	0	0	0	0	0	0	0	1	1	1	0	0	0	2013/12/31	32.6	32.6	32.6	32.6	0	0	0	0	0	0	0	0
383	2006	1	5.3114	1	0	0	0	0	1	1	0	1	0	0	0	0	0	0	2013/12/31	32.6	32.6	32.6	32.6	0	0	0	0	0	0	0	0
384	2002	0	5.3032	0	0	0	0	0	0	0	0	0	0	0	0	0	0	0	2013/09/10	76.5333	76.5333	76.5333	76.5333	0	0	0	0	0	0	0	0
385	2002	1	5.3032	0	0	0	0	0	0	0	0	0	0	0	0	0	0	1	2013/12/31	80.3333	80.3333	80.3333	80.3333	0	0	0	0	0	0	0	0
386	2001	1	5.3032	0	0	0	0	0	0	0	0	0	1	1	1	0	0	1	2013/12/31	82.3667	82.3667	82.3667	82.3667	0	0	0	0	0	0	0	0
387	2001	1	5.3032	0	0	0	0	0	1	0	0	1	0	0	0	0	0	0	2013/12/31	82.4	82.4	82.4	82.4	0	0	0	0	0	0	0	0
388	2001	0	5.3032	0	0	0	0	0	0	0	0	0	0	0	0	0	0	0	2013/12/31	82.4667	82.4667	82.4667	82.4667	0	0	0	0	0	0	0	0
389	1999	1	5.3032	0	0	0	0	0	0	0	0	0	0	0	0	0	0	1	2013/12/31	116.867	116.867	116.867	116.867	0	0	0	0	0	0	0	0
390	2003	0	5.2977	0	0	0	0	0	1	1	0	0	0	0	0	0	0	1	2013/12/31	64.2	64.2	64.2	64.2	0	0	0	0	0	0	0	0
391	2003	0	5.2977	0	0	0	0	0	0	0	0	0	0	0	0	0	0	0	2013/12/31	64.3	64.3	64.3	64.3	0	0	0	0	0	0	0	0
392	2003	0	5.2977	0	0	0	0	0	0	0	0	0	0	0	0	0	0	1	2013/12/31	66.1333	66.1333	66.1333	66.1333	0	0	0	0	0	0	0	0
393	2003	0	5.2977	0	0	0	0	0	1	1	0	0	1	1	0	1	0	0	2013/12/31	66.2333	66.2333	66.2333	66.2333	0	0	0	0	0	0	0	0
394	2000	1	5.295	0	0	0	0	0	1	1	0	1	1	1	1	0	0	0	2013/12/31	103.7	103.7	103.7	103.7	0	0	0	0	0	0	0	0
395	2000	1	5.295	0	0	0	0	0	0	0	0	0	1	0	0	0	1	0	2013/12/31	103.7	103.7	103.7	103.7	0	0	0	0	0	0	0	0
396	2000	1	5.295	0	0	0	0	0	1	1	0	0	0	0	0	0	0	1	2013/12/31	103.967	103.967	103.967	103.967	0	0	0	0	0	0	0	0
397	1999	1	5.2923	0	0	0	0	0	1	1	0	1	0	0	0	0	0	1	2013/12/31	118	118	118	118	0	0	0	0	0	0	0	0
398	1999	1	5.2923	0	0	0	0	0	0	0	0	0	1	1	1	1	0	0	2013/12/31	118.033	118.033	118.033	118.033	0	0	0	0	0	0	0	0
399	1998	0	5.2895	0	0	0	0	0	1	0	0	1	0	0	0	0	0	1	2013/12/31	126.033	126.033	126.033	126.033	0	0	0	0	0	0	0	0
400	1998	0	5.2895	0	0	0	0	0	0	0	0	0	0	0	0	0	0	0	2013/12/31	126.233	126.233	126.233	126.233	0	0	0	0	0	0	0	0
401	1996	0	5.2786	0	0	0	0	0	0	0	0	0	0	0	0	0	0	1	2013/12/31	147.667	147.667	147.667	147.667	0	0	0	0	0	0	0	0
402	2002	1	5.2758	0	0	0	0	0	0	0	0	0	1	0	0	0	1	1	2013/12/31	70.5	70.5	70.5	70.5	0	0	0	0	0	0	0	0
403	1996	0	5.2758	0	0	0	0	0	0	0	0	0	0	0	0	0	0	1	2013/12/31	144.433	144.433	144.433	144.433	0	0	0	0	0	0	0	0
404	1996	0	5.2758	0	0	0	0	0	0	0	0	0	0	0	0	0	0	0	2013/12/31	144.533	144.533	144.533	144.533	0	0	0	0	0	0	0	0
405	1996	1	5.2758	0	0	0	0	0	0	0	0	0	0	0	0	0	0	0	2013/12/31	144.567	144.567	144.567	144.567	0	0	0	0	0	0	0	0
406	2001	0	5.2731	0	0	0	0	0	0	0	0	0	1	1	1	0	0	1	2013/12/31	90.8333	90.8333	90.8333	90.8333	0	0	0	0	0	0	0	0
407	2000	1	5.2731	0	0	0	0	0	1	1	0	0	0	0	0	0	0	1	2013/12/31	101.067	101.067	101.067	101.067	0	0	0	0	0	0	0	0
408	2005	1	5.2704	0	0	0	0	0	0	0	0	0	0	0	0	0	0	1	2013/12/31	39.2	39.2	39.2	39.2	0	0	0	0	0	0	0	0
409	2005	1	5.2704	0	0	0	0	0	0	0	0	0	1	0	0	0	1	0	2013/12/31	39.2333	39.2333	39.2333	39.2333	0	0	0	0	0	0	0	0
410	2001	1	5.2676	0	0	1	1	0	1	1	1	1	0	0	0	0	0	0	2007/03/12	1	1	8.8667	8.8667	1	1	0	0	1	1	0	0
411	2004	1	5.2676	0	0	0	0	0	0	0	0	0	0	0	0	0	0	1	2013/12/31	54.3667	54.3667	54.3667	54.3667	0	0	0	0	0	0	0	0
412	2001	1	5.2676	0	0	0	0	0	0	0	0	0	0	0	0	0	0	1	2013/12/31	91.9667	91.9667	91.9667	91.9667	0	0	0	0	0	0	0	0
413	2000	1	5.2676	0	0	0	0	0	0	0	0	0	0	0	0	0	0	1	2013/12/31	103	103	103	103	0	0	0	0	0	0	0	0
414	1997	1	5.2676	0	0	0	0	0	0	0	0	0	0	0	0	0	0	1	2013/12/31	137.567	137.567	137.567	137.567	0	0	0	0	0	0	0	0
415	1997	0	5.2676	0	0	0	0	0	0	0	0	0	0	0	0	0	0	0	2013/12/31	137.633	137.633	137.633	137.633	0	0	0	0	0	0	0	0
416	1997	0	5.2676	0	0	0	0	0	0	0	0	0	0	0	0	0	0	0	2013/12/31	137.7	137.7	137.7	137.7	0	0	0	0	0	0	0	0
417	2006	1	5.2649	0	0	0	0	0	1	1	0	0	0	0	0	0	0	1	2013/12/31	23.0333	23.0333	23.0333	23.0333	0	0	0	0	0	0	0	0
418	2006	1	5.2649	0	0	0	0	0	0	0	0	0	0	0	0	0	0	1	2013/12/31	32.1667	32.1667	32.1667	32.1667	0	0	0	0	0	0	0	0
419	2000	1	5.2649	0	0	0	0	0	0	0	0	0	1	1	1	0	0	1	2013/12/31	106.2	106.2	106.2	106.2	0	0	0	0	0	0	0	0
420	1997	1	5.2649	0	0	0	0	0	1	1	0	0	0	0	0	0	0	1	2013/12/31	132.633	132.633	132.633	132.633	0	0	0	0	0	0	0	0
421	2005	1	5.2594	0	0	0	0	0	0	0	0	0	1	1	0	1	1	0	2013/12/31	1.2333	1.2333	37.3333	37.3333	1	1	0	0	1	1	0	0
422	2007	1	5.2594	0	0	0	0	0	0	0	0	0	0	0	0	0	0	1	2013/12/31	15.1333	15.1333	15.1333	15.1333	0	0	0	0	0	0	0	0
423	2005	1	5.2594	0	0	1	0	0	1	1	0	1	0	0	0	0	0	1	2013/12/31	37.1333	37.1333	37.1333	37.1333	0	0	0	0	0	0	0	0
424	2001	1	5.2567	0	0	0	0	0	1	1	0	0	0	0	0	0	0	1	2013/12/31	94.0333	94.0333	94.0333	94.0333	0	0	0	0	0	0	0	0
425	2001	0	5.2567	0	0	1	0	0	1	1	1	0	1	1	1	0	0	0	2013/12/31	94.0667	94.0667	94.0667	94.0667	0	0	0	0	0	0	0	0
426	2002	1	5.2539	0	0	0	0	0	1	1	0	0	0	0	0	0	0	0	2013/12/31	80.8667	80.8667	80.8667	80.8667	0	0	0	0	0	0	0	0
427	2002	1	5.2539	0	0	0	0	0	0	0	0	0	0	0	0	0	0	1	2013/12/31	80.9333	80.9333	80.9333	80.9333	0	0	0	0	0	0	0	0
428	2001	0	5.2539	0	0	0	0	0	1	1	0	0	0	0	0	0	0	1	2013/12/31	83.8667	83.8667	83.8667	83.8667	0	0	0	0	0	0	0	0
429	1998	0	5.2539	0	0	0	1	0	1	1	1	1	1	0	0	0	1	1	2013/12/31	128.667	128.667	128.667	128.667	0	0	0	0	0	0	0	0
430	2001	1	5.2457	1	0	1	0	0	1	1	0	1	0	0	0	0	0	1	2013/12/31	85.9667	85.9667	85.9667	85.9667	0	0	0	0	0	0	0	0
431	2001	1	5.2457	0	0	0	0	0	1	0	0	1	1	1	1	0	0	0	2013/12/31	86.2	86.2	86.2	86.2	0	0	0	0	0	0	0	0
432	2004	0	5.243	0	0	0	0	0	0	0	0	0	0	0	0	0	0	1	2013/12/31	51.6667	51.6667	51.6667	51.6667	0	0	0	0	0	0	0	0
433	1999	0	5.243	0	0	0	0	0	0	0	0	0	0	0	0	0	0	0	2013/12/31	115.533	115.533	115.533	115.533	0	0	0	0	0	0	0	0
434	1999	0	5.243	0	0	0	0	0	0	0	0	0	0	0	0	0	0	0	2013/12/31	115.6	115.6	115.6	115.6	0	0	0	0	0	0	0	0
435	1999	1	5.243	0	0	0	0	0	0	0	0	0	0	0	0	0	0	1	2013/12/31	115.667	115.667	115.667	115.667	0	0	0	0	0	0	0	0
436	1999	1	5.243	0	0	0	0	0	0	0	0	0	0	0	0	0	0	0	2013/12/31	115.667	115.667	115.667	115.667	0	0	0	0	0	0	0	0
437	1999	1	5.243	0	0	0	0	0	1	1	0	0	0	0	0	0	0	0	2013/12/31	115.7	115.7	115.7	115.7	0	0	0	0	0	0	0	0
438	2006	0	5.2402	0	0	0	0	0	1	1	1	0	1	1	1	0	0	1	2013/12/31	33.3333	33.3333	33.3333	33.3333	0	0	0	0	0	0	0	0
439	1998	1	5.2375	1	0	1	0	0	1	1	0	0	1	1	1	0	0	1	2013/12/31	119.667	119.667	119.667	119.667	0	0	0	0	0	0	0	0
440	1996	1	5.2266	0	0	0	0	0	1	1	0	0	1	1	1	0	0	1	2013/12/31	151.167	151.167	151.167	151.167	0	0	0	0	0	0	0	0
441	1996	0	5.2266	0	0	0	0	0	0	0	0	0	0	0	0	0	0	0	2013/12/31	151.333	151.333	151.333	151.333	0	0	0	0	0	0	0	0
442	1996	1	5.2266	0	0	0	0	0	0	0	0	0	0	0	0	0	0	0	2013/12/31	151.467	151.467	151.467	151.467	0	0	0	0	0	0	0	0
443	2003	1	5.2238	0	0	0	0	0	0	0	0	0	0	0	0	0	0	1	2013/12/31	59	59	59	59	0	0	0	0	0	0	0	0
444	2001	1	5.2238	0	0	0	0	0	0	0	0	0	0	0	0	0	0	1	2013/12/31	87.3333	87.3333	87.3333	87.3333	0	0	0	0	0	0	0	0
445	2000	1	5.2238	0	0	0	0	0	0	0	0	0	0	0	0	0	0	1	2013/12/31	102.567	102.567	102.567	102.567	0	0	0	0	0	0	0	0
446	1998	0	5.2238	0	0	0	0	0	0	0	0	0	0	0	0	0	0	1	2013/12/31	125.967	125.967	125.967	125.967	0	0	0	0	0	0	0	0
447	1997	1	5.2238	0	0	0	1	0	1	1	0	0	0	0	0	0	0	0	2013/12/31	142.167	142.167	142.167	142.167	0	0	0	0	0	0	0	0
448	1997	0	5.2238	0	0	0	0	0	1	1	0	0	1	0	0	0	1	1	2013/12/31	142.167	142.167	142.167	142.167	0	0	0	0	0	0	0	0
449	1997	0	5.2238	0	0	0	0	0	0	0	0	0	0	0	0	0	0	0	2013/12/31	142.2	142.2	142.2	142.2	0	0	0	0	0	0	0	0
450	1997	1	5.2238	0	0	0	0	0	1	1	0	0	1	0	0	0	1	0	2013/12/31	142.267	142.267	142.267	142.267	0	0	0	0	0	0	0	0
451	2007	1	5.2156	0	0	0	0	0	0	0	0	0	0	0	0	0	0	0	2013/12/31	1.0333	1.0333	21.6	21.6	1	1	0	0	1	1	0	0
452	2007	0	5.2156	0	0	0	0	0	0	0	0	0	0	0	0	0	0	1	2013/12/31	21.5667	21.5667	21.5667	21.5667	0	0	0	0	0	0	0	0
453	2007	1	5.2156	0	0	0	0	0	1	1	0	0	0	0	0	0	0	0	2013/12/31	21.6	21.6	21.6	21.6	0	0	0	0	0	0	0	0
454	2004	1	5.2156	0	0	0	0	0	0	0	0	0	0	0	0	0	0	1	2013/12/31	55.1	55.1	55.1	55.1	0	0	0	0	0	0	0	0
455	2000	0	5.2156	0	0	0	0	0	0	0	0	0	0	0	0	0	0	1	2013/12/31	101.733	101.733	101.733	101.733	0	0	0	0	0	0	0	0
456	2000	1	5.2156	0	0	0	0	0	0	0	0	0	1	1	1	0	0	0	2013/12/31	101.767	101.767	101.767	101.767	0	0	0	0	0	0	0	0
457	2003	1	5.2101	0	0	0	0	0	0	0	0	0	0	0	0	0	0	1	2013/12/31	70.2	70.2	70.2	70.2	0	0	0	0	0	0	0	0
458	2003	0	5.2101	0	0	0	0	0	0	0	0	0	0	0	0	0	0	0	2013/12/31	70.3333	70.3333	70.3333	70.3333	0	0	0	0	0	0	0	0
459	1998	1	5.2101	0	0	0	0	0	1	1	0	0	0	0	0	0	0	1	2013/12/31	120.067	120.067	120.067	120.067	0	0	0	0	0	0	0	0
460	1997	1	5.2101	0	0	0	0	0	1	0	1	0	0	0	0	0	0	1	2013/12/31	138.333	138.333	138.333	138.333	0	0	0	0	0	0	0	0
461	1996	0	5.2101	0	0	0	0	0	0	0	0	0	0	0	0	0	0	1	2013/12/31	150.4	150.4	150.4	150.4	0	0	0	0	0	0	0	0
462	1996	1	5.2101	1	0	0	0	0	1	0	0	1	0	0	0	0	0	0	2013/12/31	150.6	150.6	150.6	150.6	0	0	0	0	0	0	0	0
463	2005	1	5.2074	0	0	0	0	0	1	1	1	0	1	1	1	0	0	1	2013/12/31	35.7333	35.7333	35.7333	35.7333	0	0	0	0	0	0	0	0
464	2005	1	5.2074	0	0	0	0	0	0	0	0	0	0	0	0	0	0	0	2013/12/31	36	36	36	36	0	0	0	0	0	0	0	0
465	2005	0	5.2019	0	0	0	0	0	0	0	0	0	1	1	1	0	0	1	2013/12/31	41.9667	41.9667	41.9667	41.9667	0	0	0	0	0	0	0	0
466	2002	1	5.1964	0	0	0	1	0	0	0	0	0	1	1	1	0	0	1	2013/12/31	78.5667	78.5667	78.5667	78.5667	0	0	0	0	0	0	0	0
467	2004	1	5.1937	0	0	0	0	0	0	0	0	0	0	0	0	0	0	1	2013/12/31	52.1667	52.1667	52.1667	52.1667	0	0	0	0	0	0	0	0
468	1997	1	5.1937	0	0	0	0	0	0	0	0	0	0	0	0	0	0	1	2013/12/31	138.633	138.633	138.633	138.633	0	0	0	0	0	0	0	0
469	1996	0	5.191	0	0	0	0	0	1	1	0	0	0	0	0	0	0	1	2013/12/31	150.567	150.567	150.567	150.567	0	0	0	0	0	0	0	0
470	1996	1	5.1882	0	0	0	0	0	0	0	0	0	0	0	0	0	0	1	2013/12/31	149.6	149.6	149.6	149.6	0	0	0	0	0	0	0	0
471	1996	1	5.1882	0	0	0	0	0	0	0	0	0	0	0	0	0	0	0	2013/12/31	149.833	149.833	149.833	149.833	0	0	0	0	0	0	0	0
472	2003	0	5.1855	0	0	0	0	0	0	0	0	0	0	0	0	0	0	1	2013/12/31	67.6333	67.6333	67.6333	67.6333	0	0	0	0	0	0	0	0
473	2000	1	5.1855	0	0	0	0	0	0	0	0	0	0	0	0	0	0	0	2013/12/31	96.0333	96.0333	96.0333	96.0333	0	0	0	0	0	0	0	0
474	2000	1	5.1855	0	0	0	0	0	1	0	0	1	0	0	0	0	0	1	2013/12/31	96.0333	96.0333	96.0333	96.0333	0	0	0	0	0	0	0	0
475	1998	1	5.1855	0	0	0	0	0	0	0	0	0	1	0	0	0	1	1	2013/12/31	122.267	122.267	122.267	122.267	0	0	0	0	0	0	0	0
476	1996	1	5.1855	0	0	0	0	0	0	0	0	0	0	0	0	0	0	1	2013/12/31	147.767	147.767	147.767	147.767	0	0	0	0	0	0	0	0
477	2002	1	5.18	0	0	0	0	0	1	0	1	1	1	1	1	0	0	1	2013/12/31	76.8	76.8	76.8	76.8	0	0	0	0	0	0	0	0
478	2000	0	5.18	0	0	0	0	0	0	0	0	0	0	0	0	0	0	1	2013/12/31	105.2	105.2	105.2	105.2	0	0	0	0	0	0	0	0
479	2002	0	5.1773	0	0	0	0	0	0	0	0	0	0	0	0	0	0	1	2013/12/31	82.9	82.9	82.9	82.9	0	0	0	0	0	0	0	0
480	2002	1	5.1773	0	0	0	0	0	1	1	0	0	0	0	0	0	0	0	2013/12/31	82.9667	82.9667	82.9667	82.9667	0	0	0	0	0	0	0	0
481	2002	1	5.1773	0	0	0	0	0	0	0	0	0	0	0	0	0	0	0	2013/12/31	83	83	83	83	0	0	0	0	0	0	0	0
482	1997	0	5.1745	0	0	0	0	0	0	0	0	0	0	0	0	0	0	0	2013/12/31	1.7	132.733	132.733	1.7	1	0	0	1	1	0	0	1
483	1997	1	5.1745	0	0	0	0	0	0	0	0	0	1	1	1	0	0	1	2013/12/31	132.633	132.633	132.633	132.633	0	0	0	0	0	0	0	0
484	1997	1	5.1745	0	0	0	0	0	0	0	0	0	1	0	0	0	1	0	2013/12/31	132.7	132.7	132.7	132.7	0	0	0	0	0	0	0	0
485	1997	1	5.1745	0	0	0	0	0	0	0	0	0	0	0	0	0	0	0	2013/12/31	132.7	132.7	132.7	132.7	0	0	0	0	0	0	0	0
486	1997	1	5.1718	0	0	0	0	0	0	0	0	0	0	0	0	0	0	1	2013/12/31	139.767	139.767	139.767	139.767	0	0	0	0	0	0	0	0
487	1997	1	5.1718	0	0	0	0	0	0	0	0	0	0	0	0	0	0	0	2013/12/31	139.867	139.867	139.867	139.867	0	0	0	0	0	0	0	0
488	1997	0	5.1718	0	0	0	0	0	0	0	0	0	0	0	0	0	0	0	2013/12/31	139.867	139.867	139.867	139.867	0	0	0	0	0	0	0	0
489	1996	1	5.1691	0	0	0	0	0	1	1	0	0	0	0	0	0	0	1	2013/12/31	149.9	149.9	149.9	149.9	0	0	0	0	0	0	0	0
490	2001	0	5.1663	0	0	0	0	0	0	0	0	0	0	0	0	0	0	0	2013/12/31	7.2667	95.2333	95.2333	7.2667	1	0	0	1	1	0	0	1
491	2001	1	5.1663	0	0	0	0	0	0	0	0	0	0	0	0	0	0	0	2013/12/31	95.2	95.2	95.2	95.2	0	0	0	0	0	0	0	0
492	2001	0	5.1663	0	0	0	0	0	0	0	0	0	0	0	0	0	0	0	2013/12/31	95.2333	95.2333	95.2333	95.2333	0	0	0	0	0	0	0	0
493	2001	1	5.1663	0	0	0	0	0	0	0	0	0	0	0	0	0	0	1	2013/12/31	95.3333	95.3333	95.3333	95.3333	0	0	0	0	0	0	0	0
494	2005	1	5.1608	0	0	0	0	0	0	0	0	0	0	0	0	0	0	1	2013/12/31	37.4	37.4	37.4	37.4	0	0	0	0	0	0	0	0
495	2004	0	5.1581	0	0	0	0	0	0	0	0	0	0	0	0	0	0	1	2013/12/31	51.6667	51.6667	51.6667	51.6667	0	0	0	0	0	0	0	0
496	1996	1	5.1581	0	0	0	0	0	0	0	0	0	0	0	0	0	0	1	2013/12/31	154.067	154.067	154.067	154.067	0	0	0	0	0	0	0	0
497	2000	1	5.1554	0	0	0	0	0	0	0	0	0	0	0	0	0	0	1	2012/10/31	92.3333	92.3333	92.3333	92.3333	0	0	0	0	0	0	0	0
498	2002	1	5.1526	0	0	0	0	0	0	0	0	0	0	0	0	0	0	1	2013/12/31	80.2333	80.2333	80.2333	80.2333	0	0	0	0	0	0	0	0
499	2002	0	5.1389	0	0	0	0	0	0	0	0	0	0	0	0	0	0	1	2013/12/31	73.0667	73.0667	73.0667	73.0667	0	0	0	0	0	0	0	0
500	2002	1	5.1389	0	0	0	0	0	0	0	0	0	0	0	0	0	0	0	2013/12/31	73.3	73.3	73.3	73.3	0	0	0	0	0	0	0	0
501	2000	1	5.1389	0	0	0	0	0	0	0	0	0	1	1	1	0	0	1	2013/12/31	99.6	99.6	99.6	99.6	0	0	0	0	0	0	0	0
502	2001	0	5.1362	0	0	0	0	0	0	0	0	0	0	0	0	0	0	1	2013/12/31	90.4667	90.4667	90.4667	90.4667	0	0	0	0	0	0	0	0
503	2001	1	5.1362	0	0	0	0	0	0	0	0	0	0	0	0	0	0	0	2013/12/31	90.5667	90.5667	90.5667	90.5667	0	0	0	0	0	0	0	0
504	1996	1	5.1362	0	0	0	0	0	1	1	1	0	0	0	0	0	0	0	2013/12/31	146.267	146.267	146.267	146.267	0	0	0	0	0	0	0	0
505	1999	0	5.128	1	0	0	0	0	0	0	0	0	0	0	0	0	0	1	2013/12/31	112.867	112.867	112.867	112.867	0	0	0	0	0	0	0	0
506	1999	1	5.128	0	0	0	0	0	0	0	0	0	1	0	0	0	1	0	2013/12/31	112.967	112.967	112.967	112.967	0	0	0	0	0	0	0	0
507	2001	1	5.1253	0	0	0	0	0	0	0	0	0	0	0	0	0	0	1	2013/12/31	93.7667	93.7667	93.7667	93.7667	0	0	0	0	0	0	0	0
508	2001	1	5.1253	0	0	0	0	0	0	0	0	0	0	0	0	0	0	0	2013/12/31	93.8	93.8	93.8	93.8	0	0	0	0	0	0	0	0
509	2006	0	5.1225	0	0	0	0	0	1	1	0	0	1	1	1	0	0	1	2013/12/31	23.6667	23.6667	23.6667	23.6667	0	0	0	0	0	0	0	0
510	2006	1	5.1225	0	0	1	0	0	1	1	0	1	0	0	0	0	0	0	2013/12/31	23.8	23.8	23.8	23.8	0	0	0	0	0	0	0	0
511	2000	0	5.1225	0	0	0	0	0	0	0	0	0	0	0	0	0	0	0	2013/12/31	96.7333	96.7333	96.7333	96.7333	0	0	0	0	0	0	0	0
512	2000	0	5.1225	0	0	0	0	0	0	0	0	0	0	0	0	0	0	1	2013/12/31	96.7333	96.7333	96.7333	96.7333	0	0	0	0	0	0	0	0
513	2000	1	5.1225	0	0	0	0	0	1	1	0	0	0	0	0	0	0	0	2013/12/31	96.8333	96.8333	96.8333	96.8333	0	0	0	0	0	0	0	0
514	1996	1	5.1225	0	0	0	0	0	1	0	0	1	0	0	0	0	0	1	2013/12/31	151.533	151.533	151.533	151.533	0	0	0	0	0	0	0	0
515	1996	0	5.1225	0	0	0	0	0	0	0	0	0	1	1	1	0	0	0	2013/12/31	151.633	151.633	151.633	151.633	0	0	0	0	0	0	0	0
516	1996	1	5.1225	0	0	0	0	0	0	0	0	0	0	0	0	0	0	0	2013/12/31	151.667	151.667	151.667	151.667	0	0	0	0	0	0	0	0
517	1998	0	5.1198	0	0	0	0	0	0	0	0	0	0	0	0	0	0	1	2013/12/31	128.267	128.267	128.267	128.267	0	0	0	0	0	0	0	0
518	1998	0	5.1198	0	0	0	0	0	0	0	0	0	0	0	0	0	0	1	2013/12/31	131.267	131.267	131.267	131.267	0	0	0	0	0	0	0	0
519	1998	0	5.1198	1	0	0	0	0	1	1	1	0	0	0	0	0	0	0	2013/12/31	131.333	131.333	131.333	131.333	0	0	0	0	0	0	0	0
520	2003	1	5.117	0	0	0	0	0	1	0	0	1	0	0	0	0	0	1	2013/12/31	68.1667	68.1667	68.1667	68.1667	0	0	0	0	0	0	0	0
521	2001	0	5.117	0	0	0	0	0	0	0	0	0	0	0	0	0	0	1	2013/12/31	86.7	86.7	86.7	86.7	0	0	0	0	0	0	0	0
522	2003	0	5.1143	0	0	0	0	0	1	1	0	0	0	0	0	0	0	1	2013/12/31	65.3667	65.3667	65.3667	65.3667	0	0	0	0	0	0	0	0
523	2002	0	5.1143	0	0	0	0	0	0	0	0	0	1	1	1	0	0	1	2013/12/31	81.5667	81.5667	81.5667	81.5667	0	0	0	0	0	0	0	0
524	1998	1	5.1143	0	0	0	0	0	0	0	0	0	0	0	0	0	0	1	2013/12/31	132.3	132.3	132.3	132.3	0	0	0	0	0	0	0	0
525	2001	1	5.1116	0	0	0	0	0	0	0	0	0	0	0	0	0	0	0	2013/12/31	1.6	8.2667	93.9	1.6	1	1	0	1	1	1	0	1
526	2001	1	5.1116	0	0	0	0	0	0	0	0	0	0	0	0	0	0	1	2013/12/31	93.7	93.7	93.7	93.7	0	0	0	0	0	0	0	0
527	2006	1	5.1088	0	0	0	0	0	0	0	0	0	0	0	0	0	0	1	2013/12/31	27.9333	27.9333	27.9333	27.9333	0	0	0	0	0	0	0	0
528	2006	1	5.1088	0	0	0	0	0	0	0	0	0	0	0	0	0	0	0	2013/12/31	28.0333	28.0333	28.0333	28.0333	0	0	0	0	0	0	0	0
529	1998	0	5.1088	0	0	0	0	0	0	0	0	0	0	0	0	0	0	0	2009/01/29	71.4667	71.4667	71.4667	71.4667	0	0	0	0	0	0	0	0
530	1998	0	5.1088	0	0	0	0	0	0	0	0	0	0	0	0	0	0	1	2013/12/31	131.467	131.467	131.467	131.467	0	0	0	0	0	0	0	0
531	2000	1	5.1034	0	0	0	0	0	0	0	0	0	0	0	0	0	0	1	2013/12/31	108	108	108	108	0	0	0	0	0	0	0	0
532	2003	1	5.1006	0	0	0	0	0	0	0	0	0	0	0	0	0	0	0	2013/12/31	70.5333	70.5333	70.5333	70.5333	0	0	0	0	0	0	0	0
533	2003	1	5.1006	0	0	0	0	0	0	0	0	0	0	0	0	0	0	1	2013/12/31	70.6	70.6	70.6	70.6	0	0	0	0	0	0	0	0
534	2000	1	5.1006	0	0	0	0	0	0	0	0	0	0	0	0	0	0	1	2013/12/31	102.9	102.9	102.9	102.9	0	0	0	0	0	0	0	0
535	2000	1	5.1006	0	0	0	0	0	1	1	0	0	0	0	0	0	0	0	2013/12/31	103.133	103.133	103.133	103.133	0	0	0	0	0	0	0	0
536	2000	1	5.1006	0	0	0	0	0	0	0	0	0	0	0	0	0	0	0	2013/12/31	103.233	103.233	103.233	103.233	0	0	0	0	0	0	0	0
537	1999	0	5.1006	0	0	0	0	0	0	0	0	0	1	0	0	0	1	1	2013/12/31	118.367	118.367	118.367	118.367	0	0	0	0	0	0	0	0
538	1996	1	5.1006	0	0	0	0	0	0	0	0	0	0	0	0	0	0	0	2013/12/31	148.8	148.8	148.8	148.8	0	0	0	0	0	0	0	0
539	1996	1	5.1006	0	0	0	0	0	0	0	0	0	0	0	0	0	0	1	2013/12/31	148.833	148.833	148.833	148.833	0	0	0	0	0	0	0	0
540	2000	1	5.0979	0	0	0	0	0	0	0	0	0	1	1	1	0	0	1	2013/12/31	3.3667	4.5667	103.167	3.3667	1	1	0	1	1	1	0	1
541	1997	1	5.0951	0	0	0	0	0	1	0	0	1	0	0	0	0	0	0	2013/12/31	137.7	137.7	137.7	137.7	0	0	0	0	0	0	0	0
542	1997	1	5.0951	0	0	0	0	0	1	1	0	0	1	1	1	0	0	1	2013/12/31	137.7	137.7	137.7	137.7	0	0	0	0	0	0	0	0
543	2007	1	5.0924	0	0	0	0	0	0	0	0	0	0	0	0	0	0	1	2013/12/31	21.0333	21.0333	21.0333	21.0333	0	0	0	0	0	0	0	0
544	2002	0	5.0897	0	0	0	0	0	0	0	0	0	1	0	0	0	1	1	2013/12/31	80.8667	80.8667	80.8667	80.8667	0	0	0	0	0	0	0	0
545	2002	0	5.0897	1	0	0	0	0	0	0	0	0	0	0	0	0	0	0	2013/12/31	81.0667	81.0667	81.0667	81.0667	0	0	0	0	0	0	0	0
546	2000	1	5.0897	0	0	0	0	0	0	0	0	0	1	1	1	0	0	0	2013/12/31	99.1667	99.1667	99.1667	99.1667	0	0	0	0	0	0	0	0
547	2000	1	5.0897	0	0	0	0	0	1	1	0	0	0	0	0	0	0	1	2013/12/31	99.2	99.2	99.2	99.2	0	0	0	0	0	0	0	0
548	1999	0	5.0842	0	0	0	0	0	0	0	0	0	0	0	0	0	0	0	2013/12/31	10.6	10.6	119.533	119.533	1	1	0	0	1	1	0	0
549	2003	1	5.0842	0	0	0	0	0	0	0	0	0	0	0	0	0	0	1	2013/12/31	65.3333	65.3333	65.3333	65.3333	0	0	0	0	0	0	0	0
550	1999	1	5.0842	0	0	0	0	0	0	0	0	0	0	0	0	0	0	0	2013/12/31	119.6	119.6	119.6	119.6	0	0	0	0	0	0	0	0
551	1999	0	5.0842	0	0	0	0	0	0	0	0	0	0	0	0	0	0	0	2013/12/31	119.6	119.6	119.6	119.6	0	0	0	0	0	0	0	0
552	2000	0	5.0815	0	0	0	0	0	1	1	0	1	1	1	1	0	0	1	2013/12/31	98.4	98.4	98.4	98.4	0	0	0	0	0	0	0	0
553	1999	1	5.0815	0	0	0	0	0	1	0	0	1	0	0	0	0	0	1	2013/12/31	113.4	113.4	113.4	113.4	0	0	0	0	0	0	0	0
554	2007	0	5.0787	0	0	0	0	0	0	0	0	0	0	0	0	0	0	0	2013/12/31	2.2	2.2	14.2	14.2	1	1	0	0	1	1	0	0
555	2007	0	5.0787	0	0	0	0	0	0	0	0	0	0	0	0	0	0	1	2013/12/31	14.0333	14.0333	14.0333	14.0333	0	0	0	0	0	0	0	0
556	2007	1	5.0787	0	0	0	0	0	0	0	0	0	1	1	0	1	0	0	2013/12/31	14.1333	14.1333	14.1333	14.1333	0	0	0	0	0	0	0	0
557	1997	1	5.0732	0	0	0	0	0	0	0	0	0	0	0	0	0	0	1	2013/12/31	7.9667	7.9667	141.1	141.1	1	1	0	0	1	1	0	0
558	2006	0	5.0705	0	0	0	0	0	0	0	0	0	0	0	0	0	0	1	2013/12/31	27.3667	27.3667	27.3667	27.3667	0	0	0	0	0	0	0	0
559	2007	0	5.0678	0	0	0	0	0	0	0	0	0	0	0	0	0	0	1	2013/12/31	19.2667	19.2667	19.2667	19.2667	0	0	0	0	0	0	0	0
560	2007	0	5.0678	0	0	0	0	0	0	0	0	0	1	1	0	1	1	0	2013/12/31	19.3667	19.3667	19.3667	19.3667	0	0	0	0	0	0	0	0
561	2002	0	5.065	0	0	0	0	0	0	0	0	0	0	0	0	0	0	0	2013/12/31	75.2	75.2	75.2	75.2	0	0	0	0	0	0	0	0
562	2001	1	5.0623	0	0	0	0	0	0	0	0	0	0	0	0	0	0	1	2013/12/31	96.4667	96.4667	96.4667	96.4667	0	0	0	0	0	0	0	0
563	2001	1	5.0623	0	0	0	0	0	1	1	1	0	0	0	0	0	0	0	2013/12/31	96.5333	96.5333	96.5333	96.5333	0	0	0	0	0	0	0	0
564	1998	1	5.0595	0	0	0	0	0	0	0	0	0	1	1	1	0	0	1	2013/12/31	123.867	123.867	123.867	123.867	0	0	0	0	0	0	0	0
565	1998	1	5.0595	0	0	0	0	0	0	0	0	0	0	0	0	0	0	0	2013/12/31	124.033	124.033	124.033	124.033	0	0	0	0	0	0	0	0
566	1999	1	5.0568	0	0	0	0	0	0	0	0	0	0	0	0	0	0	1	2013/12/31	114.733	114.733	114.733	114.733	0	0	0	0	0	0	0	0
567	2007	0	5.0541	0	0	0	0	0	0	0	0	0	0	0	0	0	0	1	2013/12/31	15.4	15.4	15.4	15.4	0	0	0	0	0	0	0	0
568	1996	1	5.0541	0	0	0	0	0	0	0	0	0	0	0	0	0	0	0	2013/12/31	154.1	154.1	154.1	154.1	0	0	0	0	0	0	0	0
569	1996	1	5.0541	0	0	0	0	0	1	1	1	1	0	0	0	0	0	1	2013/12/31	154.267	154.267	154.267	154.267	0	0	0	0	0	0	0	0
570	2006	0	5.0513	0	0	0	0	0	0	0	0	0	1	0	0	0	1	1	2013/12/31	35.6	35.6	35.6	35.6	0	0	0	0	0	0	0	0
571	2007	1	5.0486	0	0	0	0	0	0	0	0	0	1	1	1	0	0	1	2013/12/31	9.2667	9.2667	13.4667	13.4667	1	1	0	0	1	1	0	0
572	2007	1	5.0486	0	0	0	0	0	0	0	0	0	0	0	0	0	0	0	2013/12/31	13.5	13.5	13.5	13.5	0	0	0	0	0	0	0	0
573	1998	0	5.0459	0	0	0	0	0	0	0	0	0	0	0	0	0	0	1	2013/12/31	130.067	130.067	130.067	130.067	0	0	0	0	0	0	0	0
574	1998	0	5.0459	0	0	0	0	0	0	0	0	0	0	0	0	0	0	1	2013/12/31	130.167	130.167	130.167	130.167	0	0	0	0	0	0	0	0
575	1998	1	5.0459	0	0	0	0	0	0	0	0	0	0	0	0	0	0	0	2013/12/31	130.2	130.2	130.2	130.2	0	0	0	0	0	0	0	0
576	1998	1	5.0459	0	0	0	0	0	0	0	0	0	0	0	0	0	0	0	2013/12/31	130.233	130.233	130.233	130.233	0	0	0	0	0	0	0	0
577	2000	1	5.0404	0	0	0	0	0	1	1	0	0	0	0	0	0	0	1	2013/12/31	104.933	104.933	104.933	104.933	0	0	0	0	0	0	0	0
578	1997	1	5.0404	0	0	0	0	0	0	0	0	0	0	0	0	0	0	0	2013/12/31	143.5	143.5	143.5	143.5	0	0	0	0	0	0	0	0
579	1997	1	5.0404	0	0	0	0	0	1	0	0	1	0	0	0	0	0	1	2013/12/31	143.5	143.5	143.5	143.5	0	0	0	0	0	0	0	0
580	1996	0	5.0404	1	0	1	0	0	1	1	0	0	0	0	0	0	0	1	2013/12/31	156.5	156.5	156.5	156.5	0	0	0	0	0	0	0	0
581	2003	1	5.0376	0	0	0	0	0	0	0	0	0	1	1	0	1	0	1	2013/12/31	63.3	63.3	63.3	63.3	0	0	0	0	0	0	0	0
582	2003	1	5.0376	0	0	0	0	0	0	0	0	0	0	0	0	0	0	0	2013/12/31	63.3667	63.3667	63.3667	63.3667	0	0	0	0	0	0	0	0
583	2003	1	5.0376	0	0	0	0	0	0	0	0	0	0	0	0	0	0	0	2013/12/31	63.4333	63.4333	63.4333	63.4333	0	0	0	0	0	0	0	0
584	2003	0	5.0376	0	0	0	0	0	0	0	0	0	1	0	0	0	1	1	2013/12/31	64.3667	64.3667	64.3667	64.3667	0	0	0	0	0	0	0	0
585	2002	0	5.0376	0	0	0	0	0	0	0	0	0	0	0	0	0	0	1	2013/12/31	79.5333	79.5333	79.5333	79.5333	0	0	0	0	0	0	0	0
586	2002	0	5.0376	0	0	0	0	0	1	1	1	0	0	0	0	0	0	0	2013/12/31	79.5667	79.5667	79.5667	79.5667	0	0	0	0	0	0	0	0
587	2002	0	5.0349	0	0	0	0	0	1	1	0	0	0	0	0	0	0	1	2013/12/31	83.5667	83.5667	83.5667	83.5667	0	0	0	0	0	0	0	0
588	2000	1	5.0322	0	0	0	0	0	1	1	1	1	0	0	0	0	0	0	2013/12/31	3.9	99.9	3.9	3.9	1	0	1	1	1	0	1	1
589	2001	1	5.0322	0	0	0	0	0	0	0	0	0	1	1	1	0	0	1	2013/12/31	86.5333	86.5333	86.5333	86.5333	0	0	0	0	0	0	0	0
590	2001	0	5.0322	0	0	0	0	0	0	0	0	0	0	0	0	0	0	0	2013/12/31	86.6667	86.6667	86.6667	86.6667	0	0	0	0	0	0	0	0
591	2000	1	5.0322	0	0	1	0	0	0	0	0	0	1	1	1	0	0	1	2013/12/31	99.8333	99.8333	99.8333	99.8333	0	0	0	0	0	0	0	0
592	2003	1	5.0294	0	0	0	0	0	1	1	0	1	0	0	0	0	0	1	2013/12/31	67.3	67.3	67.3	67.3	0	0	0	0	0	0	0	0
593	1999	1	5.0267	0	0	0	0	0	0	0	0	0	0	0	0	0	0	1	2013/12/31	116.867	116.867	116.867	116.867	0	0	0	0	0	0	0	0
594	1999	1	5.0267	0	0	0	0	0	0	0	0	0	1	1	1	0	0	0	2013/12/31	117.267	117.267	117.267	117.267	0	0	0	0	0	0	0	0
595	1997	1	5.0212	0	0	0	0	0	1	0	0	1	0	0	0	0	0	1	2013/12/31	138.533	138.533	138.533	138.533	0	0	0	0	0	0	0	0
596	1997	1	5.0212	0	0	1	0	0	0	0	0	0	0	0	0	0	0	0	2013/12/31	138.7	138.7	138.7	138.7	0	0	0	0	0	0	0	0
597	2002	1	5.0157	0	0	0	0	0	0	0	0	0	0	0	0	0	0	1	2013/12/31	78.8667	78.8667	78.8667	78.8667	0	0	0	0	0	0	0	0
598	2002	1	5.0157	0	0	0	0	0	0	0	0	0	0	0	0	0	0	0	2013/12/31	78.9333	78.9333	78.9333	78.9333	0	0	0	0	0	0	0	0
599	2003	1	4.9993	0	0	0	0	0	1	1	0	0	1	1	1	0	0	1	2013/12/31	70.8667	70.8667	70.8667	70.8667	0	0	0	0	0	0	0	0
600	1999	1	4.9993	0	0	0	0	0	1	1	1	1	0	0	0	0	0	1	2013/12/31	116.467	116.467	116.467	116.467	0	0	0	0	0	0	0	0
601	1999	1	4.9993	0	0	0	0	0	0	0	0	0	0	0	0	0	0	0	2013/12/31	116.667	116.667	116.667	116.667	0	0	0	0	0	0	0	0
602	1998	0	4.9993	0	0	0	0	0	0	0	0	0	0	0	0	0	0	1	2013/12/31	132.633	132.633	132.633	132.633	0	0	0	0	0	0	0	0
603	2003	1	4.9938	0	0	0	0	0	0	0	0	0	0	0	0	0	0	0	2013/12/31	67.8	67.8	67.8	67.8	0	0	0	0	0	0	0	0
604	2003	1	4.9938	0	0	0	0	0	0	0	0	0	0	0	0	0	0	0	2013/12/31	67.8333	67.8333	67.8333	67.8333	0	0	0	0	0	0	0	0
605	2003	0	4.9938	0	0	0	0	0	1	0	1	0	1	1	0	1	0	1	2013/12/31	67.8333	67.8333	67.8333	67.8333	0	0	0	0	0	0	0	0
606	2004	0	4.9911	0	0	0	0	0	1	1	0	1	1	1	1	0	0	1	2013/12/31	49.6667	49.6667	49.6667	49.6667	0	0	0	0	0	0	0	0
607	2004	0	4.9911	0	0	0	0	0	0	0	0	0	0	0	0	0	0	0	2013/12/31	49.7	49.7	49.7	49.7	0	0	0	0	0	0	0	0
608	2004	1	4.9911	0	0	0	0	0	0	0	0	0	0	0	0	0	0	0	2013/12/31	49.7333	49.7333	49.7333	49.7333	0	0	0	0	0	0	0	0
609	2007	1	4.9884	0	0	0	0	0	0	0	0	0	0	0	0	0	0	1	2013/12/31	16.2	16.2	16.2	16.2	0	0	0	0	0	0	0	0
610	1997	1	4.9884	0	0	0	0	0	0	0	0	0	1	1	1	0	0	0	2013/12/31	134.967	134.967	134.967	134.967	0	0	0	0	0	0	0	0
611	1997	1	4.9884	0	0	0	0	0	0	0	0	0	0	0	0	0	0	0	2013/12/31	134.967	134.967	134.967	134.967	0	0	0	0	0	0	0	0
612	1997	1	4.9884	0	0	0	0	0	0	0	0	0	0	0	0	0	0	0	2013/12/31	134.967	134.967	134.967	134.967	0	0	0	0	0	0	0	0
613	1997	1	4.9884	0	0	0	0	0	0	0	0	0	0	0	0	0	0	0	2013/12/31	134.967	134.967	134.967	134.967	0	0	0	0	0	0	0	0
614	1997	1	4.9884	0	0	0	0	0	0	0	0	0	0	0	0	0	0	1	2013/12/31	134.967	134.967	134.967	134.967	0	0	0	0	0	0	0	0
615	2000	1	4.9856	0	0	0	0	0	0	0	0	0	0	0	0	0	0	0	2013/12/31	100.5	100.5	100.5	100.5	0	0	0	0	0	0	0	0
616	2000	1	4.9856	0	0	0	0	0	0	0	0	0	0	0	0	0	0	0	2013/12/31	100.5	100.5	100.5	100.5	0	0	0	0	0	0	0	0
617	2000	0	4.9856	0	0	0	0	0	0	0	0	0	0	0	0	0	0	1	2013/12/31	100.533	100.533	100.533	100.533	0	0	0	0	0	0	0	0
618	1999	1	4.9856	0	0	0	0	0	0	0	0	0	0	0	0	0	0	1	2013/12/31	121.767	121.767	121.767	121.767	0	0	0	0	0	0	0	0
619	1999	1	4.9856	0	0	0	0	0	0	0	0	0	0	0	0	0	0	0	2013/12/31	121.8	121.8	121.8	121.8	0	0	0	0	0	0	0	0
620	1999	1	4.9856	0	0	0	0	0	0	0	0	0	1	1	0	1	0	0	2013/12/31	121.833	121.833	121.833	121.833	0	0	0	0	0	0	0	0
621	2005	0	4.9829	0	0	0	0	0	1	0	0	1	0	0	0	0	0	0	2013/12/31	1.3333	1.3333	44.7667	44.7667	1	1	0	0	1	1	0	0
622	2002	1	4.9829	0	0	1	0	0	1	1	0	1	0	0	0	0	0	0	2013/12/31	7.4667	7.4667	82.3667	82.3667	1	1	0	0	1	1	0	0
623	2005	0	4.9829	0	0	0	0	0	1	0	0	1	0	0	0	0	0	1	2013/12/31	44.6	44.6	44.6	44.6	0	0	0	0	0	0	0	0
624	2002	1	4.9829	0	0	0	0	0	0	0	0	0	0	0	0	0	0	1	2013/12/31	82.2667	82.2667	82.2667	82.2667	0	0	0	0	0	0	0	0
625	2000	1	4.9802	0	0	0	0	0	0	0	0	0	0	0	0	0	0	0	2013/12/31	6.9333	6.9333	99.5667	99.5667	1	1	0	0	1	1	0	0
626	2007	1	4.9802	0	0	0	0	0	0	0	0	0	1	1	1	0	0	1	2013/12/31	18.3	18.3	18.3	18.3	0	0	0	0	0	0	0	0
627	2002	1	4.9802	0	0	0	0	0	0	0	0	0	0	0	0	0	0	0	2013/12/31	85.2667	85.2667	85.2667	85.2667	0	0	0	0	0	0	0	0
628	2002	1	4.9802	0	0	0	0	0	0	0	0	0	0	0	0	0	0	1	2013/12/31	85.3333	85.3333	85.3333	85.3333	0	0	0	0	0	0	0	0
629	2001	1	4.9802	0	0	0	0	0	0	0	0	0	0	0	0	0	0	1	2013/12/31	95.4	95.4	95.4	95.4	0	0	0	0	0	0	0	0
630	2001	0	4.9802	1	0	0	0	0	0	0	0	0	0	0	0	0	0	0	2013/12/31	95.5333	95.5333	95.5333	95.5333	0	0	0	0	0	0	0	0
631	2000	1	4.9802	0	0	1	0	0	0	0	0	0	0	0	0	0	0	1	2013/12/31	99.3333	99.3333	99.3333	99.3333	0	0	0	0	0	0	0	0
632	2000	1	4.9802	0	0	0	0	0	0	0	0	0	0	0	0	0	0	1	2013/12/31	101.433	101.433	101.433	101.433	0	0	0	0	0	0	0	0
633	2000	0	4.9802	0	0	0	0	0	1	1	0	0	1	1	1	0	0	0	2013/12/31	101.533	101.533	101.533	101.533	0	0	0	0	0	0	0	0
634	2003	0	4.9774	0	0	0	0	0	1	0	0	1	0	0	0	0	0	0	2013/12/31	66.0333	66.0333	66.0333	66.0333	0	0	0	0	0	0	0	0
635	2003	0	4.9774	1	0	0	0	0	0	0	0	0	0	0	0	0	0	1	2013/12/31	66.1	66.1	66.1	66.1	0	0	0	0	0	0	0	0
636	2000	0	4.9774	0	0	0	0	0	1	1	0	0	0	0	0	0	0	0	2013/12/31	103.433	103.433	103.433	103.433	0	0	0	0	0	0	0	0
637	2000	1	4.9774	0	0	0	0	0	0	0	0	0	0	0	0	0	0	1	2013/12/31	103.5	103.5	103.5	103.5	0	0	0	0	0	0	0	0
638	2000	1	4.9747	0	0	0	0	0	1	1	0	1	1	1	1	0	0	0	2013/12/31	104.567	104.567	104.567	104.567	0	0	0	0	0	0	0	0
639	2000	0	4.9747	0	0	0	0	0	1	0	0	1	0	0	0	0	0	0	2013/12/31	104.7	104.7	104.7	104.7	0	0	0	0	0	0	0	0
640	2000	0	4.9747	0	0	0	0	0	0	0	0	0	0	0	0	0	0	1	2013/12/31	104.733	104.733	104.733	104.733	0	0	0	0	0	0	0	0
641	2007	0	4.9692	0	0	0	0	0	0	0	0	0	0	0	0	0	0	1	2013/12/31	13.3	13.3	13.3	13.3	0	0	0	0	0	0	0	0
642	2007	1	4.9692	0	0	0	0	0	1	0	0	1	0	0	0	0	0	0	2013/12/31	13.4333	13.4333	13.4333	13.4333	0	0	0	0	0	0	0	0
643	2002	0	4.9665	0	0	0	0	0	1	0	1	0	0	0	0	0	0	1	2013/12/31	77.4	77.4	77.4	77.4	0	0	0	0	0	0	0	0
644	1999	0	4.9637	0	0	0	0	0	0	0	0	0	0	0	0	0	0	1	2013/12/31	114.833	114.833	114.833	114.833	0	0	0	0	0	0	0	0
645	1999	0	4.9637	0	0	0	0	0	0	0	0	0	0	0	0	0	0	0	2013/12/31	115.033	115.033	115.033	115.033	0	0	0	0	0	0	0	0
646	1999	0	4.9637	0	0	0	0	0	1	1	0	0	1	1	1	0	0	1	2013/12/31	117.967	117.967	117.967	117.967	0	0	0	0	0	0	0	0
647	2007	1	4.961	0	0	1	0	0	1	1	0	1	1	1	1	0	0	1	2013/12/31	18.7	18.7	18.7	18.7	0	0	0	0	0	0	0	0
648	2007	1	4.961	0	0	0	0	0	0	0	0	0	1	1	1	0	0	0	2013/12/31	18.7333	18.7333	18.7333	18.7333	0	0	0	0	0	0	0	0
649	2004	1	4.961	0	0	0	0	0	0	0	0	0	0	0	0	0	0	1	2013/12/31	50.0667	50.0667	50.0667	50.0667	0	0	0	0	0	0	0	0
650	2001	0	4.9582	0	0	0	0	0	0	0	0	0	0	0	0	0	0	1	2013/12/31	92.5667	92.5667	92.5667	92.5667	0	0	0	0	0	0	0	0
651	2000	0	4.9528	0	0	0	0	0	0	0	0	0	0	0	0	0	0	0	2013/12/31	107	107	107	107	0	0	0	0	0	0	0	0
652	2000	1	4.9528	0	0	0	0	0	0	0	0	0	0	0	0	0	0	1	2013/12/31	107	107	107	107	0	0	0	0	0	0	0	0
653	1996	1	4.95	0	0	0	0	0	1	0	1	0	0	0	0	0	0	1	2013/12/31	157.633	157.633	157.633	157.633	0	0	0	0	0	0	0	0
654	1996	1	4.95	0	0	0	0	0	0	0	0	0	0	0	0	0	0	0	2013/12/31	157.733	157.733	157.733	157.733	0	0	0	0	0	0	0	0
655	2003	0	4.9473	0	0	1	0	0	1	1	1	1	1	1	0	1	0	0	2013/12/31	0.9333	64.4333	0.9333	0.9333	0	0	0	0	1	0	1	1
656	1997	0	4.9473	0	0	0	0	0	0	0	0	0	1	1	0	1	0	0	2013/12/31	8.1	141.5	8.1	8.1	1	0	1	1	1	0	1	1
657	2006	1	4.9473	0	0	0	0	0	0	0	0	0	0	0	0	0	0	1	2013/12/31	36.8667	36.8667	36.8667	36.8667	0	0	0	0	0	0	0	0
658	2003	1	4.9473	0	0	0	0	0	0	0	0	0	0	0	0	0	0	1	2013/12/31	64.2667	64.2667	64.2667	64.2667	0	0	0	0	0	0	0	0
659	1999	0	4.9473	0	0	0	0	0	0	0	0	0	0	0	0	0	0	0	2013/12/31	120.2	120.2	120.2	120.2	0	0	0	0	0	0	0	0
660	1999	0	4.9473	0	0	0	0	0	1	1	0	0	0	0	0	0	0	1	2013/12/31	120.267	120.267	120.267	120.267	0	0	0	0	0	0	0	0
661	1997	0	4.9473	0	0	0	0	0	0	0	0	0	0	0	0	0	0	1	2013/12/31	141.567	141.567	141.567	141.567	0	0	0	0	0	0	0	0
662	1997	0	4.9473	0	0	0	0	0	0	0	0	0	0	0	0	0	0	0	2013/12/31	141.6	141.6	141.6	141.6	0	0	0	0	0	0	0	0
663	1997	0	4.9473	0	0	0	0	0	0	0	0	0	1	1	1	0	0	1	2013/12/31	142.567	142.567	142.567	142.567	0	0	0	0	0	0	0	0
664	2003	1	4.9446	0	0	0	0	0	1	1	0	1	1	1	1	0	0	0	2013/12/31	11.2667	11.2667	68.4	68.4	1	1	0	0	1	1	0	0
665	2003	1	4.9446	0	0	0	0	0	1	0	1	0	0	0	0	0	0	1	2013/12/31	68.5	68.5	68.5	68.5	0	0	0	0	0	0	0	0
666	2003	1	4.9446	0	0	0	0	0	0	0	0	0	0	0	0	0	0	0	2013/12/31	68.6333	68.6333	68.6333	68.6333	0	0	0	0	0	0	0	0
667	1997	1	4.9363	0	0	1	0	0	1	1	0	1	0	0	0	0	0	0	2013/12/31	5.1	9.3333	139.567	5.1	1	1	0	1	1	1	0	1
668	2000	1	4.9363	0	0	0	0	0	0	0	0	0	0	0	0	0	0	0	2013/12/31	108.233	108.233	108.233	108.233	0	0	0	0	0	0	0	0
669	1997	0	4.9363	0	0	0	0	0	0	0	0	0	1	0	0	0	1	1	2013/12/31	139.567	139.567	139.567	139.567	0	0	0	0	0	0	0	0
670	1999	1	4.9336	0	0	0	0	0	0	0	0	0	0	0	0	0	0	1	2013/12/31	118.5	118.5	118.5	118.5	0	0	0	0	0	0	0	0
671	1996	1	4.9336	0	0	0	0	0	0	0	0	0	0	0	0	0	0	0	2013/12/31	156.9	156.9	156.9	156.9	0	0	0	0	0	0	0	0
672	1996	1	4.9336	0	0	0	0	0	0	0	0	0	1	1	0	1	0	1	2013/12/31	156.933	156.933	156.933	156.933	0	0	0	0	0	0	0	0
673	2000	1	4.9281	0	0	1	0	0	1	1	0	1	0	0	0	0	0	1	2013/12/31	108.3	108.3	108.3	108.3	0	0	0	0	0	0	0	0
674	2003	1	4.9254	0	0	0	0	0	0	0	0	0	0	0	0	0	0	1	2013/12/31	73.6667	73.6667	73.6667	73.6667	0	0	0	0	0	0	0	0
675	2003	0	4.9254	0	0	0	0	0	0	0	0	0	0	0	0	0	0	0	2013/12/31	73.7667	73.7667	73.7667	73.7667	0	0	0	0	0	0	0	0
676	2002	1	4.9227	0	0	0	0	0	0	0	0	0	0	0	0	0	0	1	2013/12/31	1.0333	1.0333	79.9333	79.9333	1	1	0	0	1	1	0	0
677	2008	1	4.9227	1	0	0	0	0	0	0	0	0	0	0	0	0	0	1	2013/12/31	12.8667	12.8667	12.8667	12.8667	0	0	0	0	0	0	0	0
678	2008	0	4.9227	1	0	0	0	0	0	0	0	0	0	0	0	0	0	0	2013/12/31	12.9333	12.9333	12.9333	12.9333	0	0	0	0	0	0	0	0
679	2008	0	4.9227	0	0	0	0	0	0	0	0	0	0	0	0	0	0	0	2013/12/31	13.0667	13.0667	13.0667	13.0667	0	0	0	0	0	0	0	0
680	2005	0	4.9227	0	0	0	0	0	0	0	0	0	0	0	0	0	0	1	2013/12/31	46.4	46.4	46.4	46.4	0	0	0	0	0	0	0	0
681	2005	0	4.9227	0	0	0	0	0	0	0	0	0	0	0	0	0	0	0	2013/12/31	46.4667	46.4667	46.4667	46.4667	0	0	0	0	0	0	0	0
682	2004	0	4.9227	0	0	0	0	0	0	0	0	0	0	0	0	0	0	0	2013/12/31	58.5667	58.5667	58.5667	58.5667	0	0	0	0	0	0	0	0
683	2004	1	4.9227	0	0	0	0	0	1	1	0	0	0	0	0	0	0	1	2013/12/31	58.6	58.6	58.6	58.6	0	0	0	0	0	0	0	0
684	1999	0	4.9227	0	0	0	0	0	0	0	0	0	0	0	0	0	0	0	2013/12/31	119.467	119.467	119.467	119.467	0	0	0	0	0	0	0	0
685	1999	0	4.9227	0	0	0	0	0	0	0	0	0	0	0	0	0	0	1	2013/12/31	119.467	119.467	119.467	119.467	0	0	0	0	0	0	0	0
686	1999	1	4.9227	0	0	0	0	0	0	0	0	0	0	0	0	0	0	0	2013/12/31	119.5	119.5	119.5	119.5	0	0	0	0	0	0	0	0
687	2001	0	4.9199	1	0	0	0	0	1	1	0	0	0	0	0	0	0	1	2013/12/31	5.5667	92.1667	92.1667	5.5667	1	0	0	1	1	0	0	1
688	2004	1	4.9199	0	0	0	0	0	0	0	0	0	0	0	0	0	0	1	2013/12/31	50.3667	50.3667	50.3667	50.3667	0	0	0	0	0	0	0	0
689	2002	0	4.9199	0	0	0	0	0	0	0	0	0	0	0	0	0	0	0	2013/12/31	83.0333	83.0333	83.0333	83.0333	0	0	0	0	0	0	0	0
690	2002	1	4.9199	0	0	0	0	0	0	0	0	0	0	0	0	0	0	1	2013/12/31	83.0333	83.0333	83.0333	83.0333	0	0	0	0	0	0	0	0
691	2003	1	4.9172	1	0	1	0	0	1	1	0	0	1	0	0	0	1	0	2013/12/31	4.0333	4.0333	67.8667	67.8667	1	1	0	0	1	1	0	0
692	2003	1	4.9172	0	0	0	0	0	0	0	0	0	0	0	0	0	0	0	2013/12/31	10.7667	68	10.7667	68	1	0	1	0	1	0	1	0
693	2003	0	4.9172	0	0	0	0	0	0	0	0	0	0	0	0	0	0	1	2013/12/31	67.8667	67.8667	67.8667	67.8667	0	0	0	0	0	0	0	0
694	2002	1	4.9172	0	0	0	0	0	0	0	0	0	0	0	0	0	0	1	2013/12/31	84.1	84.1	84.1	84.1	0	0	0	0	0	0	0	0
695	2000	1	4.9117	0	0	0	0	0	1	1	0	0	1	1	1	0	0	1	2013/12/31	101.333	101.333	101.333	101.333	0	0	0	0	0	0	0	0
696	2000	0	4.9117	0	0	0	0	0	0	0	0	0	1	1	1	0	0	0	2013/12/31	101.367	101.367	101.367	101.367	0	0	0	0	0	0	0	0
697	1999	1	4.9117	0	0	0	0	0	0	0	0	0	0	0	0	0	0	1	2013/12/31	122.667	122.667	122.667	122.667	0	0	0	0	0	0	0	0
698	2005	0	4.909	0	0	0	0	0	0	0	0	0	0	0	0	0	0	0	2013/12/31	7.9333	7.9333	43.6333	43.6333	1	1	0	0	1	1	0	0
699	2005	1	4.909	0	0	0	0	0	1	0	0	1	0	0	0	0	0	1	2013/12/31	43.5333	43.5333	43.5333	43.5333	0	0	0	0	0	0	0	0
700	2002	0	4.9062	0	0	0	0	0	0	0	0	0	0	0	0	0	0	1	2013/12/31	78.0333	78.0333	78.0333	78.0333	0	0	0	0	0	0	0	0
701	2001	1	4.9062	0	0	0	0	0	0	0	0	0	0	0	0	0	0	1	2013/12/31	91.2667	91.2667	91.2667	91.2667	0	0	0	0	0	0	0	0
702	1996	0	4.9035	0	0	0	0	0	0	0	0	0	0	0	0	0	0	0	2013/12/31	8.4	154.3	154.3	8.4	1	0	0	1	1	0	0	1
703	2001	0	4.9035	0	0	0	0	0	0	0	0	0	0	0	0	0	0	1	2013/12/31	92.3333	92.3333	92.3333	92.3333	0	0	0	0	0	0	0	0
704	1999	1	4.9035	0	0	0	0	0	0	0	0	0	1	1	0	1	0	1	2013/12/31	113.567	113.567	113.567	113.567	0	0	0	0	0	0	0	0
705	1996	0	4.9035	0	0	0	0	0	0	0	0	0	0	0	0	0	0	1	2013/12/31	154.233	154.233	154.233	154.233	0	0	0	0	0	0	0	0
706	2006	1	4.9008	0	0	0	0	0	1	1	0	0	1	1	0	1	0	1	2013/12/31	28.4667	28.4667	28.4667	28.4667	0	0	0	0	0	0	0	0
707	2003	1	4.898	0	0	0	0	0	1	0	1	0	0	0	0	0	0	1	2013/12/31	70.9667	70.9667	70.9667	70.9667	0	0	0	0	0	0	0	0
708	2003	0	4.8898	0	0	0	0	0	0	0	0	0	1	1	0	1	0	1	2013/12/31	66.1	66.1	66.1	66.1	0	0	0	0	0	0	0	0
709	2000	1	4.8898	0	0	0	0	0	1	1	0	0	1	1	1	0	0	0	2013/12/31	104.7	104.7	104.7	104.7	0	0	0	0	0	0	0	0
710	2000	1	4.8898	0	0	0	0	0	0	0	0	0	0	0	0	0	0	1	2013/12/31	104.7	104.7	104.7	104.7	0	0	0	0	0	0	0	0
711	2000	1	4.8898	0	0	0	0	0	0	0	0	0	0	0	0	0	0	0	2013/12/31	104.8	104.8	104.8	104.8	0	0	0	0	0	0	0	0
712	1997	0	4.8843	0	0	0	0	0	0	0	0	0	1	1	1	0	0	1	2013/12/31	146.267	146.267	146.267	146.267	0	0	0	0	0	0	0	0
713	2001	0	4.8789	1	0	0	0	0	0	0	0	0	0	0	0	0	0	1	2013/12/31	90.5667	90.5667	90.5667	90.5667	0	0	0	0	0	0	0	0
714	2001	1	4.8789	1	0	0	0	0	1	1	0	0	1	1	1	0	0	0	2013/12/31	90.6333	90.6333	90.6333	90.6333	0	0	0	0	0	0	0	0
715	2000	0	4.8761	0	0	0	0	0	0	0	0	0	0	0	0	0	0	0	2005/05/30	5.3333	5.3333	5.3333	5.3333	0	0	0	0	0	0	0	0
716	2007	1	4.8761	0	0	0	0	0	0	0	0	0	0	0	0	0	0	1	2013/12/31	21.7333	21.7333	21.7333	21.7333	0	0	0	0	0	0	0	0
717	2007	1	4.8761	0	0	0	0	0	0	0	0	0	1	1	1	0	0	1	2013/12/31	22.7333	22.7333	22.7333	22.7333	0	0	0	0	0	0	0	0
718	2000	1	4.8761	0	0	0	0	0	0	0	0	0	1	0	0	0	1	1	2013/12/31	109.7	109.7	109.7	109.7	0	0	0	0	0	0	0	0
719	1997	0	4.8761	0	0	0	0	0	1	0	0	1	0	0	0	0	0	1	2013/12/31	141.267	141.267	141.267	141.267	0	0	0	0	0	0	0	0
720	1997	0	4.8761	0	0	0	0	0	0	0	0	0	0	0	0	0	0	0	2013/12/31	141.367	141.367	141.367	141.367	0	0	0	0	0	0	0	0
721	2004	0	4.8734	0	0	1	1	0	1	1	0	0	0	0	0	0	0	1	2013/12/31	55.1	55.1	55.1	55.1	0	0	0	0	0	0	0	0
722	2004	0	4.8734	0	0	1	1	0	1	1	0	1	1	1	1	0	0	0	2013/12/31	55.1333	55.1333	55.1333	55.1333	0	0	0	0	0	0	0	0
723	2007	1	4.8706	0	0	0	0	0	1	1	1	0	0	0	0	0	0	1	2013/12/31	20.7333	20.7333	20.7333	20.7333	0	0	0	0	0	0	0	0
724	2004	1	4.8706	0	0	0	0	0	0	0	0	0	0	0	0	0	0	1	2013/12/31	51.2333	51.2333	51.2333	51.2333	0	0	0	0	0	0	0	0
725	1996	0	4.8706	0	0	0	0	0	0	0	0	0	1	1	1	0	0	0	2013/12/31	149.533	149.533	149.533	149.533	0	0	0	0	0	0	0	0
726	2002	0	4.8652	0	0	0	0	0	0	0	0	0	0	0	0	0	0	1	2013/12/31	79.5	79.5	79.5	79.5	0	0	0	0	0	0	0	0
727	2002	0	4.8652	0	0	0	0	0	0	0	0	0	0	0	0	0	0	0	2013/12/31	79.7	79.7	79.7	79.7	0	0	0	0	0	0	0	0
728	2000	0	4.8624	0	0	0	0	0	0	0	0	0	0	0	0	0	0	1	2013/12/31	101.833	101.833	101.833	101.833	0	0	0	0	0	0	0	0
729	1998	0	4.8624	0	0	0	0	0	0	0	0	0	0	0	0	0	0	1	2013/12/31	127.267	127.267	127.267	127.267	0	0	0	0	0	0	0	0
730	1996	1	4.8624	0	0	0	0	0	0	0	0	0	0	0	0	0	0	1	2013/12/31	159.767	159.767	159.767	159.767	0	0	0	0	0	0	0	0
731	2001	0	4.8597	0	0	0	0	0	0	0	0	0	0	0	0	0	0	1	2013/12/31	88.7667	88.7667	88.7667	88.7667	0	0	0	0	0	0	0	0
732	2001	1	4.8597	0	0	0	0	0	0	0	0	0	0	0	0	0	0	0	2013/12/31	88.8333	88.8333	88.8333	88.8333	0	0	0	0	0	0	0	0
733	2001	0	4.8597	0	0	0	0	0	0	0	0	0	1	1	1	1	0	1	2013/12/31	89.6333	89.6333	89.6333	89.6333	0	0	0	0	0	0	0	0
734	2000	1	4.8597	0	0	0	0	0	0	0	0	0	0	0	0	0	0	1	2013/12/31	107.5	107.5	107.5	107.5	0	0	0	0	0	0	0	0
735	2000	1	4.8597	0	0	0	0	0	0	0	0	0	1	1	0	1	0	0	2013/12/31	108.233	108.233	108.233	108.233	0	0	0	0	0	0	0	0
736	1996	1	4.8487	0	0	0	0	0	0	0	0	0	0	0	0	0	0	0	2013/12/31	154.933	154.933	154.933	154.933	0	0	0	0	0	0	0	0
737	1996	0	4.8487	0	0	0	0	0	1	1	0	0	0	0	0	0	0	1	2013/12/31	154.933	154.933	154.933	154.933	0	0	0	0	0	0	0	0
738	2008	0	4.846	0	0	0	0	0	1	0	0	1	0	0	0	0	0	1	2013/12/31	13.8	13.8	13.8	13.8	0	0	0	0	0	0	0	0
739	2008	1	4.846	0	0	0	0	0	0	0	0	0	0	0	0	0	0	0	2013/12/31	13.9667	13.9667	13.9667	13.9667	0	0	0	0	0	0	0	0
740	2003	0	4.846	0	0	0	0	0	0	0	0	0	0	0	0	0	0	0	2013/12/31	74.6667	74.6667	74.6667	74.6667	0	0	0	0	0	0	0	0
741	2003	1	4.846	1	0	1	0	0	1	1	0	0	0	0	0	0	0	0	2013/12/31	74.7667	74.7667	74.7667	74.7667	0	0	0	0	0	0	0	0
742	2003	0	4.846	0	0	0	0	0	0	0	0	0	0	0	0	0	0	1	2013/12/31	74.8	74.8	74.8	74.8	0	0	0	0	0	0	0	0
743	2004	0	4.8433	0	0	0	0	0	0	0	0	0	1	1	1	0	0	1	2013/12/31	54.4667	54.4667	54.4667	54.4667	0	0	0	0	0	0	0	0
744	1996	1	4.8405	0	0	0	0	0	0	0	0	0	0	0	0	0	0	0	2013/12/31	155.733	155.733	155.733	155.733	0	0	0	0	0	0	0	0
745	1996	1	4.8405	0	0	0	0	0	0	0	0	0	0	0	0	0	0	1	2013/12/31	156	156	156	156	0	0	0	0	0	0	0	0
746	2000	1	4.8378	0	0	0	0	0	0	0	0	0	0	0	0	0	0	0	2013/12/31	1.2	1.2	100.267	100.267	1	1	0	0	1	1	0	0
747	2000	1	4.8378	0	0	0	0	0	0	0	0	0	1	1	1	0	0	1	2013/12/31	100	100	100	100	0	0	0	0	0	0	0	0
748	1998	1	4.8378	0	0	0	0	0	0	0	0	0	0	0	0	0	0	1	2013/12/31	125.633	125.633	125.633	125.633	0	0	0	0	0	0	0	0
749	2006	1	4.835	0	0	0	0	0	0	0	0	0	0	0	0	0	0	1	2013/12/31	38.3333	38.3333	38.3333	38.3333	0	0	0	0	0	0	0	0
750	1999	1	4.8323	0	0	0	0	0	0	0	0	0	1	1	1	0	0	0	2013/12/31	117.533	117.533	117.533	117.533	0	0	0	0	0	0	0	0
751	1999	1	4.8323	0	0	0	0	0	0	0	0	0	0	0	0	0	0	1	2013/12/31	117.6	117.6	117.6	117.6	0	0	0	0	0	0	0	0
752	1999	1	4.8323	0	0	0	0	0	0	0	0	0	0	0	0	0	0	0	2013/12/31	117.633	117.633	117.633	117.633	0	0	0	0	0	0	0	0
753	2004	1	4.8268	0	0	0	0	0	0	0	0	0	0	0	0	0	0	1	2013/12/31	57.6333	57.6333	57.6333	57.6333	0	0	0	0	0	0	0	0
754	1996	1	4.8268	0	0	0	0	0	1	1	0	0	1	1	1	1	1	1	2013/12/31	154.133	154.133	154.133	154.133	0	0	0	0	0	0	0	0
755	2005	0	4.8241	0	0	0	0	0	0	0	0	0	0	0	0	0	0	1	2013/12/31	40.3333	40.3333	40.3333	40.3333	0	0	0	0	0	0	0	0
756	2005	0	4.8241	0	0	0	0	0	0	0	0	0	0	0	0	0	0	0	2013/12/31	40.5333	40.5333	40.5333	40.5333	0	0	0	0	0	0	0	0
757	2005	1	4.8241	0	0	0	0	0	0	0	0	0	0	0	0	0	0	0	2013/12/31	40.5667	40.5667	40.5667	40.5667	0	0	0	0	0	0	0	0
758	1997	1	4.8241	0	0	0	0	0	0	0	0	0	0	0	0	0	0	1	2013/12/31	145.033	145.033	145.033	145.033	0	0	0	0	0	0	0	0
759	1997	0	4.8241	0	0	0	0	0	0	0	0	0	0	0	0	0	0	0	2013/12/31	145.1	145.1	145.1	145.1	0	0	0	0	0	0	0	0
760	1998	1	4.8214	0	0	0	0	0	0	0	0	0	0	0	0	0	0	1	2013/12/31	130.8	130.8	130.8	130.8	0	0	0	0	0	0	0	0
761	1998	1	4.8214	0	0	0	0	0	0	0	0	0	1	1	1	0	0	0	2013/12/31	130.9	130.9	130.9	130.9	0	0	0	0	0	0	0	0
762	2006	1	4.8186	0	0	0	0	0	1	0	1	1	1	1	1	0	0	1	2013/12/31	35.6	35.6	35.6	35.6	0	0	0	0	0	0	0	0
763	2003	1	4.8186	0	0	0	0	0	1	1	0	0	0	0	0	0	0	1	2013/12/31	71.9667	71.9667	71.9667	71.9667	0	0	0	0	0	0	0	0
764	2003	1	4.8186	0	0	0	0	0	1	0	0	1	1	0	0	0	1	0	2013/12/31	72	72	72	72	0	0	0	0	0	0	0	0
765	2001	1	4.8186	0	0	1	0	0	1	1	1	0	0	0	0	0	0	1	2013/12/31	93.1333	93.1333	93.1333	93.1333	0	0	0	0	0	0	0	0
766	2001	0	4.8186	0	0	0	0	0	1	1	1	0	0	0	0	0	0	0	2013/12/31	93.3667	93.3667	93.3667	93.3667	0	0	0	0	0	0	0	0
767	2001	1	4.8186	0	0	0	0	0	1	0	0	1	0	0	0	0	0	0	2013/12/31	93.4667	93.4667	93.4667	93.4667	0	0	0	0	0	0	0	0
768	2000	0	4.8186	0	0	0	0	0	0	0	0	0	0	0	0	0	0	1	2013/12/31	110.567	110.567	110.567	110.567	0	0	0	0	0	0	0	0
769	1996	1	4.8159	0	0	0	0	0	0	0	0	0	0	0	0	0	0	1	2013/12/31	159.267	159.267	159.267	159.267	0	0	0	0	0	0	0	0
770	1996	0	4.8131	0	0	0	0	0	0	0	0	0	0	0	0	0	0	0	2013/12/31	153.267	153.267	153.267	153.267	0	0	0	0	0	0	0	0
771	1996	1	4.8131	0	0	0	0	0	0	0	0	0	0	0	0	0	0	1	2013/12/31	153.3	153.3	153.3	153.3	0	0	0	0	0	0	0	0
772	1996	1	4.8131	0	0	0	0	0	0	0	0	0	0	0	0	0	0	1	2013/12/31	158.367	158.367	158.367	158.367	0	0	0	0	0	0	0	0
773	1996	0	4.8104	0	0	0	0	0	0	0	0	0	1	1	1	1	0	0	2013/12/31	1.1333	1.1333	151.3	151.3	1	1	0	0	1	1	0	0
774	1996	0	4.8104	0	0	0	0	0	0	0	0	0	0	0	0	0	0	0	2013/12/31	8.6667	8.6667	151.3	151.3	1	1	0	0	1	1	0	0
775	1996	0	4.8104	0	0	0	0	0	0	0	0	0	1	1	0	1	1	1	2013/12/31	151.333	151.333	151.333	151.333	0	0	0	0	0	0	0	0
776	2001	0	4.8077	0	0	0	0	0	0	0	0	0	0	0	0	0	0	1	2013/12/31	96.5667	96.5667	96.5667	96.5667	0	0	0	0	0	0	0	0
777	1998	1	4.8049	0	0	0	0	0	0	0	0	0	0	0	0	0	0	1	2013/12/31	125.867	125.867	125.867	125.867	0	0	0	0	0	0	0	0
778	2005	1	4.8022	0	0	0	0	0	0	0	0	0	0	0	0	0	0	0	2013/12/31	40.7333	40.7333	40.7333	40.7333	0	0	0	0	0	0	0	0
779	2005	1	4.8022	0	0	0	0	0	0	0	0	0	0	0	0	0	0	0	2013/12/31	40.9	40.9	40.9	40.9	0	0	0	0	0	0	0	0
780	1999	1	4.8022	0	0	0	0	0	0	0	0	0	1	1	1	0	0	1	2013/12/31	117.833	117.833	117.833	117.833	0	0	0	0	0	0	0	0
781	1999	1	4.8022	0	0	0	0	0	0	0	0	0	1	0	0	0	1	0	2013/12/31	118.033	118.033	118.033	118.033	0	0	0	0	0	0	0	0
782	1998	1	4.7995	0	0	0	0	0	0	0	0	0	0	0	0	0	0	0	2013/12/31	7.3667	7.3667	132.267	132.267	1	1	0	0	1	1	0	0
783	2007	1	4.7995	0	0	0	0	0	0	0	0	0	1	1	1	0	0	1	2013/12/31	19.4	19.4	19.4	19.4	0	0	0	0	0	0	0	0
784	2000	0	4.7995	0	0	0	0	0	0	0	0	0	1	1	1	0	0	1	2013/12/31	110.733	110.733	110.733	110.733	0	0	0	0	0	0	0	0
785	1998	1	4.7995	0	0	0	0	0	1	1	0	0	0	0	0	0	0	1	2013/12/31	132.1	132.1	132.1	132.1	0	0	0	0	0	0	0	0
786	2004	0	4.7967	0	0	0	0	0	0	0	0	0	0	0	0	0	0	1	2013/12/31	60.9333	60.9333	60.9333	60.9333	0	0	0	0	0	0	0	0
787	2000	1	4.7967	0	0	1	0	0	1	1	1	0	1	1	1	0	0	0	2013/12/31	104.733	104.733	104.733	104.733	0	0	0	0	0	0	0	0
788	2000	1	4.7967	0	0	0	0	0	0	0	0	0	0	0	0	0	0	1	2013/12/31	104.833	104.833	104.833	104.833	0	0	0	0	0	0	0	0
789	2000	0	4.794	0	0	0	0	0	0	0	0	0	0	0	0	0	0	1	2013/12/31	106.9	106.9	106.9	106.9	0	0	0	0	0	0	0	0
790	1996	1	4.794	0	0	0	0	0	0	0	0	0	0	0	0	0	0	1	2013/12/31	154.6	154.6	154.6	154.6	0	0	0	0	0	0	0	0
791	1997	1	4.7885	0	0	0	0	0	1	1	0	0	1	1	1	0	0	0	2013/12/31	146.533	146.533	146.533	146.533	0	0	0	0	0	0	0	0
792	1997	0	4.7885	0	0	0	0	0	1	0	0	1	0	0	0	0	0	0	2013/12/31	146.533	146.533	146.533	146.533	0	0	0	0	0	0	0	0
793	2003	1	4.7858	0	0	0	0	0	0	0	0	0	1	1	1	0	0	1	2013/12/31	70.4667	70.4667	70.4667	70.4667	0	0	0	0	0	0	0	0
794	1996	1	4.7858	0	0	0	0	0	0	0	0	0	1	1	0	1	0	1	2013/12/31	149.433	149.433	149.433	149.433	0	0	0	0	0	0	0	0
795	1996	1	4.7858	0	0	0	0	0	0	0	0	0	0	0	0	0	0	0	2013/12/31	149.6	149.6	149.6	149.6	0	0	0	0	0	0	0	0
796	2006	1	4.783	0	0	1	0	0	1	1	1	1	1	1	1	0	0	0	2013/12/31	5.0667	5.0667	39	39	1	1	0	0	1	1	0	0
797	2001	1	4.783	0	0	1	0	0	1	1	1	0	1	1	1	0	0	0	2013/12/31	10.7667	10.7667	10.7667	94.8	1	1	1	0	1	1	1	0
798	2006	1	4.783	0	0	0	0	0	0	0	0	0	0	0	0	0	0	1	2013/12/31	38.9333	38.9333	38.9333	38.9333	0	0	0	0	0	0	0	0
799	2001	1	4.783	1	0	0	0	0	0	0	0	0	0	0	0	0	0	1	2013/12/31	94.6333	94.6333	94.6333	94.6333	0	0	0	0	0	0	0	0
800	2001	1	4.783	0	0	0	0	0	1	1	0	0	1	1	1	0	0	0	2013/12/31	94.8667	94.8667	94.8667	94.8667	0	0	0	0	0	0	0	0
801	1996	1	4.783	0	0	0	0	0	1	0	0	1	0	0	0	0	0	1	2013/12/31	151.533	151.533	151.533	151.533	0	0	0	0	0	0	0	0
802	2002	1	4.7803	0	0	0	0	0	1	1	1	0	1	0	0	0	1	1	2013/12/31	87.7333	87.7333	87.7333	87.7333	0	0	0	0	0	0	0	0
803	2002	1	4.7803	0	0	0	0	0	0	0	0	0	0	0	0	0	0	0	2013/12/31	87.8	87.8	87.8	87.8	0	0	0	0	0	0	0	0
804	1997	0	4.7803	0	0	0	0	0	0	0	0	0	0	0	0	0	0	1	2013/12/31	145.5	145.5	145.5	145.5	0	0	0	0	0	0	0	0
805	1997	1	4.7803	0	0	0	0	0	0	0	0	0	1	0	0	0	1	0	2013/12/31	145.633	145.633	145.633	145.633	0	0	0	0	0	0	0	0
806	1997	1	4.7803	0	0	0	0	0	0	0	0	0	0	0	0	0	0	0	2013/12/31	145.667	145.667	145.667	145.667	0	0	0	0	0	0	0	0
807	2005	1	4.7775	0	0	0	0	0	0	0	0	0	0	0	0	0	0	1	2013/12/31	46.2333	46.2333	46.2333	46.2333	0	0	0	0	0	0	0	0
808	2005	0	4.7775	0	0	0	0	0	1	0	0	1	0	0	0	0	0	1	2013/12/31	48	48	48	48	0	0	0	0	0	0	0	0
809	2005	0	4.7775	0	0	0	0	0	1	1	0	0	1	1	1	1	0	0	2013/12/31	48.1667	48.1667	48.1667	48.1667	0	0	0	0	0	0	0	0
810	1998	1	4.7775	0	0	0	0	0	0	0	0	0	0	0	0	0	0	0	2013/12/31	130.467	130.467	130.467	130.467	0	0	0	0	0	0	0	0
811	1998	0	4.7775	0	0	0	0	0	1	1	1	1	1	1	0	1	1	1	2013/12/31	130.467	130.467	130.467	130.467	0	0	0	0	0	0	0	0
812	2001	1	4.7748	0	0	0	0	0	0	0	0	0	0	0	0	0	0	0	2013/12/31	99.7333	99.7333	99.7333	99.7333	0	0	0	0	0	0	0	0
813	2001	1	4.7748	0	0	0	0	0	0	0	0	0	1	1	1	1	0	1	2013/12/31	100	100	100	100	0	0	0	0	0	0	0	0
814	2003	1	4.7721	0	0	0	0	0	1	1	0	0	1	1	1	0	0	1	2013/12/31	5.2333	5.2333	67.3667	67.3667	1	1	0	0	1	1	0	0
815	2003	1	4.7721	0	0	0	0	0	1	1	0	0	0	0	0	0	0	0	2013/12/31	67.6	67.6	67.6	67.6	0	0	0	0	0	0	0	0
816	2003	1	4.7721	0	0	0	0	0	0	0	0	0	0	0	0	0	0	0	2013/12/31	67.6667	67.6667	67.6667	67.6667	0	0	0	0	0	0	0	0
817	2007	1	4.7693	0	0	0	0	0	1	1	0	1	0	0	0	0	0	0	2013/12/31	16.9	16.9	16.9	16.9	0	0	0	0	0	0	0	0
818	2007	1	4.7693	0	0	0	0	0	0	0	0	0	0	0	0	0	0	1	2013/12/31	16.9333	16.9333	16.9333	16.9333	0	0	0	0	0	0	0	0
819	2005	1	4.7693	0	0	1	0	0	1	1	0	0	1	0	0	0	1	0	2013/12/31	40.2667	40.2667	40.2667	40.2667	0	0	0	0	0	0	0	0
820	2002	0	4.7693	0	0	0	0	0	0	0	0	0	0	0	0	0	0	0	2013/12/31	83.8667	83.8667	83.8667	83.8667	0	0	0	0	0	0	0	0
821	2002	1	4.7693	0	0	0	0	0	0	0	0	0	0	0	0	0	0	1	2013/12/31	83.9333	83.9333	83.9333	83.9333	0	0	0	0	0	0	0	0
822	1999	1	4.7666	0	0	0	0	0	1	1	0	1	0	0	0	0	0	0	2013/12/31	3.5333	3.5333	3.5333	113.267	1	1	1	0	1	1	1	0
823	1999	1	4.7666	0	0	0	0	0	1	1	0	1	0	0	0	0	0	0	2013/12/31	113.267	113.267	113.267	113.267	0	0	0	0	0	0	0	0
824	1997	1	4.7666	0	0	0	0	0	0	0	0	0	0	0	0	0	0	1	2013/12/31	146.733	146.733	146.733	146.733	0	0	0	0	0	0	0	0
825	1997	0	4.7666	0	0	0	0	0	0	0	0	0	0	0	0	0	0	0	2013/12/31	146.9	146.9	146.9	146.9	0	0	0	0	0	0	0	0
826	2000	1	4.7639	0	0	0	0	0	0	0	0	0	0	0	0	0	0	0	2013/12/31	7.4333	106.267	7.4333	106.267	1	0	1	0	1	0	1	0
827	2000	1	4.7639	0	0	0	0	0	0	0	0	0	0	0	0	0	0	1	2013/12/31	102	102	102	102	0	0	0	0	0	0	0	0
828	2000	0	4.7639	0	0	0	0	0	0	0	0	0	1	1	1	0	0	1	2013/12/31	105.9	105.9	105.9	105.9	0	0	0	0	0	0	0	0
829	2000	0	4.7639	0	0	0	0	0	1	0	0	1	1	1	0	1	0	0	2013/12/31	106.3	106.3	106.3	106.3	0	0	0	0	0	0	0	0
830	2004	1	4.7611	0	0	0	0	0	1	0	0	1	1	1	0	1	0	1	2013/12/31	60.4667	60.4667	60.4667	60.4667	0	0	0	0	0	0	0	0
831	2004	0	4.7611	0	0	0	0	0	0	0	0	0	0	0	0	0	0	0	2013/12/31	60.5	60.5	60.5	60.5	0	0	0	0	0	0	0	0
832	2004	0	4.7611	0	0	0	0	0	0	0	0	0	1	1	1	0	0	0	2013/12/31	60.5333	60.5333	60.5333	60.5333	0	0	0	0	0	0	0	0
833	2004	0	4.7611	0	0	0	0	0	0	0	0	0	0	0	0	0	0	0	2013/12/31	60.6	60.6	60.6	60.6	0	0	0	0	0	0	0	0
834	1997	0	4.7611	0	0	0	0	0	0	0	0	0	0	0	0	0	0	1	2013/12/31	145.733	145.733	145.733	145.733	0	0	0	0	0	0	0	0
835	2003	1	4.7584	0	0	0	0	0	0	0	0	0	0	0	0	0	0	1	2013/12/31	74.6667	74.6667	74.6667	74.6667	0	0	0	0	0	0	0	0
836	2003	0	4.7584	0	0	0	0	0	0	0	0	0	0	0	0	0	0	0	2013/12/31	74.8	74.8	74.8	74.8	0	0	0	0	0	0	0	0
837	1998	1	4.7584	0	0	0	1	0	0	0	0	0	0	0	0	0	0	1	2013/12/31	133.6	133.6	133.6	133.6	0	0	0	0	0	0	0	0
838	1998	0	4.7584	0	0	0	0	0	1	0	0	1	0	0	0	0	0	0	2013/12/31	133.8	133.8	133.8	133.8	0	0	0	0	0	0	0	0
839	1998	1	4.7584	0	0	0	0	0	0	0	0	0	0	0	0	0	0	0	2013/12/31	133.8	133.8	133.8	133.8	0	0	0	0	0	0	0	0
840	1996	1	4.7556	0	0	0	0	0	0	0	0	0	0	0	0	0	0	1	2013/12/31	149.9	149.9	149.9	149.9	0	0	0	0	0	0	0	0
841	2006	0	4.7529	0	0	0	0	0	0	0	0	0	0	0	0	0	0	0	2013/12/31	32.2667	32.2667	32.2667	32.2667	0	0	0	0	0	0	0	0
842	2006	1	4.7529	0	0	0	0	0	0	0	0	0	0	0	0	0	0	1	2013/12/31	32.2667	32.2667	32.2667	32.2667	0	0	0	0	0	0	0	0
843	2006	1	4.7529	0	0	0	0	0	0	0	0	0	0	0	0	0	0	0	2013/12/31	32.3	32.3	32.3	32.3	0	0	0	0	0	0	0	0
844	2006	1	4.7529	0	0	1	0	0	1	1	0	0	1	1	1	0	0	1	2013/12/31	33.2667	33.2667	33.2667	33.2667	0	0	0	0	0	0	0	0
845	2004	1	4.7529	0	0	1	0	0	1	0	1	1	1	1	0	1	0	1	2013/12/31	61.7	61.7	61.7	61.7	0	0	0	0	0	0	0	0
846	2004	1	4.7529	0	0	0	1	0	1	1	0	0	0	0	0	0	0	0	2013/12/31	61.7333	61.7333	61.7333	61.7333	0	0	0	0	0	0	0	0
847	1999	1	4.7529	0	0	1	0	0	1	1	0	1	0	0	0	0	0	1	2013/12/31	117.333	117.333	117.333	117.333	0	0	0	0	0	0	0	0
848	1999	0	4.7529	0	0	1	0	0	1	1	0	0	0	0	0	0	0	0	2013/12/31	117.533	117.533	117.533	117.533	0	0	0	0	0	0	0	0
849	1999	1	4.7529	0	0	0	0	0	0	0	0	0	0	0	0	0	0	0	2013/12/31	117.6	117.6	117.6	117.6	0	0	0	0	0	0	0	0
850	1999	1	4.7529	0	0	0	0	0	0	0	0	0	0	0	0	0	0	1	2013/12/31	122.633	122.633	122.633	122.633	0	0	0	0	0	0	0	0
851	2005	1	4.7502	0	0	0	0	0	0	0	0	0	0	0	0	0	0	1	2013/12/31	50.1	50.1	50.1	50.1	0	0	0	0	0	0	0	0
852	1997	0	4.7502	0	0	0	0	0	0	0	0	0	0	0	0	0	0	1	2013/12/31	145.967	145.967	145.967	145.967	0	0	0	0	0	0	0	0
853	2002	1	4.7474	0	0	0	0	0	0	0	0	0	0	0	0	0	0	1	2013/12/31	79.1333	79.1333	79.1333	79.1333	0	0	0	0	0	0	0	0
854	2001	1	4.7474	0	0	0	0	0	0	0	0	0	0	0	0	0	0	1	2013/12/31	93.2667	93.2667	93.2667	93.2667	0	0	0	0	0	0	0	0
855	2001	0	4.7474	0	0	0	0	0	0	0	0	0	1	1	1	0	0	0	2013/12/31	95.3	95.3	95.3	95.3	0	0	0	0	0	0	0	0
856	2001	1	4.7474	0	0	0	0	0	0	0	0	0	1	0	0	0	1	0	2013/12/31	95.3	95.3	95.3	95.3	0	0	0	0	0	0	0	0
857	2001	1	4.7474	0	0	0	0	0	0	0	0	0	0	0	0	0	0	1	2013/12/31	95.3	95.3	95.3	95.3	0	0	0	0	0	0	0	0
858	1996	0	4.7447	0	0	0	0	0	1	1	0	0	0	0	0	0	0	0	2013/12/31	4.0667	4.0667	4.0667	153.1	1	1	1	0	1	1	1	0
859	1999	1	4.7447	0	0	0	0	0	0	0	0	0	0	0	0	0	0	1	2013/12/31	123.567	123.567	123.567	123.567	0	0	0	0	0	0	0	0
860	1996	1	4.7447	0	0	0	0	0	0	0	0	0	0	0	0	0	0	0	2013/12/31	153	153	153	153	0	0	0	0	0	0	0	0
861	1996	0	4.7447	0	0	0	0	0	0	0	0	0	0	0	0	0	0	1	2013/12/31	153	153	153	153	0	0	0	0	0	0	0	0
862	1996	1	4.7447	0	0	0	0	0	1	0	1	0	1	1	1	0	0	0	2013/12/31	153.067	153.067	153.067	153.067	0	0	0	0	0	0	0	0
863	1996	1	4.7447	0	0	0	0	0	0	0	0	0	0	0	0	0	0	0	2013/12/31	153.2	153.2	153.2	153.2	0	0	0	0	0	0	0	0
864	1998	0	4.742	0	0	0	0	0	0	0	0	0	0	0	0	0	0	0	2013/12/31	125.767	125.767	125.767	125.767	0	0	0	0	0	0	0	0
865	1998	1	4.742	0	0	0	0	0	0	0	0	0	0	0	0	0	0	1	2013/12/31	125.833	125.833	125.833	125.833	0	0	0	0	0	0	0	0
866	2007	1	4.7392	0	0	0	0	0	0	0	0	0	1	0	0	0	1	0	2013/12/31	18.2667	18.2667	18.2667	18.2667	0	0	0	0	0	0	0	0
867	2007	1	4.7392	0	0	0	0	0	0	0	0	0	0	0	0	0	0	1	2013/12/31	18.3333	18.3333	18.3333	18.3333	0	0	0	0	0	0	0	0
868	2000	0	4.7392	0	0	0	0	0	0	0	0	0	1	1	1	0	0	0	2013/12/31	109.533	109.533	109.533	109.533	0	0	0	0	0	0	0	0
869	2000	0	4.7392	0	0	0	0	0	0	0	0	0	1	1	1	0	0	1	2013/12/31	109.533	109.533	109.533	109.533	0	0	0	0	0	0	0	0
870	2000	1	4.7392	0	0	0	0	0	0	0	0	0	0	0	0	0	0	0	2013/12/31	109.567	109.567	109.567	109.567	0	0	0	0	0	0	0	0
871	2000	1	4.7392	0	0	0	0	0	0	0	0	0	0	0	0	0	0	0	2013/12/31	109.6	109.6	109.6	109.6	0	0	0	0	0	0	0	0
872	1998	0	4.7337	0	0	0	0	0	1	0	0	1	0	0	0	0	0	1	2013/12/31	0.3	0.3	125.9	125.9	0	0	0	0	0	0	0	0
873	2000	0	4.731	0	0	0	0	0	1	1	1	0	1	1	1	0	0	1	2013/12/31	110.667	110.667	110.667	110.667	0	0	0	0	0	0	0	0
874	2000	0	4.731	0	0	0	0	0	0	0	0	0	0	0	0	0	0	0	2013/12/31	110.767	110.767	110.767	110.767	0	0	0	0	0	0	0	0
875	2008	0	4.7283	0	0	0	0	0	0	0	0	0	0	0	0	0	0	1	2013/12/31	12.3	12.3	12.3	12.3	0	0	0	0	0	0	0	0
876	2000	1	4.7255	0	0	0	0	0	1	0	0	1	0	0	0	0	0	1	2013/12/31	104.5	104.5	104.5	104.5	0	0	0	0	0	0	0	0
877	2000	1	4.7255	0	0	0	0	0	0	0	0	0	0	0	0	0	0	0	2013/12/31	104.533	104.533	104.533	104.533	0	0	0	0	0	0	0	0
878	2000	1	4.7255	0	0	0	0	0	0	0	0	0	0	0	0	0	0	0	2013/12/31	104.667	104.667	104.667	104.667	0	0	0	0	0	0	0	0
879	2000	1	4.7255	0	0	0	0	0	0	0	0	0	0	0	0	0	0	0	2013/12/31	104.667	104.667	104.667	104.667	0	0	0	0	0	0	0	0
880	1997	1	4.7255	0	0	0	0	0	0	0	0	0	1	0	0	0	1	1	2013/12/31	138.1	138.1	138.1	138.1	0	0	0	0	0	0	0	0
881	2005	1	4.7201	0	0	0	0	0	1	0	0	1	0	0	0	0	0	1	2013/12/31	8	42.9333	42.9333	8	1	0	0	1	1	0	0	1
882	2005	1	4.7201	0	0	1	0	0	1	1	1	1	1	1	1	0	0	0	2013/12/31	42.9333	42.9333	42.9333	42.9333	0	0	0	0	0	0	0	0
883	1998	0	4.7146	0	0	0	0	0	0	0	0	0	0	0	0	0	0	1	2013/12/31	137.167	137.167	137.167	137.167	0	0	0	0	0	0	0	0
884	1998	0	4.7146	0	0	0	0	0	0	0	0	0	0	0	0	0	0	0	2013/12/31	137.233	137.233	137.233	137.233	0	0	0	0	0	0	0	0
885	2003	0	4.7118	0	0	0	0	0	0	0	0	0	0	0	0	0	0	0	2008/03/19	0	0	0	0	0	0	0	0	0	0	0	0
886	2001	1	4.7118	0	0	0	0	0	1	1	0	0	0	0	0	0	0	0	2013/12/31	2.5333	2.5333	98.7667	98.7667	1	1	0	0	1	1	0	0
887	2003	1	4.7118	0	0	0	0	0	0	0	0	0	0	0	0	0	0	1	2013/12/31	70.1333	70.1333	70.1333	70.1333	0	0	0	0	0	0	0	0
888	2003	1	4.7118	0	0	0	0	0	0	0	0	0	0	0	0	0	0	1	2013/12/31	70.2667	70.2667	70.2667	70.2667	0	0	0	0	0	0	0	0
889	2003	1	4.7118	0	0	0	0	0	1	1	0	0	0	0	0	0	0	0	2013/12/31	70.4	70.4	70.4	70.4	0	0	0	0	0	0	0	0
890	2003	0	4.7118	0	0	0	0	0	0	0	0	0	0	0	0	0	0	0	2013/12/31	70.4333	70.4333	70.4333	70.4333	0	0	0	0	0	0	0	0
891	2001	1	4.7118	0	0	0	0	0	0	0	0	0	0	0	0	0	0	1	2013/12/31	98.8333	98.8333	98.8333	98.8333	0	0	0	0	0	0	0	0
892	1996	1	4.7118	0	0	0	0	0	1	1	0	0	0	0	0	0	0	1	2013/12/31	150.467	150.467	150.467	150.467	0	0	0	0	0	0	0	0
893	1998	0	4.7091	0	0	0	0	0	0	0	0	0	0	0	0	0	0	1	2013/12/31	125.767	125.767	125.767	125.767	0	0	0	0	0	0	0	0
894	2003	1	4.7064	0	0	0	0	0	0	0	0	0	0	0	0	0	0	1	2013/12/31	70.3667	70.3667	70.3667	70.3667	0	0	0	0	0	0	0	0
895	2000	1	4.7064	0	0	1	0	0	1	1	0	1	1	0	0	0	1	1	2013/12/31	105.633	105.633	105.633	105.633	0	0	0	0	0	0	0	0
896	2000	1	4.7064	0	0	0	0	0	0	0	0	0	0	0	0	0	0	0	2013/12/31	106	106	106	106	0	0	0	0	0	0	0	0
897	1998	0	4.7064	0	0	0	0	0	0	0	0	0	0	0	0	0	0	1	2013/12/31	137.333	137.333	137.333	137.333	0	0	0	0	0	0	0	0
898	1999	1	4.7036	0	0	0	0	0	1	0	1	0	1	1	0	1	0	1	2013/12/31	123.067	123.067	123.067	123.067	0	0	0	0	0	0	0	0
899	1999	1	4.7036	0	0	0	0	0	0	0	0	0	0	0	0	0	0	0	2013/12/31	123.333	123.333	123.333	123.333	0	0	0	0	0	0	0	0
900	1998	1	4.7036	0	0	0	0	0	1	0	0	1	1	0	0	0	1	0	2013/12/31	137.4	137.4	137.4	137.4	0	0	0	0	0	0	0	0
901	1998	1	4.7036	0	0	0	0	0	0	0	0	0	0	0	0	0	0	0	2013/12/31	137.433	137.433	137.433	137.433	0	0	0	0	0	0	0	0
902	1998	1	4.7036	0	0	0	0	0	0	0	0	0	0	0	0	0	0	1	2013/12/31	137.433	137.433	137.433	137.433	0	0	0	0	0	0	0	0
903	2004	0	4.6982	0	0	0	0	0	1	1	0	0	0	0	0	0	0	1	2013/12/31	10.4333	10.4333	53.1	53.1	1	1	0	0	1	1	0	0
904	2007	0	4.6982	0	0	0	0	0	0	0	0	0	1	1	1	0	0	1	2013/12/31	19.2667	19.2667	19.2667	19.2667	0	0	0	0	0	0	0	0
905	2004	1	4.6982	0	0	0	0	0	0	0	0	0	0	0	0	0	0	0	2013/12/31	53.2	53.2	53.2	53.2	0	0	0	0	0	0	0	0
906	2001	0	4.6982	0	0	0	0	0	0	0	0	0	0	0	0	0	0	1	2013/12/31	92.6333	92.6333	92.6333	92.6333	0	0	0	0	0	0	0	0
907	2007	0	4.6927	0	0	0	0	0	0	0	0	0	0	0	0	0	0	0	2013/12/31	7.2333	7.2333	23.9667	23.9667	1	1	0	0	1	1	0	0
908	2007	1	4.6927	0	0	0	0	0	1	0	0	1	0	0	0	0	0	1	2013/12/31	23.9667	23.9667	23.9667	23.9667	0	0	0	0	0	0	0	0
909	2001	0	4.6927	0	0	0	0	0	0	0	0	0	1	1	1	0	0	1	2013/12/31	95.8333	95.8333	95.8333	95.8333	0	0	0	0	0	0	0	0
910	2001	0	4.6927	0	0	0	0	0	0	0	0	0	0	0	0	0	0	0	2013/12/31	96	96	96	96	0	0	0	0	0	0	0	0
911	2000	0	4.6927	0	0	0	0	0	0	0	0	0	1	1	1	0	0	1	2013/12/31	109.133	109.133	109.133	109.133	0	0	0	0	0	0	0	0
912	2000	1	4.6899	0	0	0	0	0	0	0	0	0	1	0	0	0	1	1	2013/12/31	2.7	2.7	111.967	11.7333	1	1	0	1	1	1	0	1
913	2000	1	4.6899	0	0	0	0	0	0	0	0	0	0	0	0	0	0	0	2013/12/31	10.5667	10.5667	104.067	104.067	1	1	0	0	1	1	0	0
914	2006	1	4.6899	0	0	0	0	0	0	0	0	0	1	1	1	0	0	0	2013/12/31	31.0333	31.0333	31.0333	31.0333	0	0	0	0	0	0	0	0
915	2000	0	4.6899	0	0	0	0	0	1	0	0	1	1	1	1	0	0	0	2013/12/31	103.933	103.933	103.933	103.933	0	0	0	0	0	0	0	0
916	2000	1	4.6899	0	0	0	0	0	1	0	0	1	0	0	0	0	0	1	2013/12/31	103.967	103.967	103.967	103.967	0	0	0	0	0	0	0	0
917	2000	0	4.6899	0	0	0	0	0	0	0	0	0	0	0	0	0	0	0	2013/12/31	112.2	112.2	112.2	112.2	0	0	0	0	0	0	0	0
918	2003	1	4.6872	0	0	0	0	0	0	0	0	0	0	0	0	0	0	1	2013/12/31	73.6333	73.6333	73.6333	73.6333	0	0	0	0	0	0	0	0
919	2002	0	4.6872	0	0	0	0	0	0	0	0	0	1	1	1	0	0	0	2013/12/31	78.7667	78.7667	78.7667	78.7667	0	0	0	0	0	0	0	0
920	2002	0	4.6872	0	0	0	0	0	0	0	0	0	0	0	0	0	0	1	2013/12/31	78.8333	78.8333	78.8333	78.8333	0	0	0	0	0	0	0	0
921	1998	1	4.6845	0	0	0	0	0	0	0	0	0	0	0	0	0	0	1	2013/12/31	129.533	129.533	129.533	129.533	0	0	0	0	0	0	0	0
922	2007	0	4.6817	0	0	0	0	0	0	0	0	0	1	1	1	0	0	1	2013/12/31	21.9667	21.9667	21.9667	21.9667	0	0	0	0	0	0	0	0
923	2007	1	4.6817	0	0	0	0	0	0	0	0	0	0	0	0	0	0	0	2013/12/31	22.0667	22.0667	22.0667	22.0667	0	0	0	0	0	0	0	0
924	2006	1	4.6817	0	0	0	0	0	0	0	0	0	0	0	0	0	0	1	2013/12/31	36.3	36.3	36.3	36.3	0	0	0	0	0	0	0	0
925	1996	0	4.6817	0	0	0	0	0	0	0	0	0	0	0	0	0	0	0	2013/12/31	158	158	158	158	0	0	0	0	0	0	0	0
926	1996	1	4.6817	0	0	0	0	0	0	0	0	0	0	0	0	0	0	1	2013/12/31	158	158	158	158	0	0	0	0	0	0	0	0
927	2004	1	4.679	0	0	0	0	0	0	0	0	0	1	1	1	1	0	1	2013/12/31	0.6667	0.6667	0.6667	61.5667	0	0	0	0	1	1	1	0
928	2007	1	4.679	0	0	0	1	0	1	1	0	0	0	0	0	0	0	1	2013/12/31	21.0333	21.0333	21.0333	21.0333	0	0	0	0	0	0	0	0
929	2002	1	4.679	0	0	0	0	0	0	0	0	0	0	0	0	0	0	1	2013/12/31	89.0333	89.0333	89.0333	89.0333	0	0	0	0	0	0	0	0
930	1997	1	4.6762	0	0	0	0	0	0	0	0	0	0	0	0	0	0	1	2002/04/16	1.3333	1.3333	1.3333	1.3333	0	0	0	0	0	0	0	0
931	2007	0	4.6735	0	0	0	0	0	1	1	0	0	0	0	0	0	0	0	2013/12/31	18.8333	18.8333	18.8333	18.8333	0	0	0	0	0	0	0	0
932	2007	1	4.6735	0	0	0	0	0	1	1	0	0	0	0	0	0	0	1	2013/12/31	19	19	19	19	0	0	0	0	0	0	0	0
933	2007	1	4.6735	0	0	0	0	0	0	0	0	0	0	0	0	0	0	0	2013/12/31	19.1	19.1	19.1	19.1	0	0	0	0	0	0	0	0
934	2001	1	4.6735	0	0	0	0	0	1	0	0	1	0	0	0	0	0	1	2013/12/31	93.9667	93.9667	93.9667	93.9667	0	0	0	0	0	0	0	0
935	2001	1	4.6735	0	0	0	0	0	0	0	0	0	0	0	0	0	0	0	2013/12/31	94.2333	94.2333	94.2333	94.2333	0	0	0	0	0	0	0	0
936	2001	0	4.6735	0	0	0	0	0	0	0	0	0	0	0	0	0	0	0	2013/12/31	94.2333	94.2333	94.2333	94.2333	0	0	0	0	0	0	0	0
937	1996	1	4.6735	0	0	0	0	0	0	0	0	0	0	0	0	0	0	1	2013/12/31	154	154	154	154	0	0	0	0	0	0	0	0
938	1996	0	4.6735	0	0	0	0	0	0	0	0	0	0	0	0	0	0	0	2013/12/31	154.033	154.033	154.033	154.033	0	0	0	0	0	0	0	0
939	1997	0	4.6708	0	0	1	0	0	1	1	0	0	0	0	0	0	0	1	2013/12/31	5.8	5.8	140.833	140.833	1	1	0	0	1	1	0	0
940	2006	1	4.6708	0	0	0	0	0	0	0	0	0	0	0	0	0	0	1	2013/12/31	31.3333	31.3333	31.3333	31.3333	0	0	0	0	0	0	0	0
941	1997	1	4.6708	0	0	0	0	0	0	0	0	0	0	0	0	0	0	0	2013/12/31	140.867	140.867	140.867	140.867	0	0	0	0	0	0	0	0
942	1997	1	4.6708	0	0	0	0	0	0	0	0	0	0	0	0	0	0	0	2013/12/31	140.867	140.867	140.867	140.867	0	0	0	0	0	0	0	0
943	2001	1	4.668	0	0	0	0	0	1	1	0	0	1	1	1	0	0	1	2013/12/31	6.8333	93.1333	6.8333	93.1333	1	0	1	0	1	0	1	0
944	2004	0	4.668	0	0	0	0	0	0	0	0	0	0	0	0	0	0	1	2013/12/31	53.4667	53.4667	53.4667	53.4667	0	0	0	0	0	0	0	0
945	2003	1	4.668	0	0	0	0	0	0	0	0	0	0	0	0	0	0	1	2013/12/31	72.9333	72.9333	72.9333	72.9333	0	0	0	0	0	0	0	0
946	1996	1	4.6626	0	0	0	0	0	0	0	0	0	0	0	0	0	0	1	2013/12/31	0.1333	0.1333	151	151	0	0	0	0	0	0	0	0
947	1996	0	4.6626	0	0	0	0	0	0	0	0	0	1	1	1	0	1	0	2013/12/31	151	151	151	151	0	0	0	0	0	0	0	0
948	1996	0	4.6626	0	0	0	0	0	0	0	0	0	0	0	0	0	0	0	2013/12/31	151.067	151.067	151.067	151.067	0	0	0	0	0	0	0	0
949	1996	1	4.6626	0	0	0	0	0	0	0	0	0	0	0	0	0	0	0	2013/12/31	151.067	151.067	151.067	151.067	0	0	0	0	0	0	0	0
950	2000	1	4.6598	0	0	0	0	0	0	0	0	0	0	0	0	0	0	1	2013/12/31	109.433	109.433	109.433	109.433	0	0	0	0	0	0	0	0
951	2008	0	4.6571	0	0	0	0	0	0	0	0	0	0	0	0	0	0	1	2013/12/31	12.0667	12.0667	12.0667	12.0667	0	0	0	0	0	0	0	0
952	2008	0	4.6571	0	0	0	0	0	1	0	0	1	0	0	0	0	0	1	2013/12/31	12.1667	12.1667	12.1667	12.1667	0	0	0	0	0	0	0	0
953	2006	1	4.6516	0	0	0	0	0	0	0	0	0	0	0	0	0	0	0	2013/12/31	31.5	31.5	31.5	31.5	0	0	0	0	0	0	0	0
954	2006	0	4.6516	0	0	0	0	0	0	0	0	0	0	0	0	0	0	1	2013/12/31	31.5333	31.5333	31.5333	31.5333	0	0	0	0	0	0	0	0
955	1996	0	4.6516	0	0	0	0	0	0	0	0	0	0	0	0	0	0	1	2013/12/31	159.367	159.367	159.367	159.367	0	0	0	0	0	0	0	0
956	2001	1	4.6489	0	0	0	0	0	1	0	1	0	0	0	0	0	0	1	2013/12/31	93.3667	93.3667	93.3667	93.3667	0	0	0	0	0	0	0	0
957	2001	1	4.6489	0	0	1	1	0	1	1	1	1	0	0	0	0	0	0	2013/12/31	93.5	93.5	93.5	93.5	0	0	0	0	0	0	0	0
958	1998	0	4.6461	0	0	0	0	0	0	0	0	0	0	0	0	0	0	1	2013/12/31	136	136	136	136	0	0	0	0	0	0	0	0
959	1996	0	4.6461	0	0	0	0	0	0	0	0	0	0	0	0	0	0	0	2013/12/31	151.3	151.3	151.3	151.3	0	0	0	0	0	0	0	0
960	1996	1	4.6461	0	0	0	0	0	0	0	0	0	0	0	0	0	0	1	2013/12/31	151.3	151.3	151.3	151.3	0	0	0	0	0	0	0	0
961	1996	1	4.6461	0	0	0	0	0	0	0	0	0	0	0	0	0	0	1	2013/12/31	158.367	158.367	158.367	158.367	0	0	0	0	0	0	0	0
962	2002	1	4.6434	0	0	0	0	0	0	0	0	0	0	0	0	0	0	1	2013/12/31	1.7667	1.7667	82.4	82.4	1	1	0	0	1	1	0	0
963	1997	0	4.6379	0	0	0	0	0	0	0	0	0	0	0	0	0	0	1	2013/12/31	1.4	1.4	149.2	149.2	1	1	0	0	1	1	0	0
964	2001	0	4.6379	0	0	0	0	0	1	1	0	0	1	1	0	1	0	0	2013/12/31	8.4	8.4	97.5667	97.5667	1	1	0	0	1	1	0	0
965	2001	1	4.6379	0	0	0	0	0	0	0	0	0	0	0	0	0	0	1	2013/12/31	97.5667	97.5667	97.5667	97.5667	0	0	0	0	0	0	0	0
966	2001	1	4.6379	0	0	0	0	0	1	1	0	1	0	0	0	0	0	0	2013/12/31	97.6667	97.6667	97.6667	97.6667	0	0	0	0	0	0	0	0
967	2001	0	4.6379	0	0	0	0	0	0	0	0	0	0	0	0	0	0	0	2013/12/31	97.6667	97.6667	97.6667	97.6667	0	0	0	0	0	0	0	0
968	1996	1	4.6379	0	0	0	0	0	0	0	0	0	0	0	0	0	0	1	2013/12/31	161.467	161.467	161.467	161.467	0	0	0	0	0	0	0	0
969	1996	1	4.6379	0	0	0	0	0	1	1	0	0	1	1	1	0	0	0	2013/12/31	161.5	161.5	161.5	161.5	0	0	0	0	0	0	0	0
970	2000	0	4.6324	0	0	1	0	0	1	1	1	0	1	0	0	0	1	0	2013/12/31	0.7333	107.8	107.8	0.7333	0	0	0	0	1	0	0	1
971	2000	1	4.6324	0	0	0	0	0	0	0	0	0	0	0	0	0	0	1	2013/12/31	107.567	107.567	107.567	107.567	0	0	0	0	0	0	0	0
972	2000	0	4.6324	0	0	0	0	0	1	0	1	0	1	0	0	0	1	0	2013/12/31	107.9	107.9	107.9	107.9	0	0	0	0	0	0	0	0
973	2001	0	4.6297	0	0	0	0	0	0	0	0	0	1	1	0	1	0	1	2013/12/31	9.3333	95.5667	95.5667	9.3333	1	0	0	1	1	0	0	1
974	2008	0	4.627	0	0	0	0	0	0	0	0	0	0	0	0	0	0	1	2013/12/31	13.4667	13.4667	13.4667	13.4667	0	0	0	0	0	0	0	0
975	2002	1	4.627	0	0	0	0	0	0	0	0	0	0	0	0	0	0	1	2013/12/31	79.4	79.4	79.4	79.4	0	0	0	0	0	0	0	0
976	2002	1	4.627	0	0	1	0	0	1	1	0	1	1	1	1	0	0	0	2013/12/31	79.5	79.5	79.5	79.5	0	0	0	0	0	0	0	0
977	2002	0	4.627	0	0	0	0	0	0	0	0	0	0	0	0	0	0	0	2013/12/31	79.5667	79.5667	79.5667	79.5667	0	0	0	0	0	0	0	0
978	1996	1	4.6242	0	0	0	0	0	0	0	0	0	0	0	0	0	0	1	2013/12/31	154.6	154.6	154.6	154.6	0	0	0	0	0	0	0	0
979	1996	1	4.6242	0	0	0	0	0	0	0	0	0	0	0	0	0	0	0	2013/12/31	154.6	154.6	154.6	154.6	0	0	0	0	0	0	0	0
980	1996	1	4.6242	0	0	0	0	0	0	0	0	0	0	0	0	0	0	1	2013/12/31	162.733	162.733	162.733	162.733	0	0	0	0	0	0	0	0
981	2008	1	4.6215	0	0	0	0	0	0	0	0	0	0	0	0	0	0	1	2013/12/31	13.5667	13.5667	13.5667	13.5667	0	0	0	0	0	0	0	0
982	2001	1	4.6215	0	0	0	0	0	0	0	0	0	0	0	0	0	0	0	2013/12/31	101.667	101.667	101.667	101.667	0	0	0	0	0	0	0	0
983	2001	0	4.6215	0	0	0	0	0	0	0	0	0	0	0	0	0	0	1	2013/12/31	101.867	101.867	101.867	101.867	0	0	0	0	0	0	0	0
984	2002	1	4.6188	0	0	0	0	0	0	0	0	0	0	0	0	0	0	0	2013/12/31	82.6667	82.6667	82.6667	82.6667	0	0	0	0	0	0	0	0
985	2002	1	4.6188	0	0	1	0	0	1	1	0	0	1	0	0	0	1	1	2013/12/31	82.7	82.7	82.7	82.7	0	0	0	0	0	0	0	0
986	2000	1	4.616	0	0	0	0	0	0	0	0	0	1	1	1	0	0	1	2013/12/31	111.067	111.067	111.067	111.067	0	0	0	0	0	0	0	0
987	2003	0	4.6133	0	0	0	0	0	1	1	0	0	0	0	0	0	0	1	2013/12/31	11.8	11.8	68.4667	68.4667	1	1	0	0	1	1	0	0
988	2006	1	4.6133	0	0	0	0	0	0	0	0	0	0	0	0	0	0	1	2013/12/31	34.9	34.9	34.9	34.9	0	0	0	0	0	0	0	0
989	2006	1	4.6133	0	0	0	0	0	0	0	0	0	0	0	0	0	0	0	2013/12/31	35.1	35.1	35.1	35.1	0	0	0	0	0	0	0	0
990	2006	1	4.6133	0	0	0	0	0	1	1	0	0	0	0	0	0	0	0	2013/12/31	35.1	35.1	35.1	35.1	0	0	0	0	0	0	0	0
991	2001	1	4.6133	0	0	0	0	0	1	1	0	1	0	0	0	0	0	1	2013/12/31	98.9333	98.9333	98.9333	98.9333	0	0	0	0	0	0	0	0
992	1999	1	4.6133	0	0	0	0	0	0	0	0	0	0	0	0	0	0	1	2013/12/31	116.167	116.167	116.167	116.167	0	0	0	0	0	0	0	0
993	2005	0	4.6078	0	0	0	0	0	0	0	0	0	1	1	1	0	0	1	2013/12/31	44.1333	44.1333	44.1333	44.1333	0	0	0	0	0	0	0	0
994	2000	0	4.6078	0	0	0	0	0	0	0	0	0	0	0	0	0	0	0	2013/12/31	113.167	113.167	113.167	113.167	0	0	0	0	0	0	0	0
995	2000	0	4.6078	0	0	0	0	0	0	0	0	0	0	0	0	0	0	1	2013/12/31	113.167	113.167	113.167	113.167	0	0	0	0	0	0	0	0
996	2007	1	4.6023	0	0	0	0	0	0	0	0	0	0	0	0	0	0	1	2013/12/31	23	23	23	23	0	0	0	0	0	0	0	0
997	2007	1	4.6023	0	0	0	0	0	0	0	0	0	0	0	0	0	0	0	2013/12/31	23.0667	23.0667	23.0667	23.0667	0	0	0	0	0	0	0	0
998	2005	1	4.6023	0	0	0	0	0	0	0	0	0	0	0	0	0	0	1	2013/12/31	46.2	46.2	46.2	46.2	0	0	0	0	0	0	0	0
999	2003	1	4.6023	0	0	0	0	0	1	1	1	0	1	1	1	0	0	1	2013/12/31	75.8333	75.8333	75.8333	75.8333	0	0	0	0	0	0	0	0
1000	2002	1	4.6023	0	0	0	0	0	0	0	0	0	0	0	0	0	0	0	2013/12/31	81.7	81.7	81.7	81.7	0	0	0	0	0	0	0	0
1001	2002	1	4.6023	0	0	0	0	0	0	0	0	0	0	0	0	0	0	1	2013/12/31	81.8333	81.8333	81.8333	81.8333	0	0	0	0	0	0	0	0
1002	2007	1	4.5996	0	0	0	0	0	0	0	0	0	0	0	0	0	0	1	2013/12/31	22.0333	22.0333	22.0333	22.0333	0	0	0	0	0	0	0	0
1003	2007	0	4.5996	0	0	0	0	0	0	0	0	0	0	0	0	0	0	0	2013/12/31	22.0667	22.0667	22.0667	22.0667	0	0	0	0	0	0	0	0
1004	2007	1	4.5969	0	0	0	0	0	0	0	0	0	0	0	0	0	0	1	2013/12/31	19	19	19	19	0	0	0	0	0	0	0	0
1005	2007	0	4.5969	0	0	0	0	0	0	0	0	0	0	0	0	0	0	0	2013/12/31	19.0333	19.0333	19.0333	19.0333	0	0	0	0	0	0	0	0
1006	2005	0	4.5969	0	0	0	0	0	0	0	0	0	0	0	0	0	0	0	2013/12/31	42.2333	42.2333	42.2333	42.2333	0	0	0	0	0	0	0	0
1007	2005	1	4.5969	0	0	0	0	0	0	0	0	0	0	0	0	0	0	1	2013/12/31	42.3333	42.3333	42.3333	42.3333	0	0	0	0	0	0	0	0
1008	1996	1	4.5941	0	0	0	0	0	0	0	0	0	0	0	0	0	0	0	2013/12/31	1.5333	1.5333	151.833	151.833	1	1	0	0	1	1	0	0
1009	1996	1	4.5941	0	0	0	0	0	0	0	0	0	1	0	0	0	1	0	2013/12/31	4.8667	4.8667	152.9	152.9	1	1	0	0	1	1	0	0
1010	1997	0	4.5941	0	0	0	0	0	0	0	0	0	0	0	0	0	0	0	2013/12/31	141.733	141.733	141.733	141.733	0	0	0	0	0	0	0	0
1011	1997	1	4.5941	0	0	0	0	0	0	0	0	0	0	0	0	0	0	1	2013/12/31	141.833	141.833	141.833	141.833	0	0	0	0	0	0	0	0
1012	1996	1	4.5941	0	0	0	0	0	0	0	0	0	0	0	0	0	0	0	2013/12/31	152.867	152.867	152.867	152.867	0	0	0	0	0	0	0	0
1013	1996	1	4.5941	0	0	0	0	0	0	0	0	0	0	0	0	0	0	0	2013/12/31	152.967	152.967	152.967	152.967	0	0	0	0	0	0	0	0
1014	2003	1	4.5914	0	0	0	0	0	1	1	0	0	0	0	0	0	0	1	2013/12/31	74.8	74.8	74.8	74.8	0	0	0	0	0	0	0	0
1015	2003	1	4.5914	0	0	0	0	0	0	0	0	0	0	0	0	0	0	0	2013/12/31	74.8333	74.8333	74.8333	74.8333	0	0	0	0	0	0	0	0
1016	2003	1	4.5914	0	0	1	0	0	1	1	0	0	0	0	0	0	0	0	2013/12/31	75	75	75	75	0	0	0	0	0	0	0	0
1017	2001	0	4.5914	0	0	0	0	0	0	0	0	0	0	0	0	0	0	1	2013/12/31	93.8667	93.8667	93.8667	93.8667	0	0	0	0	0	0	0	0
1018	2001	1	4.5914	0	0	0	0	0	1	1	0	0	1	1	1	0	0	0	2013/12/31	93.9333	93.9333	93.9333	93.9333	0	0	0	0	0	0	0	0
1019	2001	0	4.5914	0	0	0	0	0	0	0	0	0	0	0	0	0	0	1	2013/12/31	96.1	96.1	96.1	96.1	0	0	0	0	0	0	0	0
1020	2006	1	4.5886	0	0	0	0	0	0	0	0	0	0	0	0	0	0	1	2013/12/31	39.3333	39.3333	39.3333	39.3333	0	0	0	0	0	0	0	0
1021	2006	1	4.5886	0	0	0	0	0	0	0	0	0	0	0	0	0	0	0	2013/12/31	39.5333	39.5333	39.5333	39.5333	0	0	0	0	0	0	0	0
1022	1998	0	4.5886	0	0	0	0	0	1	1	0	0	0	0	0	0	0	1	2013/12/31	128.6	128.6	128.6	128.6	0	0	0	0	0	0	0	0
1023	1996	1	4.5886	0	0	0	0	0	0	0	0	0	0	0	0	0	0	1	2013/12/31	156.833	156.833	156.833	156.833	0	0	0	0	0	0	0	0
1024	1996	1	4.5886	0	0	0	0	0	0	0	0	0	0	0	0	0	0	0	2013/12/31	157.133	157.133	157.133	157.133	0	0	0	0	0	0	0	0
1025	2002	0	4.5832	0	0	0	0	0	0	0	0	0	0	0	0	0	0	1	2013/12/31	85.0333	85.0333	85.0333	85.0333	0	0	0	0	0	0	0	0
1026	2002	1	4.5832	0	0	0	0	0	1	1	1	0	1	0	0	0	1	0	2013/12/31	85.1333	85.1333	85.1333	85.1333	0	0	0	0	0	0	0	0
1027	2004	1	4.5804	0	0	0	0	0	0	0	0	0	0	0	0	0	0	1	2013/12/31	59.8	59.8	59.8	59.8	0	0	0	0	0	0	0	0
1028	2003	0	4.5777	0	0	0	0	0	0	0	0	0	1	1	1	0	0	1	2013/12/31	78	78	78	78	0	0	0	0	0	0	0	0
1029	2003	1	4.5777	0	0	0	0	0	1	1	1	0	1	1	1	0	0	0	2013/12/31	78.0667	78.0667	78.0667	78.0667	0	0	0	0	0	0	0	0
1030	1999	0	4.5722	0	0	0	0	0	0	0	0	0	0	0	0	0	0	1	2013/12/31	119.7	119.7	119.7	119.7	0	0	0	0	0	0	0	0
1031	2003	0	4.5695	0	0	0	0	0	0	0	0	0	0	0	0	0	0	0	2013/12/31	3.4333	3.4333	70.0333	70.0333	1	1	0	0	1	1	0	0
1032	2003	1	4.5695	0	0	0	0	0	0	0	0	0	0	0	0	0	0	1	2013/12/31	69.9	69.9	69.9	69.9	0	0	0	0	0	0	0	0
1033	2003	1	4.5695	0	0	0	0	0	0	0	0	0	1	0	0	0	1	0	2013/12/31	70	70	70	70	0	0	0	0	0	0	0	0
1034	2003	0	4.5695	0	0	0	0	0	0	0	0	0	0	0	0	0	0	0	2013/12/31	70.0333	70.0333	70.0333	70.0333	0	0	0	0	0	0	0	0
1035	2003	1	4.5695	0	0	0	0	0	1	0	1	0	0	0	0	0	0	0	2013/12/31	70.0333	70.0333	70.0333	70.0333	0	0	0	0	0	0	0	0
1036	2003	1	4.5695	0	0	0	0	0	0	0	0	0	0	0	0	0	0	0	2013/12/31	70.1333	70.1333	70.1333	70.1333	0	0	0	0	0	0	0	0
1037	1997	1	4.5695	0	0	0	0	0	0	0	0	0	0	0	0	0	0	1	2013/12/31	143.133	143.133	143.133	143.133	0	0	0	0	0	0	0	0
1038	2002	1	4.5667	0	0	0	0	0	0	0	0	0	0	0	0	0	0	1	2013/12/31	87.2667	87.2667	87.2667	87.2667	0	0	0	0	0	0	0	0
1039	2002	1	4.5667	0	0	0	0	0	0	0	0	0	0	0	0	0	0	0	2013/12/31	87.4	87.4	87.4	87.4	0	0	0	0	0	0	0	0
1040	2002	1	4.5667	0	0	0	0	0	0	0	0	0	0	0	0	0	0	0	2013/12/31	87.4	87.4	87.4	87.4	0	0	0	0	0	0	0	0
1041	1996	1	4.564	0	0	0	0	0	0	0	0	0	0	0	0	0	0	1	2013/12/31	159.367	159.367	159.367	159.367	0	0	0	0	0	0	0	0
1042	2002	1	4.5613	0	0	0	0	0	0	0	0	0	1	1	1	1	0	1	2013/12/31	80.2333	80.2333	80.2333	80.2333	0	0	0	0	0	0	0	0
1043	2002	1	4.5613	0	0	0	0	0	0	0	0	0	0	0	0	0	0	0	2013/12/31	80.3333	80.3333	80.3333	80.3333	0	0	0	0	0	0	0	0
1044	1997	0	4.5585	0	0	0	0	0	0	0	0	0	0	0	0	0	0	0	2013/12/31	145.167	145.167	145.167	145.167	0	0	0	0	0	0	0	0
1045	1997	1	4.5585	0	0	0	0	0	0	0	0	0	0	0	0	0	0	1	2013/12/31	145.233	145.233	145.233	145.233	0	0	0	0	0	0	0	0
1046	2005	1	4.5558	0	0	0	0	0	0	0	0	0	1	1	1	0	0	0	2013/12/31	42.8	42.8	42.8	42.8	0	0	0	0	0	0	0	0
1047	2005	1	4.5558	0	0	0	0	0	0	0	0	0	0	0	0	0	0	1	2013/12/31	42.8	42.8	42.8	42.8	0	0	0	0	0	0	0	0
1048	1999	0	4.5558	0	0	0	0	0	0	0	0	0	0	0	0	0	0	1	2013/12/31	120.867	120.867	120.867	120.867	0	0	0	0	0	0	0	0
1049	1999	1	4.5558	0	0	0	0	0	0	0	0	0	0	0	0	0	0	0	2013/12/31	120.9	120.9	120.9	120.9	0	0	0	0	0	0	0	0
1050	2005	1	4.553	0	0	0	0	0	0	0	0	0	0	0	0	0	0	1	2013/12/31	44.6333	44.6333	44.6333	44.6333	0	0	0	0	0	0	0	0
1051	1996	1	4.553	0	0	0	0	0	0	0	0	0	0	0	0	0	0	1	2013/12/31	155.433	155.433	155.433	155.433	0	0	0	0	0	0	0	0
1052	2005	1	4.5503	0	0	0	0	0	0	0	0	0	0	0	0	0	0	1	2013/12/31	45.9	45.9	45.9	45.9	0	0	0	0	0	0	0	0
1053	2002	1	4.5448	0	0	0	0	0	0	0	0	0	1	1	1	0	0	1	2013/12/31	6.6667	6.6667	83.3667	83.3667	1	1	0	0	1	1	0	0
1054	2003	1	4.5448	0	0	0	0	0	0	0	0	0	1	1	1	1	0	1	2013/12/31	69.1	69.1	69.1	69.1	0	0	0	0	0	0	0	0
1055	1997	1	4.5394	0	0	0	0	0	0	0	0	0	1	0	0	0	1	0	2013/12/31	0.1333	142.5	142.5	0.1333	0	0	0	0	0	0	0	0
1056	2006	1	4.5394	0	0	0	0	0	0	0	0	0	1	1	1	0	0	1	2013/12/31	34.7	34.7	34.7	34.7	0	0	0	0	0	0	0	0
1057	2006	0	4.5394	0	0	0	0	0	1	0	0	1	0	0	0	0	0	0	2013/12/31	34.9667	34.9667	34.9667	34.9667	0	0	0	0	0	0	0	0
1058	1999	1	4.5394	0	0	0	0	0	1	1	1	0	1	1	1	0	0	1	2013/12/31	116.967	116.967	116.967	116.967	0	0	0	0	0	0	0	0
1059	1999	1	4.5394	0	0	0	0	0	0	0	0	0	0	0	0	0	0	0	2013/12/31	117.067	117.067	117.067	117.067	0	0	0	0	0	0	0	0
1060	1998	1	4.5394	0	0	0	0	0	0	0	0	0	0	0	0	0	0	1	2013/12/31	135.3	135.3	135.3	135.3	0	0	0	0	0	0	0	0
1061	1998	0	4.5394	0	0	0	0	0	0	0	0	0	0	0	0	0	0	0	2013/12/31	135.433	135.433	135.433	135.433	0	0	0	0	0	0	0	0
1062	1997	1	4.5394	0	0	0	0	0	1	0	0	1	1	1	0	1	1	1	2013/12/31	142.367	142.367	142.367	142.367	0	0	0	0	0	0	0	0
1063	1997	0	4.5394	0	0	0	0	0	1	1	0	0	0	0	0	0	0	0	2013/12/31	142.433	142.433	142.433	142.433	0	0	0	0	0	0	0	0
1064	2006	1	4.5366	0	0	0	0	0	0	0	0	0	0	0	0	0	0	0	2013/12/31	32.9333	32.9333	32.9333	32.9333	0	0	0	0	0	0	0	0
1065	2003	1	4.5366	0	0	0	0	0	0	0	0	0	0	0	0	0	0	1	2013/12/31	71.5	71.5	71.5	71.5	0	0	0	0	0	0	0	0
1066	2000	1	4.5366	0	0	0	0	0	0	0	0	0	1	1	1	0	0	1	2013/12/31	103.933	103.933	103.933	103.933	0	0	0	0	0	0	0	0
1067	1997	0	4.5366	0	0	0	0	0	0	0	0	0	1	1	0	1	0	1	2013/12/31	140.267	140.267	140.267	140.267	0	0	0	0	0	0	0	0
1068	1997	0	4.5366	0	0	1	0	0	1	1	0	0	1	1	0	1	0	0	2013/12/31	140.4	140.4	140.4	140.4	0	0	0	0	0	0	0	0
1069	1997	1	4.5366	0	0	0	0	0	0	0	0	0	0	0	0	0	0	0	2013/12/31	140.5	140.5	140.5	140.5	0	0	0	0	0	0	0	0
1070	1997	1	4.5366	1	0	0	0	0	0	0	0	0	0	0	0	0	0	1	2013/12/31	141.4	141.4	141.4	141.4	0	0	0	0	0	0	0	0
1071	2001	1	4.5339	0	0	0	0	0	0	0	0	0	0	0	0	0	0	1	2013/12/31	97.6667	97.6667	97.6667	97.6667	0	0	0	0	0	0	0	0
1072	1997	0	4.5339	0	0	0	0	0	1	0	0	1	0	0	0	0	0	1	2013/12/31	141.1	141.1	141.1	141.1	0	0	0	0	0	0	0	0
1073	1997	0	4.5339	0	0	0	0	0	1	1	1	0	0	0	0	0	0	0	2013/12/31	141.533	141.533	141.533	141.533	0	0	0	0	0	0	0	0
1074	1999	0	4.5311	0	0	0	0	0	0	0	0	0	1	0	0	0	1	1	2013/12/31	127.167	127.167	127.167	127.167	0	0	0	0	0	0	0	0
1075	1997	1	4.5311	0	0	0	0	0	0	0	0	0	1	1	1	0	0	1	2013/12/31	141.5	141.5	141.5	141.5	0	0	0	0	0	0	0	0
1076	2001	0	4.5284	0	0	0	0	0	0	0	0	0	0	0	0	0	0	0	2013/12/31	1.2333	10.5667	97	1.2333	1	1	0	1	1	1	0	1
1077	2000	0	4.5284	0	0	1	0	0	1	1	0	0	1	0	0	0	1	0	2013/12/31	1.9667	1.9667	109.167	109.167	1	1	0	0	1	1	0	0
1078	2004	0	4.5284	0	0	0	0	0	0	0	0	0	0	0	0	0	0	0	2013/12/31	58.2667	58.2667	58.2667	58.2667	0	0	0	0	0	0	0	0
1079	2004	1	4.5284	0	0	1	0	0	1	1	0	0	0	0	0	0	0	0	2013/12/31	58.3667	58.3667	58.3667	58.3667	0	0	0	0	0	0	0	0
1080	2001	1	4.5284	0	0	0	1	0	1	1	1	1	0	0	0	0	0	0	2013/12/31	96.8	96.8	96.8	96.8	0	0	0	0	0	0	0	0
1081	2001	0	4.5284	0	0	0	0	0	0	0	0	0	0	0	0	0	0	1	2013/12/31	96.9	96.9	96.9	96.9	0	0	0	0	0	0	0	0
1082	2000	1	4.5284	0	0	0	0	0	0	0	0	0	0	0	0	0	0	0	2013/12/31	109.1	109.1	109.1	109.1	0	0	0	0	0	0	0	0
1083	1996	0	4.5257	0	0	0	0	0	0	0	0	0	0	0	0	0	0	1	2013/12/31	155.633	155.633	155.633	155.633	0	0	0	0	0	0	0	0
1084	1996	1	4.5257	0	0	0	0	0	0	0	0	0	0	0	0	0	0	0	2013/12/31	155.8	155.8	155.8	155.8	0	0	0	0	0	0	0	0
1085	1996	0	4.5257	0	0	0	0	0	0	0	0	0	0	0	0	0	0	0	2013/12/31	155.833	155.833	155.833	155.833	0	0	0	0	0	0	0	0
1086	1997	1	4.5229	0	0	0	0	0	0	0	0	0	0	0	0	0	0	0	2013/12/31	7.3333	7.3333	145.8	145.8	1	1	0	0	1	1	0	0
1087	2002	1	4.5229	0	0	0	0	0	0	0	0	0	0	0	0	0	0	1	2013/12/31	87.8667	87.8667	87.8667	87.8667	0	0	0	0	0	0	0	0
1088	1997	0	4.5229	0	0	0	0	0	0	0	0	0	0	0	0	0	0	1	2013/12/31	145.633	145.633	145.633	145.633	0	0	0	0	0	0	0	0
1089	1997	1	4.5229	0	0	0	0	0	0	0	0	0	0	0	0	0	0	0	2013/12/31	145.8	145.8	145.8	145.8	0	0	0	0	0	0	0	0
1090	2008	1	4.5202	0	0	0	0	0	1	1	0	0	0	0	0	0	0	1	2013/12/31	13.9	13.9	13.9	13.9	0	0	0	0	0	0	0	0
1091	2002	1	4.5175	0	0	1	0	0	1	1	0	1	0	0	0	0	0	0	2013/12/31	7.3	83.8333	83.8333	7.3	1	0	0	1	1	0	0	1
1092	2002	1	4.5175	0	0	0	0	0	0	0	0	0	0	0	0	0	0	0	2013/12/31	83.9	83.9	83.9	83.9	0	0	0	0	0	0	0	0
1093	2002	0	4.5175	0	0	1	1	0	1	0	0	1	0	0	0	0	0	1	2013/12/31	83.9	83.9	83.9	83.9	0	0	0	0	0	0	0	0
1094	1998	0	4.512	0	0	0	0	0	1	1	1	1	1	1	1	0	0	1	2013/12/31	1.3333	135.367	135.367	1.3333	1	0	0	1	1	0	0	1
1095	2007	1	4.512	0	0	0	0	0	0	0	0	0	0	0	0	0	0	1	2013/12/31	20.8667	20.8667	20.8667	20.8667	0	0	0	0	0	0	0	0
1096	2003	0	4.5092	0	0	1	0	0	1	1	0	0	1	1	1	0	0	1	2013/12/31	68.6	68.6	68.6	68.6	0	0	0	0	0	0	0	0
1097	2003	0	4.5092	0	0	0	0	0	0	0	0	0	0	0	0	0	0	1	2013/12/31	68.6333	68.6333	68.6333	68.6333	0	0	0	0	0	0	0	0
1098	2003	1	4.5092	0	0	0	0	0	0	0	0	0	0	0	0	0	0	0	2013/12/31	68.7	68.7	68.7	68.7	0	0	0	0	0	0	0	0
1099	2005	1	4.5065	0	0	0	0	0	0	0	0	0	1	0	0	0	1	1	2012/04/03	6.3333	27.9333	27.9333	6.3333	1	0	0	1	1	0	0	1
1100	2005	1	4.5065	0	0	1	1	0	1	1	0	0	0	0	0	0	0	1	2013/12/31	46.3	46.3	46.3	46.3	0	0	0	0	0	0	0	0
1101	2005	1	4.5065	0	0	0	0	0	0	0	0	0	0	0	0	0	0	0	2013/12/31	46.5	46.5	46.5	46.5	0	0	0	0	0	0	0	0
1102	2005	1	4.5065	0	0	0	0	0	0	0	0	0	0	0	0	0	0	0	2013/12/31	49.5	49.5	49.5	49.5	0	0	0	0	0	0	0	0
1103	2000	0	4.5065	0	0	0	0	0	0	0	0	0	1	1	1	0	0	1	2013/12/31	106.267	106.267	106.267	106.267	0	0	0	0	0	0	0	0
1104	2004	1	4.5038	0	0	0	0	0	0	0	0	0	1	0	0	0	1	0	2013/12/31	2.9	60.6667	60.6667	2.9	1	0	0	1	1	0	0	1
1105	2004	1	4.5038	0	0	0	0	0	0	0	0	0	0	0	0	0	0	1	2013/12/31	60.1667	60.1667	60.1667	60.1667	0	0	0	0	0	0	0	0
1106	2004	0	4.5038	0	0	0	0	0	0	0	0	0	0	0	0	0	0	0	2013/12/31	60.7	60.7	60.7	60.7	0	0	0	0	0	0	0	0
1107	1996	0	4.5038	0	0	0	0	0	0	0	0	0	0	0	0	0	0	0	2013/12/31	164.2	164.2	164.2	164.2	0	0	0	0	0	0	0	0
1108	1996	0	4.5038	0	0	0	0	0	0	0	0	0	0	0	0	0	0	1	2013/12/31	164.2	164.2	164.2	164.2	0	0	0	0	0	0	0	0
1109	1996	0	4.5038	0	0	0	0	0	0	0	0	0	0	0	0	0	0	0	2013/12/31	164.267	164.267	164.267	164.267	0	0	0	0	0	0	0	0
1110	2006	1	4.501	0	0	0	0	0	0	0	0	0	0	0	0	0	0	1	2013/12/31	31.3333	31.3333	31.3333	31.3333	0	0	0	0	0	0	0	0
1111	2006	1	4.501	0	0	0	1	0	1	1	0	1	0	0	0	0	0	0	2013/12/31	32.2667	32.2667	32.2667	32.2667	0	0	0	0	0	0	0	0
1112	2006	0	4.501	0	0	0	0	0	1	1	0	0	0	0	0	0	0	0	2013/12/31	32.3333	32.3333	32.3333	32.3333	0	0	0	0	0	0	0	0
1113	2006	0	4.501	0	0	0	0	0	0	0	0	0	1	1	1	0	0	1	2013/12/31	32.3333	32.3333	32.3333	32.3333	0	0	0	0	0	0	0	0
1114	2003	0	4.501	0	0	0	0	0	0	0	0	0	0	0	0	0	0	1	2013/12/31	71.7333	71.7333	71.7333	71.7333	0	0	0	0	0	0	0	0
1115	2007	1	4.4928	0	0	0	0	0	1	0	1	0	0	0	0	0	0	0	2013/12/31	24.2333	24.2333	24.2333	24.2333	0	0	0	0	0	0	0	0
1116	2007	0	4.4928	0	0	0	0	0	1	0	0	1	0	0	0	0	0	1	2013/12/31	24.3667	24.3667	24.3667	24.3667	0	0	0	0	0	0	0	0
1117	1997	1	4.4928	0	0	1	0	0	1	1	0	0	1	0	0	0	1	1	2013/12/31	147	147	147	147	0	0	0	0	0	0	0	0
1118	2005	1	4.4901	0	0	0	0	0	0	0	0	0	0	0	0	0	0	1	2013/12/31	51.7	51.7	51.7	51.7	0	0	0	0	0	0	0	0
1119	1997	0	4.4846	0	0	0	0	0	1	1	1	1	1	1	0	1	1	0	2013/12/31	1.9667	1.9667	1.9667	141.067	1	1	1	0	1	1	1	0
1120	1997	1	4.4846	0	0	0	0	0	0	0	0	0	0	0	0	0	0	0	2013/12/31	141.033	141.033	141.033	141.033	0	0	0	0	0	0	0	0
1121	1997	1	4.4846	0	0	0	0	0	0	0	0	0	0	0	0	0	0	1	2013/12/31	141.033	141.033	141.033	141.033	0	0	0	0	0	0	0	0
1122	2001	1	4.4791	0	0	0	0	0	0	0	0	0	0	0	0	0	0	1	2013/12/31	94.3667	94.3667	94.3667	94.3667	0	0	0	0	0	0	0	0
1123	2007	1	4.4764	0	0	0	0	0	0	0	0	0	1	0	0	0	1	1	2013/12/31	19.4	19.4	19.4	19.4	0	0	0	0	0	0	0	0
1124	2007	1	4.4764	0	0	0	0	0	0	0	0	0	0	0	0	0	0	1	2013/12/31	21.4667	21.4667	21.4667	21.4667	0	0	0	0	0	0	0	0
1125	2007	1	4.4764	0	0	0	0	0	0	0	0	0	0	0	0	0	0	0	2013/12/31	21.5	21.5	21.5	21.5	0	0	0	0	0	0	0	0
1126	2006	1	4.4764	0	0	1	0	0	1	1	1	0	1	1	1	1	0	1	2013/12/31	32.3667	32.3667	32.3667	32.3667	0	0	0	0	0	0	0	0
1127	2006	1	4.4764	0	0	0	0	0	0	0	0	0	1	1	1	0	0	0	2013/12/31	32.6	32.6	32.6	32.6	0	0	0	0	0	0	0	0
1128	2005	1	4.4736	0	0	0	0	0	1	1	0	0	1	0	0	0	1	0	2013/12/31	7.9333	7.9333	53.9333	53.9333	1	1	0	0	1	1	0	0
1129	2005	0	4.4736	0	0	0	0	0	0	0	0	0	0	0	0	0	0	1	2013/12/31	53.7667	53.7667	53.7667	53.7667	0	0	0	0	0	0	0	0
1130	2005	1	4.4736	0	0	0	0	0	0	0	0	0	0	0	0	0	0	0	2013/12/31	53.8667	53.8667	53.8667	53.8667	0	0	0	0	0	0	0	0
1131	2001	1	4.4736	0	0	0	0	0	0	0	0	0	0	0	0	0	0	0	2013/12/31	92.5333	92.5333	92.5333	92.5333	0	0	0	0	0	0	0	0
1132	2001	1	4.4736	0	0	0	0	0	1	1	0	0	0	0	0	0	0	1	2013/12/31	92.5333	92.5333	92.5333	92.5333	0	0	0	0	0	0	0	0
1133	1997	1	4.4682	0	0	1	1	0	1	1	0	0	1	1	1	1	0	0	2013/12/31	1.2667	1.2667	147.433	147.433	1	1	0	0	1	1	0	0
1134	2002	1	4.4682	0	0	0	0	0	0	0	0	0	1	1	1	1	0	1	2013/12/31	83.3	83.3	83.3	83.3	0	0	0	0	0	0	0	0
1135	2002	1	4.4682	0	0	0	0	0	1	1	0	1	1	1	1	0	0	0	2013/12/31	83.4	83.4	83.4	83.4	0	0	0	0	0	0	0	0
1136	1999	0	4.4682	0	0	0	0	0	1	1	1	1	0	0	0	0	0	1	2013/12/31	118.8	118.8	118.8	118.8	0	0	0	0	0	0	0	0
1137	1999	1	4.4682	0	0	0	0	0	0	0	0	0	0	0	0	0	0	0	2013/12/31	119.033	119.033	119.033	119.033	0	0	0	0	0	0	0	0
1138	1997	0	4.4682	0	0	0	0	0	0	0	0	0	0	0	0	0	0	0	2013/12/31	147.3	147.3	147.3	147.3	0	0	0	0	0	0	0	0
1139	1997	0	4.4682	0	0	0	0	0	0	0	0	0	0	0	0	0	0	1	2013/12/31	147.4	147.4	147.4	147.4	0	0	0	0	0	0	0	0
1140	2002	0	4.4654	0	0	0	0	0	0	0	0	0	0	0	0	0	0	0	2013/12/31	3.6	88.5333	3.6	88.5333	1	0	1	0	1	0	1	0
1141	2007	0	4.4654	0	0	0	0	0	0	0	0	0	0	0	0	0	0	1	2013/12/31	20.5333	20.5333	20.5333	20.5333	0	0	0	0	0	0	0	0
1142	2006	1	4.4654	0	0	0	0	0	1	0	0	1	0	0	0	0	0	1	2013/12/31	35.6667	35.6667	35.6667	35.6667	0	0	0	0	0	0	0	0
1143	2006	0	4.4654	0	0	0	0	0	0	0	0	0	1	1	1	0	0	0	2013/12/31	35.8333	35.8333	35.8333	35.8333	0	0	0	0	0	0	0	0
1144	2004	1	4.4654	0	0	0	0	0	1	0	1	1	0	0	0	0	0	1	2013/12/31	67.3	67.3	67.3	67.3	0	0	0	0	0	0	0	0
1145	2002	1	4.4654	0	0	0	0	0	0	0	0	0	0	0	0	0	0	1	2013/12/31	88.5333	88.5333	88.5333	88.5333	0	0	0	0	0	0	0	0
1146	2002	1	4.4627	0	0	0	0	0	1	0	1	0	0	0	0	0	0	0	2013/12/31	85.5333	85.5333	85.5333	85.5333	0	0	0	0	0	0	0	0
1147	2002	0	4.4627	0	0	0	0	0	0	0	0	0	1	0	0	0	1	1	2013/12/31	85.6	85.6	85.6	85.6	0	0	0	0	0	0	0	0
1148	1997	1	4.4627	0	0	0	0	0	0	0	0	0	0	0	0	0	0	1	2013/12/31	152.133	152.133	152.133	152.133	0	0	0	0	0	0	0	0
1149	1997	0	4.4627	0	0	0	0	0	0	0	0	0	1	1	1	0	0	0	2013/12/31	152.433	152.433	152.433	152.433	0	0	0	0	0	0	0	0
1150	1997	0	4.4627	0	0	1	0	0	1	1	1	0	1	1	1	0	0	0	2013/12/31	152.5	152.5	152.5	152.5	0	0	0	0	0	0	0	0
1151	1997	1	4.4627	0	0	0	0	0	0	0	0	0	0	0	0	0	0	0	2013/12/31	152.533	152.533	152.533	152.533	0	0	0	0	0	0	0	0
1152	1999	0	4.46	0	0	0	0	0	0	0	0	0	0	0	0	0	0	1	2013/12/31	117	117	117	117	0	0	0	0	0	0	0	0
1153	2004	1	4.4545	0	0	0	0	0	0	0	0	0	0	0	0	0	0	0	2013/12/31	10.1	58.3	58.3	10.1	1	0	0	1	1	0	0	1
1154	2004	1	4.4545	0	0	0	0	0	0	0	0	0	0	0	0	0	0	1	2013/12/31	58.2333	58.2333	58.2333	58.2333	0	0	0	0	0	0	0	0
1155	2004	0	4.4545	0	0	0	0	0	0	0	0	0	1	1	1	1	0	0	2013/12/31	58.2333	58.2333	58.2333	58.2333	0	0	0	0	0	0	0	0
1156	1996	0	4.449	1	0	1	0	0	1	1	0	0	0	0	0	0	0	0	2013/12/31	5.2667	8.3333	153.7	5.2667	1	1	0	1	1	1	0	1
1157	2003	0	4.449	0	0	0	0	0	0	0	0	0	0	0	0	0	0	1	2013/12/31	79.5667	79.5667	79.5667	79.5667	0	0	0	0	0	0	0	0
1158	1997	0	4.449	0	0	0	0	0	0	0	0	0	0	0	0	0	0	0	2013/12/31	146.4	146.4	146.4	146.4	0	0	0	0	0	0	0	0
1159	1997	1	4.449	0	0	0	0	0	0	0	0	0	1	0	0	0	1	1	2013/12/31	146.433	146.433	146.433	146.433	0	0	0	0	0	0	0	0
1160	1997	1	4.449	0	0	0	0	0	0	0	0	0	0	0	0	0	0	0	2013/12/31	146.667	146.667	146.667	146.667	0	0	0	0	0	0	0	0
1161	1996	0	4.449	0	0	0	0	0	0	0	0	0	0	0	0	0	0	1	2013/12/31	153.7	153.7	153.7	153.7	0	0	0	0	0	0	0	0
1162	2006	1	4.4463	0	0	0	0	0	1	0	0	1	0	0	0	0	0	1	2013/12/31	31.6333	31.6333	31.6333	31.6333	0	0	0	0	0	0	0	0
1163	2006	0	4.4463	0	0	0	0	0	0	0	0	0	0	0	0	0	0	0	2013/12/31	31.9	31.9	31.9	31.9	0	0	0	0	0	0	0	0
1164	2004	1	4.4463	0	0	0	0	0	1	1	0	0	0	0	0	0	0	1	2013/12/31	62.2667	62.2667	62.2667	62.2667	0	0	0	0	0	0	0	0
1165	2003	1	4.4463	0	0	0	0	0	0	0	0	0	1	1	1	0	0	1	2013/12/31	70.6333	70.6333	70.6333	70.6333	0	0	0	0	0	0	0	0
1166	2000	1	4.4463	0	0	0	0	0	0	0	0	0	0	0	0	0	0	1	2013/12/31	112	112	112	112	0	0	0	0	0	0	0	0
1167	2007	1	4.4408	0	0	0	0	0	0	0	0	0	0	0	0	0	0	1	2013/12/31	25.9333	25.9333	25.9333	25.9333	0	0	0	0	0	0	0	0
1168	1996	1	4.4408	0	0	0	0	0	0	0	0	0	0	0	0	0	0	1	2013/12/31	162.9	162.9	162.9	162.9	0	0	0	0	0	0	0	0
1169	2002	1	4.4381	0	0	0	0	0	0	0	0	0	0	0	0	0	0	1	2013/12/31	88.9333	88.9333	88.9333	88.9333	0	0	0	0	0	0	0	0
1170	2002	1	4.4381	0	0	0	0	0	1	1	0	0	0	0	0	0	0	0	2013/12/31	89	89	89	89	0	0	0	0	0	0	0	0
1171	2007	0	4.4353	0	0	0	0	0	0	0	0	0	0	0	0	0	0	1	2013/12/31	26.9333	26.9333	26.9333	26.9333	0	0	0	0	0	0	0	0
1172	2007	0	4.4353	0	0	0	0	0	0	0	0	0	0	0	0	0	0	0	2013/12/31	27.1667	27.1667	27.1667	27.1667	0	0	0	0	0	0	0	0
1173	2002	0	4.4353	0	0	0	0	0	1	1	0	0	0	0	0	0	0	1	2013/12/31	83.8	83.8	83.8	83.8	0	0	0	0	0	0	0	0
1174	2002	0	4.4353	0	0	1	0	0	1	1	1	0	0	0	0	0	0	1	2013/12/31	91.7	91.7	91.7	91.7	0	0	0	0	0	0	0	0
1175	2001	0	4.4353	0	0	0	0	0	0	0	0	0	0	0	0	0	0	1	2013/12/31	95.8	95.8	95.8	95.8	0	0	0	0	0	0	0	0
1176	2000	1	4.4353	0	0	0	0	0	1	1	1	0	0	0	0	0	0	1	2013/12/31	105.1	105.1	105.1	105.1	0	0	0	0	0	0	0	0
1177	1999	0	4.4353	0	0	0	0	0	0	0	0	0	0	0	0	0	0	1	2013/12/31	127.333	127.333	127.333	127.333	0	0	0	0	0	0	0	0
1178	2000	1	4.4326	0	0	0	1	0	1	0	1	0	1	1	0	1	0	0	2013/12/31	106.1	106.1	106.1	106.1	0	0	0	0	0	0	0	0
1179	2000	0	4.4326	0	0	1	0	0	1	0	0	1	1	1	1	0	0	1	2013/12/31	106.133	106.133	106.133	106.133	0	0	0	0	0	0	0	0
1180	2004	1	4.4244	0	0	0	0	0	1	0	0	1	0	0	0	0	0	1	2013/12/31	60.6	60.6	60.6	60.6	0	0	0	0	0	0	0	0
1181	2001	1	4.4189	0	0	0	0	0	1	0	0	1	1	1	1	0	0	1	2013/12/31	9.2	9.2	95.2	95.2	1	1	0	0	1	1	0	0
1182	1997	1	4.4189	0	0	0	0	0	0	0	0	0	0	0	0	0	0	0	2013/12/31	143.533	143.533	143.533	143.533	0	0	0	0	0	0	0	0
1183	1997	1	4.4189	0	0	0	0	0	0	0	0	0	0	0	0	0	0	1	2013/12/31	143.833	143.833	143.833	143.833	0	0	0	0	0	0	0	0
1184	2003	0	4.4162	1	0	0	0	0	0	0	0	0	1	0	0	0	1	1	2013/12/31	78	78	78	78	0	0	0	0	0	0	0	0
1185	2001	1	4.4162	0	0	0	0	0	0	0	0	0	0	0	0	0	0	1	2013/12/31	103.167	103.167	103.167	103.167	0	0	0	0	0	0	0	0
1186	1998	1	4.4162	0	0	0	0	0	0	0	0	0	0	0	0	0	0	1	2013/12/31	138.933	138.933	138.933	138.933	0	0	0	0	0	0	0	0
1187	2000	1	4.4134	0	0	1	0	0	1	1	0	0	1	1	0	1	0	1	2013/12/31	111.4	111.4	111.4	111.4	0	0	0	0	0	0	0	0
1188	1997	0	4.4134	0	0	0	0	0	0	0	0	0	0	0	0	0	0	1	2013/12/31	144	144	144	144	0	0	0	0	0	0	0	0
1189	2003	1	4.4107	0	0	1	0	0	1	1	1	0	1	0	0	0	1	1	2013/12/31	68.7	68.7	68.7	68.7	0	0	0	0	0	0	0	0
1190	2007	1	4.4079	0	0	0	0	0	0	0	0	0	0	0	0	0	0	1	2013/12/31	31.5333	31.5333	31.5333	31.5333	0	0	0	0	0	0	0	0
1191	2001	1	4.4079	0	0	0	0	0	0	0	0	0	0	0	0	0	0	1	2013/12/31	95.2333	95.2333	95.2333	95.2333	0	0	0	0	0	0	0	0
1192	2001	1	4.4052	0	0	0	0	0	0	0	0	0	1	1	1	0	0	1	2013/12/31	94.3	94.3	94.3	94.3	0	0	0	0	0	0	0	0
1193	2001	1	4.4052	0	0	0	0	0	0	0	0	0	0	0	0	0	0	0	2013/12/31	94.3667	94.3667	94.3667	94.3667	0	0	0	0	0	0	0	0
1194	1999	1	4.4052	0	0	0	0	0	0	0	0	0	0	0	0	0	0	1	2013/12/31	118.7	118.7	118.7	118.7	0	0	0	0	0	0	0	0
1195	1996	0	4.3997	0	0	0	0	0	0	0	0	0	1	1	1	0	0	1	2013/12/31	6.2333	6.2333	156.233	156.233	1	1	0	0	1	1	0	0
1196	2005	1	4.3997	0	0	0	0	0	0	0	0	0	0	0	0	0	0	1	2013/12/31	44.7	44.7	44.7	44.7	0	0	0	0	0	0	0	0
1197	1996	0	4.3997	0	0	0	0	0	0	0	0	0	1	1	1	0	0	1	2013/12/31	154.267	154.267	154.267	154.267	0	0	0	0	0	0	0	0
1198	1996	0	4.3997	0	0	0	0	0	1	1	0	0	0	0	0	0	0	0	2013/12/31	154.367	154.367	154.367	154.367	0	0	0	0	0	0	0	0
1199	2005	1	4.3943	0	0	0	0	0	0	0	0	0	0	0	0	0	0	0	2013/12/31	3.4	3.4	48.8	48.8	1	1	0	0	1	1	0	0
1200	2005	0	4.3943	0	0	0	0	0	0	0	0	0	0	0	0	0	0	1	2013/12/31	48.1	48.1	48.1	48.1	0	0	0	0	0	0	0	0
1201	2005	0	4.3943	0	0	0	0	0	0	0	0	0	0	0	0	0	0	0	2013/12/31	48.7667	48.7667	48.7667	48.7667	0	0	0	0	0	0	0	0
1202	2005	1	4.3943	0	0	0	0	0	0	0	0	0	0	0	0	0	0	0	2013/12/31	48.9	48.9	48.9	48.9	0	0	0	0	0	0	0	0
1203	2004	0	4.3943	0	0	0	0	0	1	0	0	1	0	0	0	0	0	1	2013/12/31	61	61	61	61	0	0	0	0	0	0	0	0
1204	1997	1	4.3943	0	0	0	0	0	0	0	0	0	0	0	0	0	0	1	2013/12/31	152	152	152	152	0	0	0	0	0	0	0	0
1205	1996	0	4.3943	0	0	0	0	0	1	0	0	1	0	0	0	0	0	1	2013/12/31	159.4	159.4	159.4	159.4	0	0	0	0	0	0	0	0
1206	2002	0	4.3915	0	0	0	0	0	0	0	0	0	1	1	1	0	0	1	2013/12/31	90.3333	90.3333	90.3333	90.3333	0	0	0	0	0	0	0	0
1207	2006	0	4.3888	0	0	0	0	0	1	1	0	0	0	0	0	0	0	0	2013/12/31	41.8	41.8	41.8	41.8	0	0	0	0	0	0	0	0
1208	2006	0	4.3888	0	0	0	0	0	1	1	0	0	0	0	0	0	0	1	2013/12/31	41.8333	41.8333	41.8333	41.8333	0	0	0	0	0	0	0	0
1209	2000	1	4.3888	1	0	0	0	0	0	0	0	0	0	0	0	0	0	0	2013/12/31	106.667	106.667	106.667	106.667	0	0	0	0	0	0	0	0
1210	2000	0	4.3888	0	0	0	0	0	1	1	0	0	0	0	0	0	0	1	2013/12/31	106.667	106.667	106.667	106.667	0	0	0	0	0	0	0	0
1211	2002	1	4.386	0	0	0	0	0	1	1	0	0	0	0	0	0	0	1	2013/12/31	92.3	92.3	92.3	92.3	0	0	0	0	0	0	0	0
1212	2002	1	4.386	0	0	0	0	0	0	0	0	0	0	0	0	0	0	0	2013/12/31	92.5333	92.5333	92.5333	92.5333	0	0	0	0	0	0	0	0
1213	2006	1	4.3833	0	0	0	0	0	1	1	0	0	0	0	0	0	0	0	2013/12/31	32.7333	32.7333	32.7333	32.7333	0	0	0	0	0	0	0	0
1214	2006	0	4.3833	0	0	0	0	0	0	0	0	0	0	0	0	0	0	1	2013/12/31	32.7667	32.7667	32.7667	32.7667	0	0	0	0	0	0	0	0
1215	2006	1	4.3833	0	0	0	0	0	1	0	0	1	0	0	0	0	0	0	2013/12/31	32.8	32.8	32.8	32.8	0	0	0	0	0	0	0	0
1216	2006	1	4.3833	0	0	0	0	0	0	0	0	0	0	0	0	0	0	0	2013/12/31	32.8	32.8	32.8	32.8	0	0	0	0	0	0	0	0
1217	2005	1	4.3833	0	0	0	0	0	0	0	0	0	0	0	0	0	0	1	2013/12/31	48.7667	48.7667	48.7667	48.7667	0	0	0	0	0	0	0	0
1218	2006	1	4.3806	0	0	0	0	0	1	0	0	1	1	1	1	0	0	1	2013/12/31	35.5	35.5	35.5	35.5	0	0	0	0	0	0	0	0
1219	2006	0	4.3806	0	0	0	0	0	1	0	0	1	0	0	0	0	0	0	2013/12/31	35.9	35.9	35.9	35.9	0	0	0	0	0	0	0	0
1220	2000	1	4.3806	0	0	0	0	0	1	1	0	1	0	0	0	0	0	0	2013/12/31	106.733	106.733	106.733	106.733	0	0	0	0	0	0	0	0
1221	2000	0	4.3806	0	0	0	0	0	0	0	0	0	1	1	1	0	0	1	2013/12/31	106.8	106.8	106.8	106.8	0	0	0	0	0	0	0	0
1222	1997	1	4.3806	0	0	0	0	0	0	0	0	0	0	0	0	0	0	1	2013/12/31	142.167	142.167	142.167	142.167	0	0	0	0	0	0	0	0
1223	2000	1	4.3778	0	0	0	0	0	0	0	0	0	1	1	1	0	0	1	2013/12/31	5.2667	5.2667	108.9	108.9	1	1	0	0	1	1	0	0
1224	2007	1	4.3778	0	0	0	0	0	1	1	1	1	0	0	0	0	0	0	2013/12/31	31.7333	31.7333	31.7333	31.7333	0	0	0	0	0	0	0	0
1225	2007	1	4.3778	0	0	0	0	0	0	0	0	0	0	0	0	0	0	1	2013/12/31	31.7333	31.7333	31.7333	31.7333	0	0	0	0	0	0	0	0
1226	2007	1	4.3778	0	0	0	0	0	1	1	0	0	1	0	0	0	1	0	2013/12/31	31.7667	31.7667	31.7667	31.7667	0	0	0	0	0	0	0	0
1227	2007	1	4.3778	0	0	0	0	0	0	0	0	0	0	0	0	0	0	0	2013/12/31	31.7667	31.7667	31.7667	31.7667	0	0	0	0	0	0	0	0
1228	2007	0	4.3778	0	0	0	0	0	0	0	0	0	0	0	0	0	0	0	2013/12/31	31.8333	31.8333	31.8333	31.8333	0	0	0	0	0	0	0	0
1229	2000	0	4.3778	0	0	0	0	0	1	1	0	0	0	0	0	0	0	0	2013/12/31	108.833	108.833	108.833	108.833	0	0	0	0	0	0	0	0
1230	2000	0	4.3778	0	0	0	0	0	0	0	0	0	1	1	1	0	0	0	2013/12/31	108.933	108.933	108.933	108.933	0	0	0	0	0	0	0	0
1231	1999	1	4.3778	0	0	0	0	0	0	0	0	0	0	0	0	0	0	1	2013/12/31	119.867	119.867	119.867	119.867	0	0	0	0	0	0	0	0
1232	1998	1	4.3778	0	0	0	0	0	0	0	0	0	0	0	0	0	0	0	2013/12/31	135.133	135.133	135.133	135.133	0	0	0	0	0	0	0	0
1233	1998	1	4.3778	0	0	0	0	0	0	0	0	0	1	1	1	0	0	1	2013/12/31	135.133	135.133	135.133	135.133	0	0	0	0	0	0	0	0
1234	1998	1	4.3778	0	0	0	0	0	1	1	0	1	0	0	0	0	0	1	2013/12/31	136.333	136.333	136.333	136.333	0	0	0	0	0	0	0	0
1235	1998	0	4.3778	0	0	0	0	0	0	0	0	0	0	0	0	0	0	0	2013/12/31	136.4	136.4	136.4	136.4	0	0	0	0	0	0	0	0
1236	2007	1	4.3751	0	0	1	0	0	1	1	1	0	0	0	0	0	0	1	2013/12/31	31	31	31	31	0	0	0	0	0	0	0	0
1237	2007	1	4.3751	0	0	0	0	0	0	0	0	0	0	0	0	0	0	0	2013/12/31	31.7667	31.7667	31.7667	31.7667	0	0	0	0	0	0	0	0
1238	2007	1	4.3696	0	0	0	0	0	1	1	0	1	0	0	0	0	0	0	2013/12/31	30.6	30.6	30.6	30.6	0	0	0	0	0	0	0	0
1239	2007	1	4.3696	0	0	0	0	0	0	0	0	0	0	0	0	0	0	1	2013/12/31	30.8333	30.8333	30.8333	30.8333	0	0	0	0	0	0	0	0
1240	2005	0	4.3669	0	0	0	0	0	0	0	0	0	1	0	0	0	1	1	2013/12/31	46.8	46.8	46.8	46.8	0	0	0	0	0	0	0	0
1241	2001	1	4.3641	0	0	0	0	0	0	0	0	0	0	0	0	0	0	0	2013/12/31	10.2	95.7	95.7	10.2	1	0	0	1	1	0	0	1
1242	2001	0	4.3641	0	0	0	0	0	1	0	1	0	1	1	0	1	0	1	2013/12/31	95.8333	95.8333	95.8333	95.8333	0	0	0	0	0	0	0	0
1243	2001	0	4.3641	0	0	0	0	0	0	0	0	0	0	0	0	0	0	0	2013/12/31	95.9	95.9	95.9	95.9	0	0	0	0	0	0	0	0
1244	2000	1	4.3641	0	0	0	0	0	0	0	0	0	0	0	0	0	0	1	2013/12/31	107.9	107.9	107.9	107.9	0	0	0	0	0	0	0	0
1245	1998	1	4.3641	0	0	0	0	0	1	0	0	1	0	0	0	0	0	1	2013/12/31	135.333	135.333	135.333	135.333	0	0	0	0	0	0	0	0
1246	1998	1	4.3641	0	0	0	0	0	1	1	0	0	0	0	0	0	0	1	2013/12/31	136.767	136.767	136.767	136.767	0	0	0	0	0	0	0	0
1247	1998	0	4.3641	0	0	0	0	0	0	0	0	0	0	0	0	0	0	0	2013/12/31	137.6	137.6	137.6	137.6	0	0	0	0	0	0	0	0
1248	1997	1	4.3641	0	0	0	0	0	0	0	0	0	0	0	0	0	0	1	2013/12/31	143.5	143.5	143.5	143.5	0	0	0	0	0	0	0	0
1249	1997	0	4.3641	0	0	0	0	0	0	0	0	0	0	0	0	0	0	0	2013/12/31	143.533	143.533	143.533	143.533	0	0	0	0	0	0	0	0
1250	1997	1	4.3641	0	0	0	0	0	1	0	0	1	0	0	0	0	0	1	2013/12/31	146.567	146.567	146.567	146.567	0	0	0	0	0	0	0	0
1251	1997	0	4.3641	0	0	0	0	0	0	0	0	0	1	1	1	0	0	0	2013/12/31	146.633	146.633	146.633	146.633	0	0	0	0	0	0	0	0
1252	1997	0	4.3641	0	0	0	0	0	0	0	0	0	0	0	0	0	0	0	2013/12/31	146.633	146.633	146.633	146.633	0	0	0	0	0	0	0	0
1253	1997	1	4.3641	0	0	0	0	0	0	0	0	0	0	0	0	0	0	1	2013/12/31	152.467	152.467	152.467	152.467	0	0	0	0	0	0	0	0
1254	1997	1	4.3641	0	0	0	0	0	1	1	0	0	0	0	0	0	0	0	2013/12/31	152.667	152.667	152.667	152.667	0	0	0	0	0	0	0	0
1255	2004	0	4.3614	0	0	0	0	0	0	0	0	0	0	0	0	0	0	1	2013/12/31	4.3333	4.3333	4.3333	62.4667	1	1	1	0	1	1	1	0
1256	2003	1	4.3614	0	0	0	0	0	0	0	0	0	0	0	0	0	0	1	2013/12/31	77.6667	77.6667	77.6667	77.6667	0	0	0	0	0	0	0	0
1257	2006	0	4.3587	0	0	0	0	0	1	0	0	1	1	1	1	0	0	1	2013/12/31	7.9667	7.9667	32.7333	32.7333	1	1	0	0	1	1	0	0
1258	2006	1	4.3587	0	0	0	0	0	0	0	0	0	0	0	0	0	0	0	2013/12/31	33.1	33.1	33.1	33.1	0	0	0	0	0	0	0	0
1259	1998	1	4.3587	0	0	0	0	0	0	0	0	0	0	0	0	0	0	1	2013/12/31	131.433	131.433	131.433	131.433	0	0	0	0	0	0	0	0
1260	1998	1	4.3587	0	0	0	0	0	1	0	0	1	1	0	0	0	1	0	2013/12/31	131.467	131.467	131.467	131.467	0	0	0	0	0	0	0	0
1261	2005	1	4.3532	0	0	0	0	0	1	1	1	1	1	0	0	0	1	1	2013/12/31	52.3667	52.3667	52.3667	52.3667	0	0	0	0	0	0	0	0
1262	2005	0	4.3532	0	0	1	0	0	1	1	1	0	0	0	0	0	0	0	2013/12/31	52.4	52.4	52.4	52.4	0	0	0	0	0	0	0	0
1263	1997	1	4.3504	0	0	1	0	0	0	0	0	0	1	0	0	0	1	0	2013/12/31	4.7333	4.7333	147.833	147.833	1	1	0	0	1	1	0	0
1264	1997	0	4.3504	0	0	0	0	0	1	1	1	0	0	0	0	0	0	0	2013/12/31	9.1333	147.8	147.8	9.1333	1	0	0	1	1	0	0	1
1265	2000	1	4.3504	0	0	0	0	0	0	0	0	0	0	0	0	0	0	0	2013/12/31	11.1	11.1	110.3	110.3	1	1	0	0	1	1	0	0
1266	2005	1	4.3504	0	0	1	0	0	0	0	0	0	0	0	0	0	0	1	2013/12/31	49.2667	49.2667	49.2667	49.2667	0	0	0	0	0	0	0	0
1267	2003	1	4.3504	0	0	0	0	0	0	0	0	0	0	0	0	0	0	1	2013/12/31	69.7	69.7	69.7	69.7	0	0	0	0	0	0	0	0
1268	2000	0	4.3504	0	0	0	0	0	0	0	0	0	0	0	0	0	0	1	2013/12/31	110.2	110.2	110.2	110.2	0	0	0	0	0	0	0	0
1269	2000	0	4.3504	0	0	0	0	0	1	1	0	0	0	0	0	0	0	0	2013/12/31	110.333	110.333	110.333	110.333	0	0	0	0	0	0	0	0
1270	1997	0	4.3504	0	0	0	0	0	0	0	0	0	0	0	0	0	0	1	2013/12/31	147.8	147.8	147.8	147.8	0	0	0	0	0	0	0	0
1271	1997	1	4.3504	0	0	1	0	0	1	1	0	0	1	1	1	0	0	0	2013/12/31	147.833	147.833	147.833	147.833	0	0	0	0	0	0	0	0
1272	1996	1	4.3504	0	0	0	0	0	0	0	0	0	1	0	0	0	1	0	2013/12/31	161	161	161	161	0	0	0	0	0	0	0	0
1273	1996	1	4.3504	0	0	0	0	0	1	1	1	0	1	1	0	1	0	1	2013/12/31	161	161	161	161	0	0	0	0	0	0	0	0
1274	1999	1	4.3477	0	0	0	0	0	1	1	0	1	0	0	0	0	0	1	2013/12/31	9.3333	9.3333	113.2	113.2	1	1	0	0	1	1	0	0
1275	1999	1	4.3477	0	0	0	0	0	0	0	0	0	0	0	0	0	0	1	2013/12/31	11.7667	11.7667	11.7667	118.333	1	1	1	0	1	1	1	0
1276	1999	1	4.3477	0	0	0	0	0	0	0	0	0	1	1	0	1	0	0	2013/12/31	118.4	118.4	118.4	118.4	0	0	0	0	0	0	0	0
1277	1999	0	4.3477	0	0	0	0	0	0	0	0	0	0	0	0	0	0	0	2013/12/31	118.467	118.467	118.467	118.467	0	0	0	0	0	0	0	0
1278	2006	1	4.345	0	0	0	0	0	0	0	0	0	0	0	0	0	0	1	2013/12/31	42.2	42.2	42.2	42.2	0	0	0	0	0	0	0	0
1279	2006	1	4.345	0	0	0	0	0	1	0	0	1	0	0	0	0	0	0	2013/12/31	42.3667	42.3667	42.3667	42.3667	0	0	0	0	0	0	0	0
1280	2001	1	4.3422	0	0	0	0	0	1	1	1	0	0	0	0	0	0	0	2013/12/31	2.4	2.4	2.4	105.333	1	1	1	0	1	1	1	0
1281	2008	0	4.3422	0	0	0	0	0	0	0	0	0	1	1	1	0	0	1	2013/12/31	15.7667	15.7667	15.7667	15.7667	0	0	0	0	0	0	0	0
1282	2005	1	4.3422	0	0	0	0	0	0	0	0	0	0	0	0	0	0	1	2013/12/31	56.5667	56.5667	56.5667	56.5667	0	0	0	0	0	0	0	0
1283	2001	1	4.3422	0	0	0	0	0	1	0	1	1	0	0	0	0	0	1	2013/12/31	105.133	105.133	105.133	105.133	0	0	0	0	0	0	0	0
1284	2001	1	4.3422	0	0	0	0	0	0	0	0	0	0	0	0	0	0	0	2013/12/31	105.233	105.233	105.233	105.233	0	0	0	0	0	0	0	0
1285	2001	0	4.3422	0	0	0	0	0	0	0	0	0	0	0	0	0	0	0	2013/12/31	105.233	105.233	105.233	105.233	0	0	0	0	0	0	0	0
1286	1997	1	4.3422	0	0	0	0	0	0	0	0	0	0	0	0	0	0	1	2013/12/31	148.9	148.9	148.9	148.9	0	0	0	0	0	0	0	0
1287	2001	1	4.3395	0	0	0	0	0	0	0	0	0	0	0	0	0	0	1	2013/12/31	96.9667	96.9667	96.9667	96.9667	0	0	0	0	0	0	0	0
1288	2000	0	4.3395	0	0	0	0	0	1	1	1	1	0	0	0	0	0	1	2013/12/31	117.467	117.467	117.467	117.467	0	0	0	0	0	0	0	0
1289	2000	0	4.3395	0	0	0	0	0	0	0	0	0	0	0	0	0	0	0	2013/12/31	117.533	117.533	117.533	117.533	0	0	0	0	0	0	0	0
1290	2000	1	4.3395	0	0	0	0	0	0	0	0	0	0	0	0	0	0	0	2013/12/31	117.533	117.533	117.533	117.533	0	0	0	0	0	0	0	0
1291	1999	0	4.3395	0	0	0	0	0	1	1	0	0	0	0	0	0	0	1	2013/12/31	126.667	126.667	126.667	126.667	0	0	0	0	0	0	0	0
1292	1999	0	4.3395	0	0	0	0	0	0	0	0	0	0	0	0	0	0	0	2013/12/31	126.733	126.733	126.733	126.733	0	0	0	0	0	0	0	0
1293	1998	1	4.3395	0	0	0	0	0	0	0	0	0	1	1	1	0	0	0	2013/12/31	140.9	140.9	140.9	140.9	0	0	0	0	0	0	0	0
1294	2002	0	4.3368	0	0	0	0	0	0	0	0	0	0	0	0	0	0	1	2013/12/31	90.1333	90.1333	90.1333	90.1333	0	0	0	0	0	0	0	0
1295	2001	0	4.3258	0	0	0	0	0	1	0	0	1	0	0	0	0	0	0	2013/12/31	100.367	100.367	100.367	100.367	0	0	0	0	0	0	0	0
1296	2001	0	4.3258	0	0	0	0	0	0	0	0	0	1	1	1	0	0	1	2013/12/31	100.367	100.367	100.367	100.367	0	0	0	0	0	0	0	0
1297	1997	0	4.3258	0	0	0	0	0	0	0	0	0	0	0	0	0	0	1	2013/12/31	151.133	151.133	151.133	151.133	0	0	0	0	0	0	0	0
1298	2000	0	4.3231	0	0	0	0	0	0	0	0	0	0	0	0	0	0	1	2013/12/31	107.367	107.367	107.367	107.367	0	0	0	0	0	0	0	0
1299	2005	0	4.3203	0	0	0	0	0	0	0	0	0	0	0	0	0	0	1	2013/12/31	53.6667	53.6667	53.6667	53.6667	0	0	0	0	0	0	0	0
1300	2001	0	4.3203	0	0	0	0	0	1	1	0	0	1	1	0	1	0	1	2013/12/31	103.5	103.5	103.5	103.5	0	0	0	0	0	0	0	0
1301	2004	1	4.3176	0	0	0	0	0	1	0	0	1	0	0	0	0	0	1	2013/12/31	67	67	67	67	0	0	0	0	0	0	0	0
1302	2002	1	4.3176	0	0	0	0	0	0	0	0	0	1	1	0	1	0	1	2013/12/31	85.1	85.1	85.1	85.1	0	0	0	0	0	0	0	0
1303	2005	1	4.3121	0	0	0	0	0	0	0	0	0	0	0	0	0	0	0	2013/12/31	47.7667	47.7667	47.7667	47.7667	0	0	0	0	0	0	0	0
1304	2005	1	4.3121	0	0	0	0	0	0	0	0	0	0	0	0	0	0	1	2013/12/31	47.8333	47.8333	47.8333	47.8333	0	0	0	0	0	0	0	0
1305	2005	1	4.3121	0	0	0	0	0	0	0	0	0	0	0	0	0	0	1	2013/12/31	49.5667	49.5667	49.5667	49.5667	0	0	0	0	0	0	0	0
1306	2005	0	4.3121	0	0	0	0	0	0	0	0	0	0	0	0	0	0	0	2013/12/31	49.8667	49.8667	49.8667	49.8667	0	0	0	0	0	0	0	0
1307	2003	0	4.3121	0	0	0	0	0	0	0	0	0	0	0	0	0	0	0	2013/12/31	73.1333	73.1333	73.1333	73.1333	0	0	0	0	0	0	0	0
1308	2003	1	4.3121	0	0	0	0	0	0	0	0	0	1	0	0	0	1	1	2013/12/31	73.2667	73.2667	73.2667	73.2667	0	0	0	0	0	0	0	0
1309	2000	1	4.3121	0	0	0	0	0	1	0	0	1	1	1	0	1	1	1	2013/12/31	106.667	106.667	106.667	106.667	0	0	0	0	0	0	0	0
1310	2000	1	4.3121	0	0	1	1	0	1	1	0	0	0	0	0	0	0	0	2013/12/31	106.7	106.7	106.7	106.7	0	0	0	0	0	0	0	0
1311	1997	1	4.3121	0	0	0	0	0	0	0	0	0	0	0	0	0	0	1	2013/12/31	152.067	152.067	152.067	152.067	0	0	0	0	0	0	0	0
1312	1996	0	4.3121	0	0	0	0	0	1	1	0	0	0	0	0	0	0	0	2013/12/31	158.4	158.4	158.4	158.4	0	0	0	0	0	0	0	0
1313	1996	0	4.3121	0	0	0	0	0	0	0	0	0	0	0	0	0	0	1	2013/12/31	158.433	158.433	158.433	158.433	0	0	0	0	0	0	0	0
1314	1996	0	4.3121	0	0	0	0	0	0	0	0	0	0	0	0	0	0	0	2013/12/31	158.467	158.467	158.467	158.467	0	0	0	0	0	0	0	0
1315	2007	0	4.3094	0	0	0	0	0	0	0	0	0	1	1	1	0	0	1	2013/12/31	28.2667	28.2667	28.2667	28.2667	0	0	0	0	0	0	0	0
1316	2007	0	4.3094	0	0	0	0	0	0	0	0	0	0	0	0	0	0	0	2013/12/31	28.6	28.6	28.6	28.6	0	0	0	0	0	0	0	0
1317	1999	0	4.3094	0	0	0	0	0	0	0	0	0	0	0	0	0	0	1	2013/12/31	124.033	124.033	124.033	124.033	0	0	0	0	0	0	0	0
1318	2001	0	4.3066	0	0	0	0	0	0	0	0	0	0	0	0	0	0	1	2013/12/31	99.6333	99.6333	99.6333	99.6333	0	0	0	0	0	0	0	0
1319	2001	1	4.3066	0	0	0	0	0	1	1	1	0	0	0	0	0	0	0	2013/12/31	99.6667	99.6667	99.6667	99.6667	0	0	0	0	0	0	0	0
1320	1999	1	4.3066	0	0	0	0	0	0	0	0	0	1	1	0	1	0	0	2013/12/31	119.9	119.9	119.9	119.9	0	0	0	0	0	0	0	0
1321	1999	1	4.3066	0	0	0	0	0	0	0	0	0	0	0	0	0	0	0	2013/12/31	119.933	119.933	119.933	119.933	0	0	0	0	0	0	0	0
1322	1999	1	4.3066	0	0	0	0	0	0	0	0	0	0	0	0	0	0	0	2013/12/31	119.967	119.967	119.967	119.967	0	0	0	0	0	0	0	0
1323	1999	0	4.3066	0	0	0	0	0	0	0	0	0	0	0	0	0	0	0	2013/12/31	119.967	119.967	119.967	119.967	0	0	0	0	0	0	0	0
1324	1999	1	4.3066	0	0	0	0	0	0	0	0	0	0	0	0	0	0	1	2013/12/31	120.033	120.033	120.033	120.033	0	0	0	0	0	0	0	0
1325	1996	0	4.3066	0	0	0	0	0	0	0	0	0	0	0	0	0	0	1	2013/12/31	156.2	156.2	156.2	156.2	0	0	0	0	0	0	0	0
1326	1996	0	4.3066	0	0	0	0	0	0	0	0	0	1	1	0	1	0	0	2013/12/31	156.333	156.333	156.333	156.333	0	0	0	0	0	0	0	0
1327	1996	1	4.3066	0	0	1	0	0	1	1	0	0	0	0	0	0	0	0	2013/12/31	156.333	156.333	156.333	156.333	0	0	0	0	0	0	0	0
1328	1996	1	4.3066	0	0	0	0	0	0	0	0	0	0	0	0	0	0	0	2013/12/31	156.433	156.433	156.433	156.433	0	0	0	0	0	0	0	0
1329	2003	1	4.3039	0	0	0	0	0	0	0	0	0	0	0	0	0	0	1	2013/12/31	79.4333	79.4333	79.4333	79.4333	0	0	0	0	0	0	0	0
1330	2003	1	4.2984	0	0	0	0	0	0	0	0	0	0	0	0	0	0	1	2013/12/31	78.5	78.5	78.5	78.5	0	0	0	0	0	0	0	0
1331	2003	1	4.293	0	0	1	0	0	1	1	0	0	1	1	1	0	0	0	2013/12/31	6.0333	6.0333	73.3	73.3	1	1	0	0	1	1	0	0
1332	2003	1	4.293	0	0	0	0	0	1	0	1	0	0	0	0	0	0	1	2013/12/31	73.4	73.4	73.4	73.4	0	0	0	0	0	0	0	0
1333	1996	0	4.2875	0	0	0	0	0	1	1	1	1	0	0	0	0	0	0	2013/12/31	166.767	166.767	166.767	166.767	0	0	0	0	0	0	0	0
1334	1996	1	4.2875	0	0	0	0	0	1	1	0	0	0	0	0	0	0	1	2013/12/31	166.767	166.767	166.767	166.767	0	0	0	0	0	0	0	0
1335	1996	0	4.2875	0	0	0	0	0	0	0	0	0	0	0	0	0	0	0	2013/12/31	166.8	166.8	166.8	166.8	0	0	0	0	0	0	0	0
1336	2001	0	4.2847	0	0	0	0	0	0	0	0	0	0	0	0	0	0	1	2013/12/31	4.4333	102.833	102.833	4.4333	1	0	0	1	1	0	0	1
1337	2007	0	4.2847	0	0	0	0	0	1	0	0	1	1	1	1	0	0	0	2013/12/31	6.6333	6.6333	32.9333	32.9333	1	1	0	0	1	1	0	0
1338	2007	1	4.2847	0	0	0	0	0	1	1	1	0	0	0	0	0	0	1	2013/12/31	32.8333	32.8333	32.8333	32.8333	0	0	0	0	0	0	0	0
1339	2007	0	4.2847	0	0	0	0	0	0	0	0	0	0	0	0	0	0	0	2013/12/31	32.9333	32.9333	32.9333	32.9333	0	0	0	0	0	0	0	0
1340	2003	1	4.2847	0	0	1	0	0	0	0	0	0	1	1	1	0	0	0	2013/12/31	71.4333	71.4333	71.4333	71.4333	0	0	0	0	0	0	0	0
1341	2003	1	4.2847	0	0	0	0	0	0	0	0	0	1	1	0	1	1	1	2013/12/31	71.5	71.5	71.5	71.5	0	0	0	0	0	0	0	0
1342	2001	1	4.2847	0	0	0	0	0	0	0	0	0	1	1	1	0	0	0	2013/12/31	102.933	102.933	102.933	102.933	0	0	0	0	0	0	0	0
1343	1996	1	4.2847	0	0	0	0	0	0	0	0	0	0	0	0	0	0	1	2013/12/31	159.6	159.6	159.6	159.6	0	0	0	0	0	0	0	0
1344	1996	1	4.2847	0	0	0	0	0	0	0	0	0	0	0	0	0	0	0	2013/12/31	159.633	159.633	159.633	159.633	0	0	0	0	0	0	0	0
1345	1998	1	4.282	0	0	0	0	0	0	0	0	0	0	0	0	0	0	0	2013/12/31	7.7667	10.5	135.467	7.7667	1	1	0	1	1	1	0	1
1346	2000	1	4.282	0	0	0	0	0	0	0	0	0	1	1	1	0	0	0	2005/10/26	15.5333	15.5333	15.5333	15.5333	0	0	0	0	0	0	0	0
1347	2000	1	4.282	0	0	0	0	0	0	0	0	0	0	0	0	0	0	1	2013/12/31	115.167	115.167	115.167	115.167	0	0	0	0	0	0	0	0
1348	2000	0	4.282	0	0	0	0	0	0	0	0	0	0	0	0	0	0	0	2013/12/31	115.2	115.2	115.2	115.2	0	0	0	0	0	0	0	0
1349	1998	1	4.282	0	0	0	0	0	1	1	1	0	1	1	1	0	0	1	2013/12/31	135.267	135.267	135.267	135.267	0	0	0	0	0	0	0	0
1350	1998	0	4.282	0	0	0	0	0	0	0	0	0	0	0	0	0	0	0	2013/12/31	135.5	135.5	135.5	135.5	0	0	0	0	0	0	0	0
1351	1996	1	4.2793	0	0	0	0	0	1	1	1	0	0	0	0	0	0	1	2013/12/31	9	9	164.5	164.5	1	1	0	0	1	1	0	0
1352	2000	1	4.2793	0	0	0	0	0	0	0	0	0	0	0	0	0	0	0	2013/12/31	111.133	111.133	111.133	111.133	0	0	0	0	0	0	0	0
1353	2007	0	4.2765	0	0	0	0	0	0	0	0	0	0	0	0	0	0	1	2013/12/31	32.9	32.9	32.9	32.9	0	0	0	0	0	0	0	0
1354	2005	1	4.2765	0	0	0	0	0	1	0	0	1	0	0	0	0	0	1	2013/12/31	48.2333	48.2333	48.2333	48.2333	0	0	0	0	0	0	0	0
1355	2004	1	4.2765	0	0	0	0	0	1	1	1	1	0	0	0	0	0	1	2013/12/31	69.2	69.2	69.2	69.2	0	0	0	0	0	0	0	0
1356	1997	1	4.2765	0	0	1	0	0	1	1	0	0	0	0	0	0	0	0	2013/12/31	146.467	146.467	146.467	146.467	0	0	0	0	0	0	0	0
1357	1997	0	4.2765	1	0	0	0	0	0	0	0	0	0	0	0	0	0	0	2013/12/31	146.533	146.533	146.533	146.533	0	0	0	0	0	0	0	0
1358	1997	1	4.2765	0	0	0	0	0	0	0	0	0	0	0	0	0	0	1	2013/12/31	146.567	146.567	146.567	146.567	0	0	0	0	0	0	0	0
1359	1999	0	4.2738	0	1	0	0	0	0	0	0	0	0	0	0	0	0	0	2013/12/31	6.8333	6.8333	130.433	130.433	1	1	0	0	1	1	0	0
1360	2004	1	4.2738	0	0	0	0	0	1	0	0	1	0	0	0	0	0	1	2013/12/31	65.4667	65.4667	65.4667	65.4667	0	0	0	0	0	0	0	0
1361	2001	1	4.2738	0	0	0	0	0	1	0	0	1	1	0	0	0	1	1	2013/12/31	104.933	104.933	104.933	104.933	0	0	0	0	0	0	0	0
1362	2001	1	4.2738	0	0	0	0	0	0	0	0	0	0	0	0	0	0	0	2013/12/31	104.967	104.967	104.967	104.967	0	0	0	0	0	0	0	0
1363	1999	1	4.2738	0	0	0	0	0	1	1	0	0	1	0	0	0	1	1	2013/12/31	130.267	130.267	130.267	130.267	0	0	0	0	0	0	0	0
1364	1996	0	4.2738	0	0	0	0	0	0	0	0	0	0	0	0	0	0	1	2013/12/31	161.2	161.2	161.2	161.2	0	0	0	0	0	0	0	0
1365	2006	1	4.271	0	0	0	0	0	0	0	0	0	0	0	0	0	0	0	2013/12/31	5.4	5.4	38.2	38.2	1	1	0	0	1	1	0	0
1366	1999	0	4.271	0	0	0	0	0	0	0	0	0	0	0	0	0	0	1	2013/12/31	123.233	123.233	123.233	123.233	0	0	0	0	0	0	0	0
1367	2001	1	4.2683	0	0	0	0	0	0	0	0	0	0	0	0	0	0	1	2013/12/31	105.133	105.133	105.133	105.133	0	0	0	0	0	0	0	0
1368	2001	1	4.2683	0	0	0	0	0	1	1	0	0	1	0	0	0	1	0	2013/12/31	105.167	105.167	105.167	105.167	0	0	0	0	0	0	0	0
1369	2001	1	4.2656	0	0	0	0	0	0	0	0	0	0	0	0	0	0	0	2013/12/31	7.2	97	7.2	97	1	0	1	0	1	0	1	0
1370	2001	1	4.2656	0	0	0	0	0	1	1	0	0	0	0	0	0	0	1	2013/12/31	96.9667	96.9667	96.9667	96.9667	0	0	0	0	0	0	0	0
1371	1998	1	4.2656	0	0	0	0	0	0	0	0	0	0	0	0	0	0	0	2013/12/31	142.7	142.7	142.7	142.7	0	0	0	0	0	0	0	0
1372	1998	0	4.2656	0	0	0	0	0	0	0	0	0	0	0	0	0	0	1	2013/12/31	142.733	142.733	142.733	142.733	0	0	0	0	0	0	0	0
1373	2001	1	4.2628	0	0	0	0	0	1	0	0	1	1	0	0	0	1	1	2013/12/31	106.067	106.067	106.067	106.067	0	0	0	0	0	0	0	0
1374	1998	1	4.2601	0	0	0	0	0	0	0	0	0	1	1	1	0	0	1	2013/12/31	142.7	142.7	142.7	142.7	0	0	0	0	0	0	0	0
1375	1998	0	4.2601	0	0	0	0	0	0	0	0	0	1	1	1	0	0	0	2013/12/31	142.767	142.767	142.767	142.767	0	0	0	0	0	0	0	0
1376	1998	1	4.2601	0	0	0	0	0	0	0	0	0	0	0	0	0	0	0	2013/12/31	142.833	142.833	142.833	142.833	0	0	0	0	0	0	0	0
1377	1996	0	4.2601	0	0	0	0	0	1	1	1	0	1	1	0	1	0	1	2013/12/31	158.1	158.1	158.1	158.1	0	0	0	0	0	0	0	0
1378	2004	0	4.2574	0	0	1	0	0	1	1	0	0	1	1	1	0	0	0	2013/12/31	3.2667	3.2667	68.7333	68.7333	1	1	0	0	1	1	0	0
1379	2008	1	4.2546	0	0	0	0	0	0	0	0	0	0	0	0	0	0	1	2013/12/31	13.9667	13.9667	13.9667	13.9667	0	0	0	0	0	0	0	0
1380	2003	0	4.2546	0	0	0	0	0	0	0	0	0	0	0	0	0	0	1	2013/12/31	81.9	81.9	81.9	81.9	0	0	0	0	0	0	0	0
1381	1996	0	4.2519	0	0	0	0	0	0	0	0	0	0	0	0	0	0	1	2013/12/31	166.233	166.233	166.233	166.233	0	0	0	0	0	0	0	0
1382	1996	1	4.2519	0	0	0	0	0	0	0	0	0	0	0	0	0	0	0	2013/12/31	166.233	166.233	166.233	166.233	0	0	0	0	0	0	0	0
1383	2005	1	4.2491	0	0	0	0	0	0	0	0	0	0	0	0	0	0	0	2009/09/27	4.7333	4.7333	4.7333	4.7333	0	0	0	0	0	0	0	0
1384	2003	1	4.2491	0	0	0	1	0	0	0	0	0	0	0	0	0	0	0	2013/12/31	9.6667	9.6667	80.0667	80.0667	1	1	0	0	1	1	0	0
1385	2005	1	4.2491	0	0	0	0	0	0	0	0	0	0	0	0	0	0	0	2013/12/31	56.6667	56.6667	56.6667	56.6667	0	0	0	0	0	0	0	0
1386	2005	1	4.2491	0	0	0	0	0	0	0	0	0	0	0	0	0	0	1	2013/12/31	56.6667	56.6667	56.6667	56.6667	0	0	0	0	0	0	0	0
1387	2003	1	4.2491	0	0	0	0	0	1	1	1	0	0	0	0	0	0	1	2013/12/31	79.9333	79.9333	79.9333	79.9333	0	0	0	0	0	0	0	0
1388	2003	1	4.2491	0	0	0	0	0	0	0	0	0	0	0	0	0	0	0	2013/12/31	80.1333	80.1333	80.1333	80.1333	0	0	0	0	0	0	0	0
1389	2003	0	4.2491	0	0	0	0	0	0	0	0	0	0	0	0	0	0	0	2013/12/31	80.1667	80.1667	80.1667	80.1667	0	0	0	0	0	0	0	0
1390	2004	0	4.2464	0	0	0	0	0	0	0	0	0	0	0	0	0	0	1	2013/12/31	11.1333	11.1333	61.5	61.5	1	1	0	0	1	1	0	0
1391	2003	0	4.2464	0	0	0	0	0	0	0	0	0	0	0	0	0	0	1	2013/12/31	79.7333	79.7333	79.7333	79.7333	0	0	0	0	0	0	0	0
1392	2003	0	4.2464	0	0	0	0	0	0	0	0	0	0	0	0	0	0	1	2013/12/31	81.0333	81.0333	81.0333	81.0333	0	0	0	0	0	0	0	0
1393	2003	1	4.2437	0	0	0	0	0	0	0	0	0	0	0	0	0	0	1	2013/12/31	81.8333	81.8333	81.8333	81.8333	0	0	0	0	0	0	0	0
1394	2002	0	4.2409	0	0	0	0	0	0	0	0	0	0	0	0	0	0	1	2013/12/31	93.1667	93.1667	93.1667	93.1667	0	0	0	0	0	0	0	0
1395	2001	1	4.2409	1	0	0	0	0	1	0	0	1	0	0	0	0	0	1	2013/12/31	98.4	98.4	98.4	98.4	0	0	0	0	0	0	0	0
1396	1998	1	4.2409	0	0	1	0	0	0	0	0	0	0	0	0	0	0	1	2013/12/31	132.8	132.8	132.8	132.8	0	0	0	0	0	0	0	0
1397	1998	1	4.2409	0	0	0	0	0	1	0	1	0	0	0	0	0	0	1	2013/12/31	141.067	141.067	141.067	141.067	0	0	0	0	0	0	0	0
1398	1996	1	4.2409	0	0	0	0	0	0	0	0	0	1	1	0	1	0	0	2013/12/31	159.233	159.233	159.233	159.233	0	0	0	0	0	0	0	0
1399	1996	1	4.2409	0	0	0	0	0	0	0	0	0	0	0	0	0	0	0	2013/12/31	159.3	159.3	159.3	159.3	0	0	0	0	0	0	0	0
1400	1996	0	4.2409	0	0	0	0	0	0	0	0	0	0	0	0	0	0	1	2013/12/31	159.333	159.333	159.333	159.333	0	0	0	0	0	0	0	0
1401	2007	0	4.2382	0	0	1	1	0	1	1	0	0	1	1	1	0	0	0	2013/12/31	7.8	7.8	27.4333	27.4333	1	1	0	0	1	1	0	0
1402	2007	0	4.2382	0	0	0	0	0	0	0	0	0	0	0	0	0	0	1	2013/12/31	27.3667	27.3667	27.3667	27.3667	0	0	0	0	0	0	0	0
1403	2008	1	4.2355	0	0	0	0	0	0	0	0	0	0	0	0	0	0	1	2013/12/31	15.2	15.2	15.2	15.2	0	0	0	0	0	0	0	0
1404	2008	0	4.2355	0	0	0	0	0	0	0	0	0	0	0	0	0	0	0	2013/12/31	15.2	15.2	15.2	15.2	0	0	0	0	0	0	0	0
1405	2008	0	4.2355	0	0	0	0	0	0	0	0	0	0	0	0	0	0	0	2013/12/31	15.3333	15.3333	15.3333	15.3333	0	0	0	0	0	0	0	0
1406	2005	1	4.2355	0	0	0	0	0	0	0	0	0	1	1	1	0	0	1	2013/12/31	50.6	50.6	50.6	50.6	0	0	0	0	0	0	0	0
1407	2001	1	4.2355	0	0	0	0	0	1	1	0	0	0	0	0	0	0	1	2013/12/31	96.3667	96.3667	96.3667	96.3667	0	0	0	0	0	0	0	0
1408	1997	0	4.2355	0	0	0	0	0	0	0	0	0	0	0	0	0	0	0	2013/12/31	151.2	151.2	151.2	151.2	0	0	0	0	0	0	0	0
1409	1997	1	4.2355	0	0	0	0	0	0	0	0	0	0	0	0	0	0	0	2013/12/31	151.233	151.233	151.233	151.233	0	0	0	0	0	0	0	0
1410	1997	1	4.2355	0	0	0	0	0	1	0	0	1	0	0	0	0	0	1	2013/12/31	151.233	151.233	151.233	151.233	0	0	0	0	0	0	0	0
1411	1997	1	4.2355	0	0	1	0	0	1	1	0	1	1	1	1	0	0	1	2013/12/31	153.167	153.167	153.167	153.167	0	0	0	0	0	0	0	0
1412	1997	0	4.2355	0	0	0	0	0	0	0	0	0	0	0	0	0	0	0	2013/12/31	153.333	153.333	153.333	153.333	0	0	0	0	0	0	0	0
1413	2004	1	4.2327	0	0	0	0	0	1	1	0	0	1	0	0	0	1	1	2013/12/31	61.8667	61.8667	61.8667	61.8667	0	0	0	0	0	0	0	0
1414	2004	1	4.2327	0	0	0	0	0	0	0	0	0	1	1	1	0	0	0	2013/12/31	61.9333	61.9333	61.9333	61.9333	0	0	0	0	0	0	0	0
1415	2004	0	4.2327	0	0	0	0	0	0	0	0	0	0	0	0	0	0	0	2013/12/31	61.9333	61.9333	61.9333	61.9333	0	0	0	0	0	0	0	0
1416	2004	1	4.2327	0	0	0	0	0	1	1	0	0	0	0	0	0	0	0	2013/12/31	61.9667	61.9667	61.9667	61.9667	0	0	0	0	0	0	0	0
1417	2004	1	4.2272	0	0	0	0	0	1	1	0	0	1	0	0	0	1	0	2013/12/31	68.1667	68.1667	68.1667	68.1667	0	0	0	0	0	0	0	0
1418	2004	0	4.2272	0	0	0	0	0	0	0	0	0	0	0	0	0	0	1	2013/12/31	68.2	68.2	68.2	68.2	0	0	0	0	0	0	0	0
1419	2004	0	4.2272	0	0	0	0	0	1	1	0	0	0	0	0	0	0	0	2013/12/31	68.2333	68.2333	68.2333	68.2333	0	0	0	0	0	0	0	0
1420	1997	1	4.2272	0	0	0	0	0	1	1	0	0	0	0	0	0	0	1	2013/12/31	155.333	155.333	155.333	155.333	0	0	0	0	0	0	0	0
1421	2007	1	4.2245	0	0	0	0	0	1	1	1	0	0	0	0	0	0	1	2013/12/31	30.6667	30.6667	30.6667	30.6667	0	0	0	0	0	0	0	0
1422	1998	1	4.2245	0	0	0	0	0	1	0	0	1	0	0	0	0	0	1	2013/12/31	139.033	139.033	139.033	139.033	0	0	0	0	0	0	0	0
1423	1997	1	4.2218	0	0	0	0	0	1	1	1	0	1	0	0	0	1	1	2013/12/31	146.333	146.333	146.333	146.333	0	0	0	0	0	0	0	0
1424	1997	1	4.2218	0	0	0	0	0	0	0	0	0	0	0	0	0	0	0	2013/12/31	146.367	146.367	146.367	146.367	0	0	0	0	0	0	0	0
1425	2000	0	4.219	0	0	0	0	0	1	1	1	0	0	0	0	0	0	0	2013/12/31	115.867	115.867	115.867	115.867	0	0	0	0	0	0	0	0
1426	2000	1	4.219	0	0	0	0	0	0	0	0	0	0	0	0	0	0	1	2013/12/31	115.867	115.867	115.867	115.867	0	0	0	0	0	0	0	0
1427	1996	1	4.219	0	0	0	0	0	0	0	0	0	0	0	0	0	0	1	2013/12/31	164.6	164.6	164.6	164.6	0	0	0	0	0	0	0	0
1428	1996	1	4.219	0	0	0	0	0	1	1	0	0	0	0	0	0	0	0	2013/12/31	164.633	164.633	164.633	164.633	0	0	0	0	0	0	0	0
1429	2000	0	4.2136	0	0	0	0	0	0	0	0	0	0	0	0	0	0	0	2013/12/31	110.933	110.933	110.933	110.933	0	0	0	0	0	0	0	0
1430	2000	0	4.2136	0	0	0	0	0	0	0	0	0	0	0	0	0	0	0	2013/12/31	110.933	110.933	110.933	110.933	0	0	0	0	0	0	0	0
1431	2000	0	4.2136	0	0	0	0	0	0	0	0	0	0	0	0	0	0	1	2013/12/31	110.967	110.967	110.967	110.967	0	0	0	0	0	0	0	0
1432	1999	0	4.2136	0	0	0	0	0	1	1	0	0	0	0	0	0	0	1	2013/12/31	129.233	129.233	129.233	129.233	0	0	0	0	0	0	0	0
1433	1996	1	4.2108	0	0	1	0	0	1	1	0	0	0	0	0	0	0	0	2013/12/31	5.1333	5.1333	156.567	156.567	1	1	0	0	1	1	0	0
1434	2007	1	4.2108	0	0	0	0	0	0	0	0	0	0	0	0	0	0	1	2013/12/31	9.8667	9.8667	9.8667	25.6667	1	1	1	0	1	1	1	0
1435	1999	0	4.2108	0	0	0	0	0	0	0	0	0	0	0	0	0	0	1	2013/12/31	120	120	120	120	0	0	0	0	0	0	0	0
1436	1996	1	4.2108	0	0	0	0	0	0	0	0	0	0	0	0	0	0	0	2013/12/31	156.567	156.567	156.567	156.567	0	0	0	0	0	0	0	0
1437	1996	1	4.2108	0	0	0	0	0	0	0	0	0	0	0	0	0	0	1	2013/12/31	156.567	156.567	156.567	156.567	0	0	0	0	0	0	0	0
1438	1996	1	4.2108	0	0	0	0	0	0	0	0	0	0	0	0	0	0	0	2013/12/31	156.7	156.7	156.7	156.7	0	0	0	0	0	0	0	0
1439	2000	1	4.2081	0	0	0	0	0	0	0	0	0	1	1	1	0	0	0	2013/12/31	114.933	114.933	114.933	114.933	0	0	0	0	0	0	0	0
1440	2000	1	4.2081	0	0	0	0	0	0	0	0	0	0	0	0	0	0	1	2013/12/31	115.067	115.067	115.067	115.067	0	0	0	0	0	0	0	0
1441	2007	0	4.2026	0	0	1	0	0	1	1	0	0	0	0	0	0	0	1	2013/12/31	9.8	9.8	22.6333	22.6333	1	1	0	0	1	1	0	0
1442	2007	1	4.2026	0	0	0	0	0	1	1	1	0	1	0	0	0	1	0	2013/12/31	22.8333	22.8333	22.8333	22.8333	0	0	0	0	0	0	0	0
1443	2007	0	4.2026	0	0	0	0	0	0	0	0	0	0	0	0	0	0	0	2013/12/31	22.8333	22.8333	22.8333	22.8333	0	0	0	0	0	0	0	0
1444	2002	1	4.2026	0	0	0	0	0	1	0	1	1	0	0	0	0	0	1	2013/12/31	87.7	87.7	87.7	87.7	0	0	0	0	0	0	0	0
1445	1998	1	4.1999	0	0	0	0	0	0	0	0	0	0	0	0	0	0	1	2013/12/31	139.4	139.4	139.4	139.4	0	0	0	0	0	0	0	0
1446	1996	0	4.1999	0	0	0	0	0	0	0	0	0	0	0	0	0	0	0	2013/12/31	163.367	163.367	163.367	163.367	0	0	0	0	0	0	0	0
1447	1996	1	4.1999	0	0	0	0	0	0	0	0	0	0	0	0	0	0	1	2013/12/31	163.9	163.9	163.9	163.9	0	0	0	0	0	0	0	0
1448	2000	1	4.1971	0	0	0	0	0	1	1	0	0	1	1	1	0	0	1	2013/12/31	112	112	112	112	0	0	0	0	0	0	0	0
1449	1998	0	4.1944	1	0	0	0	0	1	1	0	0	1	1	1	0	0	0	2013/12/31	142.433	142.433	142.433	142.433	0	0	0	0	0	0	0	0
1450	1998	1	4.1944	0	0	0	0	0	0	0	0	0	0	0	0	0	0	1	2013/12/31	142.5	142.5	142.5	142.5	0	0	0	0	0	0	0	0
1451	2007	1	4.1916	0	0	1	0	0	1	1	0	1	1	1	1	0	0	1	2013/12/31	22.9333	22.9333	22.9333	22.9333	0	0	0	0	0	0	0	0
1452	1997	0	4.1916	0	0	0	0	0	1	1	1	0	0	0	0	0	0	0	2013/12/31	151.767	151.767	151.767	151.767	0	0	0	0	0	0	0	0
1453	1997	1	4.1916	0	0	0	0	0	0	0	0	0	0	0	0	0	0	1	2013/12/31	151.767	151.767	151.767	151.767	0	0	0	0	0	0	0	0
1454	1999	1	4.1889	0	0	0	0	0	0	0	0	0	0	0	0	0	0	0	2013/12/31	120.233	120.233	120.233	120.233	0	0	0	0	0	0	0	0
1455	1998	0	4.1889	0	0	0	0	0	0	0	0	0	0	0	0	0	0	1	2013/12/31	138.6	138.6	138.6	138.6	0	0	0	0	0	0	0	0
1456	1996	0	4.1889	0	0	0	0	0	0	0	0	0	0	0	0	0	0	1	2013/12/31	164.9	164.9	164.9	164.9	0	0	0	0	0	0	0	0
1457	1996	1	4.1889	0	0	0	0	0	0	0	0	0	0	0	0	0	0	0	2013/12/31	164.967	164.967	164.967	164.967	0	0	0	0	0	0	0	0
1458	1996	0	4.1889	0	0	1	0	0	1	1	0	0	0	0	0	0	0	0	2013/12/31	165.067	165.067	165.067	165.067	0	0	0	0	0	0	0	0
1459	2000	0	4.1862	0	0	0	0	0	0	0	0	0	0	0	0	0	0	1	2013/12/31	116.3	116.3	116.3	116.3	0	0	0	0	0	0	0	0
1460	1997	1	4.1862	0	0	0	0	0	0	0	0	0	0	0	0	0	0	1	2013/12/31	148.533	148.533	148.533	148.533	0	0	0	0	0	0	0	0
1461	1997	1	4.1862	0	0	0	0	0	0	0	0	0	0	0	0	0	0	0	2013/12/31	148.8	148.8	148.8	148.8	0	0	0	0	0	0	0	0
1462	1997	0	4.1862	0	0	0	0	0	0	0	0	0	0	0	0	0	0	0	2013/12/31	148.9	148.9	148.9	148.9	0	0	0	0	0	0	0	0
1463	2006	0	4.1834	0	0	0	0	0	1	0	1	0	0	0	0	0	0	1	2013/12/31	44.1	44.1	44.1	44.1	0	0	0	0	0	0	0	0
1464	2006	0	4.1834	0	0	0	0	0	0	0	0	0	0	0	0	0	0	0	2013/12/31	44.4	44.4	44.4	44.4	0	0	0	0	0	0	0	0
1465	2002	0	4.1834	0	0	0	0	0	0	0	0	0	0	0	0	0	0	0	2013/12/31	95.0333	95.0333	95.0333	95.0333	0	0	0	0	0	0	0	0
1466	1998	0	4.1834	0	0	0	0	0	1	1	1	1	0	0	0	0	0	1	2013/12/31	134.6	134.6	134.6	134.6	0	0	0	0	0	0	0	0
1467	2006	1	4.1807	0	0	0	0	0	1	1	0	1	0	0	0	0	0	0	2013/12/31	2.7	2.7	41.2667	41.2667	1	1	0	0	1	1	0	0
1468	2003	1	4.1807	0	0	0	0	0	1	1	0	1	0	0	0	0	0	0	2013/12/31	6.2333	6.2333	71.6667	71.6667	1	1	0	0	1	1	0	0
1469	2008	1	4.1807	0	0	0	0	0	0	0	0	0	1	0	0	0	1	1	2013/12/31	22	22	22	22	0	0	0	0	0	0	0	0
1470	2006	0	4.1807	0	0	0	0	0	0	0	0	0	1	1	1	0	0	1	2013/12/31	41.3	41.3	41.3	41.3	0	0	0	0	0	0	0	0
1471	2003	1	4.1807	0	0	0	0	0	0	0	0	0	0	0	0	0	0	1	2013/12/31	71.4333	71.4333	71.4333	71.4333	0	0	0	0	0	0	0	0
1472	2003	1	4.1807	0	0	0	0	0	1	1	0	0	0	0	0	0	0	0	2013/12/31	71.8333	71.8333	71.8333	71.8333	0	0	0	0	0	0	0	0
1473	1999	0	4.1807	0	0	0	0	0	0	0	0	0	0	0	0	0	0	0	2013/12/31	131.567	131.567	131.567	131.567	0	0	0	0	0	0	0	0
1474	1999	0	4.1807	0	0	0	0	0	0	0	0	0	0	0	0	0	0	1	2013/12/31	131.567	131.567	131.567	131.567	0	0	0	0	0	0	0	0
1475	1999	1	4.1807	0	0	0	0	0	0	0	0	0	0	0	0	0	0	0	2013/12/31	131.633	131.633	131.633	131.633	0	0	0	0	0	0	0	0
1476	1996	1	4.1807	0	0	0	0	0	0	0	0	0	0	0	0	0	0	1	2013/12/31	167.067	167.067	167.067	167.067	0	0	0	0	0	0	0	0
1477	1997	1	4.178	0	0	1	0	0	1	0	0	1	1	0	0	0	1	1	2013/12/31	144.7	144.7	144.7	144.7	0	0	0	0	0	0	0	0
1478	2002	1	4.1752	0	0	0	0	0	0	0	0	0	0	0	0	0	0	1	2013/12/31	85.9667	85.9667	85.9667	85.9667	0	0	0	0	0	0	0	0
1479	2002	0	4.1752	0	0	0	0	0	0	0	0	0	0	0	0	0	0	0	2013/12/31	86.1333	86.1333	86.1333	86.1333	0	0	0	0	0	0	0	0
1480	1996	1	4.1752	0	0	0	0	0	0	0	0	0	0	0	0	0	0	1	2013/12/31	165.933	165.933	165.933	165.933	0	0	0	0	0	0	0	0
1481	1996	1	4.1752	0	0	0	0	0	0	0	0	0	0	0	0	0	0	1	2013/12/31	167.1	167.1	167.1	167.1	0	0	0	0	0	0	0	0
1482	2003	1	4.1725	0	0	0	0	0	1	1	0	0	1	1	1	0	0	1	2013/12/31	73.8	73.8	73.8	73.8	0	0	0	0	0	0	0	0
1483	2000	1	4.1725	0	0	0	0	0	0	0	0	0	0	0	0	0	0	1	2013/12/31	109.3	109.3	109.3	109.3	0	0	0	0	0	0	0	0
1484	2000	1	4.1697	0	0	0	0	0	1	1	0	0	0	0	0	0	0	1	2013/12/31	118.267	118.267	118.267	118.267	0	0	0	0	0	0	0	0
1485	1998	1	4.1697	0	0	0	0	0	0	0	0	0	0	0	0	0	0	1	2013/12/31	139.933	139.933	139.933	139.933	0	0	0	0	0	0	0	0
1486	1999	1	4.167	0	0	0	0	0	1	0	0	1	0	0	0	0	0	1	2013/12/31	131.767	131.767	131.767	131.767	0	0	0	0	0	0	0	0
1487	2005	0	4.1643	0	0	0	0	0	0	0	0	0	1	1	1	0	0	1	2013/12/31	55.4333	55.4333	55.4333	55.4333	0	0	0	0	0	0	0	0
1488	2001	1	4.1643	0	0	0	0	0	0	0	0	0	0	0	0	0	0	1	2013/12/31	103.2	103.2	103.2	103.2	0	0	0	0	0	0	0	0
1489	2001	1	4.1643	0	0	0	0	0	1	1	0	0	0	0	0	0	0	0	2013/12/31	103.433	103.433	103.433	103.433	0	0	0	0	0	0	0	0
1490	1998	0	4.1643	0	0	0	0	0	0	0	0	0	0	0	0	0	0	1	2013/12/31	142.9	142.9	142.9	142.9	0	0	0	0	0	0	0	0
1491	2006	0	4.1615	0	0	0	0	0	0	0	0	0	1	1	1	0	0	1	2013/12/31	45.6	45.6	45.6	45.6	0	0	0	0	0	0	0	0
1492	1998	0	4.1615	0	0	0	0	0	0	0	0	0	1	0	0	0	1	1	2013/12/31	132.767	132.767	132.767	132.767	0	0	0	0	0	0	0	0
1493	1998	1	4.1615	0	0	0	0	0	0	0	0	0	0	0	0	0	0	0	2013/12/31	132.9	132.9	132.9	132.9	0	0	0	0	0	0	0	0
1494	1999	0	4.1588	0	0	0	0	0	0	0	0	0	0	0	0	0	0	1	2013/12/31	127.733	127.733	127.733	127.733	0	0	0	0	0	0	0	0
1495	1999	1	4.1588	0	0	1	0	0	1	1	0	1	1	1	1	0	0	1	2013/12/31	129.833	129.833	129.833	129.833	0	0	0	0	0	0	0	0
1496	1999	0	4.1588	0	0	0	0	0	0	0	0	0	0	0	0	0	0	0	2013/12/31	129.867	129.867	129.867	129.867	0	0	0	0	0	0	0	0
1497	1999	1	4.1588	0	0	0	0	0	1	1	1	1	0	0	0	0	0	0	2013/12/31	130.467	130.467	130.467	130.467	0	0	0	0	0	0	0	0
1498	1999	1	4.1588	0	0	0	0	0	1	1	0	1	0	0	0	0	0	0	2013/12/31	130.667	130.667	130.667	130.667	0	0	0	0	0	0	0	0
1499	1999	0	4.1588	0	0	1	0	0	1	1	0	0	1	1	0	1	0	1	2013/12/31	130.7	130.7	130.7	130.7	0	0	0	0	0	0	0	0
1500	1999	1	4.1588	0	0	0	0	0	0	0	0	0	0	0	0	0	0	0	2013/12/31	130.9	130.9	130.9	130.9	0	0	0	0	0	0	0	0
1501	2007	1	4.1561	0	0	0	0	0	0	0	0	0	1	0	0	0	1	1	2013/12/31	26.2	26.2	26.2	26.2	0	0	0	0	0	0	0	0
1502	2007	0	4.1561	0	0	0	0	0	1	1	0	0	0	0	0	0	0	1	2013/12/31	32.5	32.5	32.5	32.5	0	0	0	0	0	0	0	0
1503	2006	1	4.1561	0	0	0	0	0	0	0	0	0	0	0	0	0	0	1	2013/12/31	37.4667	37.4667	37.4667	37.4667	0	0	0	0	0	0	0	0
1504	2003	1	4.1561	0	0	0	0	0	1	0	0	1	0	0	0	0	0	0	2013/12/31	72	72	72	72	0	0	0	0	0	0	0	0
1505	2003	0	4.1561	0	0	0	0	0	0	0	0	0	0	0	0	0	0	1	2013/12/31	72	72	72	72	0	0	0	0	0	0	0	0
1506	2002	0	4.1561	0	0	0	0	0	1	0	1	0	0	0	0	0	0	1	2013/12/31	88.2333	88.2333	88.2333	88.2333	0	0	0	0	0	0	0	0
1507	1999	1	4.1533	0	0	0	0	0	0	0	0	0	0	0	0	0	0	1	2013/12/31	126.867	126.867	126.867	126.867	0	0	0	0	0	0	0	0
1508	1999	0	4.1533	0	0	0	0	0	0	0	0	0	0	0	0	0	0	1	2013/12/31	131.833	131.833	131.833	131.833	0	0	0	0	0	0	0	0
1509	1999	1	4.1533	0	0	0	0	0	0	0	0	0	0	0	0	0	0	0	2013/12/31	131.967	131.967	131.967	131.967	0	0	0	0	0	0	0	0
1510	1999	0	4.1533	0	0	0	0	0	1	1	0	0	0	0	0	0	0	0	2013/12/31	132.033	132.033	132.033	132.033	0	0	0	0	0	0	0	0
1511	2002	1	4.1506	0	0	0	0	0	0	0	0	0	1	0	0	0	1	0	2013/12/31	3.2333	3.2333	95.3333	95.3333	1	1	0	0	1	1	0	0
1512	2007	0	4.1506	0	0	0	0	0	0	0	0	0	1	1	0	1	0	1	2013/12/31	32.6	32.6	32.6	32.6	0	0	0	0	0	0	0	0
1513	2007	1	4.1506	0	0	0	0	0	1	0	1	1	1	1	1	0	0	0	2013/12/31	32.6333	32.6333	32.6333	32.6333	0	0	0	0	0	0	0	0
1514	2007	1	4.1506	0	0	0	0	0	1	0	0	1	0	0	0	0	0	0	2013/12/31	32.6333	32.6333	32.6333	32.6333	0	0	0	0	0	0	0	0
1515	2006	1	4.1506	0	0	0	0	0	0	0	0	0	1	1	1	0	0	1	2013/12/31	42.6	42.6	42.6	42.6	0	0	0	0	0	0	0	0
1516	2002	0	4.1506	0	0	0	0	0	0	0	0	0	0	0	0	0	0	1	2013/12/31	95.3667	95.3667	95.3667	95.3667	0	0	0	0	0	0	0	0
1517	2002	0	4.1506	0	0	0	0	0	0	0	0	0	1	1	0	1	0	0	2013/12/31	95.4333	95.4333	95.4333	95.4333	0	0	0	0	0	0	0	0
1518	2005	1	4.1478	0	0	0	0	0	0	0	0	0	0	0	0	0	0	1	2013/12/31	55.6333	55.6333	55.6333	55.6333	0	0	0	0	0	0	0	0
1519	1998	1	4.1478	0	0	0	0	0	0	0	0	0	0	0	0	0	0	1	2013/12/31	143.1	143.1	143.1	143.1	0	0	0	0	0	0	0	0
1520	1997	1	4.1478	0	0	0	0	0	1	0	1	1	0	0	0	0	0	1	2013/12/31	153.267	153.267	153.267	153.267	0	0	0	0	0	0	0	0
1521	1996	1	4.1478	0	0	0	0	0	0	0	0	0	0	0	0	0	0	1	2013/12/31	159.433	159.433	159.433	159.433	0	0	0	0	0	0	0	0
1522	1996	1	4.1478	0	0	0	0	0	0	0	0	0	0	0	0	0	0	0	2013/12/31	159.5	159.5	159.5	159.5	0	0	0	0	0	0	0	0
1523	2007	1	4.1424	0	0	0	0	0	1	1	0	0	1	1	1	0	0	0	2013/12/31	26.5667	26.5667	26.5667	26.5667	0	0	0	0	0	0	0	0
1524	2007	1	4.1424	0	0	0	0	0	0	0	0	0	0	0	0	0	0	1	2013/12/31	26.5667	26.5667	26.5667	26.5667	0	0	0	0	0	0	0	0
1525	1999	1	4.1424	0	0	0	0	0	0	0	0	0	0	0	0	0	0	1	2013/12/31	128.833	128.833	128.833	128.833	0	0	0	0	0	0	0	0
1526	1996	1	4.1424	0	0	0	0	0	0	0	0	0	0	0	0	0	0	1	2013/12/31	164.533	164.533	164.533	164.533	0	0	0	0	0	0	0	0
1527	2008	1	4.1396	0	0	0	0	0	0	0	0	0	1	1	1	0	0	1	2013/12/31	14.3333	14.3333	14.3333	14.3333	0	0	0	0	0	0	0	0
1528	2004	1	4.1369	0	0	0	0	0	0	0	0	0	0	0	0	0	0	1	2013/12/31	71.1333	71.1333	71.1333	71.1333	0	0	0	0	0	0	0	0
1529	2006	1	4.1342	0	0	0	0	0	0	0	0	0	0	0	0	0	0	1	2013/12/31	4.6333	4.6333	36.6333	36.6333	1	1	0	0	1	1	0	0
1530	2000	1	4.1342	0	0	0	0	0	0	0	0	0	0	0	0	0	0	1	2013/12/31	108.8	108.8	108.8	108.8	0	0	0	0	0	0	0	0
1531	2000	0	4.1342	0	0	0	0	0	0	0	0	0	0	0	0	0	0	0	2013/12/31	108.833	108.833	108.833	108.833	0	0	0	0	0	0	0	0
1532	2000	0	4.1342	0	0	0	0	0	0	0	0	0	0	0	0	0	0	0	2013/12/31	108.833	108.833	108.833	108.833	0	0	0	0	0	0	0	0
1533	2000	0	4.1342	0	0	0	0	0	0	0	0	0	0	0	0	0	0	0	2013/12/31	108.9	108.9	108.9	108.9	0	0	0	0	0	0	0	0
1534	2005	0	4.1287	0	0	0	0	0	0	0	0	0	0	0	0	0	0	1	2013/12/31	55.9667	55.9667	55.9667	55.9667	0	0	0	0	0	0	0	0
1535	2003	1	4.1287	0	0	0	0	0	0	0	0	0	0	0	0	0	0	1	2013/12/31	79.4667	79.4667	79.4667	79.4667	0	0	0	0	0	0	0	0
1536	2007	1	4.1232	0	0	0	0	0	0	0	0	0	0	0	0	0	0	0	2013/12/31	24.5333	24.5333	24.5333	24.5333	0	0	0	0	0	0	0	0
1537	2007	0	4.1232	0	0	0	0	0	0	0	0	0	0	0	0	0	0	0	2013/12/31	24.7	24.7	24.7	24.7	0	0	0	0	0	0	0	0
1538	2007	1	4.1232	0	0	0	0	0	0	0	0	0	0	0	0	0	0	1	2013/12/31	24.7667	24.7667	24.7667	24.7667	0	0	0	0	0	0	0	0
1539	1997	1	4.1205	0	0	0	0	0	0	0	0	0	0	0	0	0	0	0	2013/12/31	3.1333	3.1333	145.5	145.5	1	1	0	0	1	1	0	0
1540	2005	1	4.1205	0	0	0	0	0	0	0	0	0	0	0	0	0	0	1	2013/12/31	55.1667	55.1667	55.1667	55.1667	0	0	0	0	0	0	0	0
1541	2002	0	4.1205	0	0	0	0	0	0	0	0	0	0	0	0	0	0	1	2013/12/31	93.7333	93.7333	93.7333	93.7333	0	0	0	0	0	0	0	0
1542	1997	0	4.1205	0	0	0	0	0	0	0	0	0	0	0	0	0	0	0	2013/12/31	145.5	145.5	145.5	145.5	0	0	0	0	0	0	0	0
1543	1997	1	4.1205	0	0	0	0	0	0	0	0	0	0	0	0	0	0	1	2013/12/31	145.5	145.5	145.5	145.5	0	0	0	0	0	0	0	0
1544	1997	1	4.1205	0	0	0	0	0	0	0	0	0	0	0	0	0	0	0	2013/12/31	145.533	145.533	145.533	145.533	0	0	0	0	0	0	0	0
1545	1997	1	4.1205	0	0	0	0	0	0	0	0	0	0	0	0	0	0	0	2013/12/31	145.567	145.567	145.567	145.567	0	0	0	0	0	0	0	0
1546	1997	0	4.1205	0	0	1	0	0	1	0	1	0	0	0	0	0	0	0	2013/12/31	145.567	145.567	145.567	145.567	0	0	0	0	0	0	0	0
1547	1999	1	4.1177	0	0	1	0	0	1	1	1	0	0	0	0	0	0	1	2013/12/31	128.267	128.267	128.267	128.267	0	0	0	0	0	0	0	0
1548	1999	1	4.115	0	0	0	0	0	1	0	1	0	0	0	0	0	0	0	2013/12/31	131.267	131.267	131.267	131.267	0	0	0	0	0	0	0	0
1549	1999	1	4.115	0	0	1	0	0	1	1	0	1	1	1	1	0	0	0	2013/12/31	131.3	131.3	131.3	131.3	0	0	0	0	0	0	0	0
1550	1999	1	4.115	0	0	0	0	0	1	1	0	1	0	0	0	0	0	1	2013/12/31	131.367	131.367	131.367	131.367	0	0	0	0	0	0	0	0
1551	1996	0	4.115	0	0	0	0	0	0	0	0	0	1	1	0	1	0	1	2013/12/31	168.933	168.933	168.933	168.933	0	0	0	0	0	0	0	0
1552	2006	0	4.1123	0	0	0	0	0	0	0	0	0	1	1	1	1	0	1	2013/12/31	0.0333	0.0333	0.0333	37.9667	0	0	0	0	0	0	0	0
1553	2007	0	4.1095	0	0	0	0	0	0	0	0	0	0	0	0	0	0	0	2013/12/31	29.9333	29.9333	29.9333	29.9333	0	0	0	0	0	0	0	0
1554	2007	1	4.1095	0	0	0	0	0	0	0	0	0	0	0	0	0	0	0	2013/12/31	30.1333	30.1333	30.1333	30.1333	0	0	0	0	0	0	0	0
1555	2007	1	4.1095	0	0	0	0	0	0	0	0	0	0	0	0	0	0	1	2013/12/31	35	35	35	35	0	0	0	0	0	0	0	0
1556	2007	1	4.1095	0	0	0	0	0	0	0	0	0	0	0	0	0	0	0	2013/12/31	35.0333	35.0333	35.0333	35.0333	0	0	0	0	0	0	0	0
1557	2007	1	4.1095	1	0	1	0	0	1	1	1	1	1	1	1	1	0	0	2013/12/31	35.0667	35.0667	35.0667	35.0667	0	0	0	0	0	0	0	0
1558	2001	1	4.1095	0	0	0	0	0	1	0	1	1	0	0	0	0	0	1	2013/12/31	98.9333	98.9333	98.9333	98.9333	0	0	0	0	0	0	0	0
1559	2001	1	4.1095	0	0	0	0	0	0	0	0	0	0	0	0	0	0	0	2013/12/31	99	99	99	99	0	0	0	0	0	0	0	0
1560	2001	1	4.1095	0	0	0	0	0	1	0	1	1	1	1	1	0	0	0	2013/12/31	102	102	102	102	0	0	0	0	0	0	0	0
1561	2001	1	4.1095	0	0	0	0	0	0	0	0	0	0	0	0	0	0	1	2013/12/31	102	102	102	102	0	0	0	0	0	0	0	0
1562	1998	1	4.1095	0	0	0	0	0	1	0	0	1	1	1	0	1	0	0	2013/12/31	135.4	135.4	135.4	135.4	0	0	0	0	0	0	0	0
1563	1998	1	4.1095	0	0	0	0	0	0	0	0	0	0	0	0	0	0	1	2013/12/31	135.533	135.533	135.533	135.533	0	0	0	0	0	0	0	0
1564	2007	0	4.1068	0	0	0	0	0	0	0	0	0	0	0	0	0	0	0	2013/12/31	8.1	30.0667	30.0667	8.1	1	0	0	1	1	0	0	1
1565	2007	0	4.1068	0	0	0	0	0	1	0	0	1	1	1	1	0	0	1	2013/12/31	30	30	30	30	0	0	0	0	0	0	0	0
1566	2006	1	4.1068	0	0	0	0	0	1	0	0	1	0	0	0	0	0	1	2013/12/31	35.8667	35.8667	35.8667	35.8667	0	0	0	0	0	0	0	0
1567	2003	0	4.1068	0	0	0	0	0	0	0	0	0	0	0	0	0	0	0	2013/12/31	77.7333	77.7333	77.7333	77.7333	0	0	0	0	0	0	0	0
1568	2003	1	4.1068	0	0	0	0	0	0	0	0	0	0	0	0	0	0	1	2013/12/31	77.7333	77.7333	77.7333	77.7333	0	0	0	0	0	0	0	0
1569	2003	1	4.1068	0	0	0	0	0	0	0	0	0	1	1	1	0	0	0	2013/12/31	77.7667	77.7667	77.7667	77.7667	0	0	0	0	0	0	0	0
1570	2003	1	4.1068	0	0	0	0	0	0	0	0	0	0	0	0	0	0	1	2013/12/31	81.7667	81.7667	81.7667	81.7667	0	0	0	0	0	0	0	0
1571	2000	1	4.1068	0	0	0	0	0	0	0	0	0	0	0	0	0	0	1	2013/12/31	114.667	114.667	114.667	114.667	0	0	0	0	0	0	0	0
1572	2000	1	4.1068	0	0	0	0	0	0	0	0	0	1	1	1	0	0	0	2013/12/31	115.233	115.233	115.233	115.233	0	0	0	0	0	0	0	0
1573	1999	1	4.1068	0	0	0	0	0	0	0	0	0	0	0	0	0	0	1	2013/12/31	123.367	123.367	123.367	123.367	0	0	0	0	0	0	0	0
1574	2007	0	4.104	0	0	0	0	0	0	0	0	0	1	1	1	0	0	1	2013/12/31	27.8	27.8	27.8	27.8	0	0	0	0	0	0	0	0
1575	2007	1	4.104	0	0	0	0	0	0	0	0	0	0	0	0	0	0	1	2013/12/31	34.8333	34.8333	34.8333	34.8333	0	0	0	0	0	0	0	0
1576	2007	1	4.104	0	0	0	0	0	0	0	0	0	1	1	0	1	1	0	2013/12/31	35.2	35.2	35.2	35.2	0	0	0	0	0	0	0	0
1577	2005	0	4.104	0	0	0	0	0	0	0	0	0	0	0	0	0	0	1	2013/12/31	49.1333	49.1333	49.1333	49.1333	0	0	0	0	0	0	0	0
1578	2005	1	4.104	0	0	0	0	0	0	0	0	0	0	0	0	0	0	0	2013/12/31	49.3333	49.3333	49.3333	49.3333	0	0	0	0	0	0	0	0
1579	2006	1	4.1013	0	0	0	0	0	1	1	0	1	0	0	0	0	0	0	2013/12/31	1.5	1.5	1.5	37.1667	1	1	1	0	1	1	1	0
1580	2006	0	4.1013	0	0	0	0	0	0	0	0	0	1	0	0	0	1	1	2013/12/31	37.0333	37.0333	37.0333	37.0333	0	0	0	0	0	0	0	0
1581	2006	1	4.1013	0	0	0	0	0	0	0	0	0	1	0	0	0	1	1	2013/12/31	46.2333	46.2333	46.2333	46.2333	0	0	0	0	0	0	0	0
1582	1998	0	4.1013	0	0	0	0	0	0	0	0	0	0	0	0	0	0	1	2013/12/31	144.7	144.7	144.7	144.7	0	0	0	0	0	0	0	0
1583	1998	1	4.1013	0	0	0	0	0	1	1	0	0	1	1	1	0	0	0	2013/12/31	144.733	144.733	144.733	144.733	0	0	0	0	0	0	0	0
1584	1998	0	4.1013	0	0	0	0	0	1	1	1	0	0	0	0	0	0	0	2013/12/31	144.767	144.767	144.767	144.767	0	0	0	0	0	0	0	0
1585	1996	1	4.1013	1	0	0	0	0	1	0	0	1	0	0	0	0	0	1	2013/12/31	165.9	165.9	165.9	165.9	0	0	0	0	0	0	0	0
1586	1996	1	4.1013	0	0	0	0	0	0	0	0	0	0	0	0	0	0	0	2013/12/31	166.1	166.1	166.1	166.1	0	0	0	0	0	0	0	0
1587	2005	1	4.0986	0	0	0	0	0	0	0	0	0	0	0	0	0	0	1	2013/12/31	4.8	4.8	52.5333	52.5333	1	1	0	0	1	1	0	0
1588	2008	0	4.0986	0	0	0	0	0	0	0	0	0	0	0	0	0	0	1	2013/12/31	19.7333	19.7333	19.7333	19.7333	0	0	0	0	0	0	0	0
1589	2002	1	4.0986	0	0	0	0	0	0	0	0	0	1	1	1	0	0	0	2013/12/31	93.9667	93.9667	93.9667	93.9667	0	0	0	0	0	0	0	0
1590	2002	1	4.0986	0	0	0	0	0	0	0	0	0	0	0	0	0	0	0	2013/12/31	94.1	94.1	94.1	94.1	0	0	0	0	0	0	0	0
1591	2002	0	4.0986	0	0	0	0	0	0	0	0	0	0	0	0	0	0	1	2013/12/31	94.1	94.1	94.1	94.1	0	0	0	0	0	0	0	0
1592	1999	1	4.0986	0	0	0	0	0	0	0	0	0	0	0	0	0	0	1	2013/12/31	126.333	126.333	126.333	126.333	0	0	0	0	0	0	0	0
1593	2003	1	4.0931	0	0	0	0	0	1	1	0	0	0	0	0	0	0	1	2013/12/31	79.9667	79.9667	79.9667	79.9667	0	0	0	0	0	0	0	0
1594	2000	1	4.0931	0	0	0	0	0	0	0	0	0	0	0	0	0	0	1	2013/12/31	111.233	111.233	111.233	111.233	0	0	0	0	0	0	0	0
1595	2000	0	4.0931	0	0	0	0	0	0	0	0	0	0	0	0	0	0	0	2013/12/31	111.3	111.3	111.3	111.3	0	0	0	0	0	0	0	0
1596	2000	1	4.0931	0	0	0	0	0	0	0	0	0	0	0	0	0	0	1	2013/12/31	120.567	120.567	120.567	120.567	0	0	0	0	0	0	0	0
1597	1999	0	4.0931	0	0	0	0	0	0	0	0	0	0	0	0	0	0	1	2013/12/31	124.567	124.567	124.567	124.567	0	0	0	0	0	0	0	0
1598	1996	1	4.0931	0	0	0	0	0	1	1	0	0	0	0	0	0	0	1	2013/12/31	158.9	158.9	158.9	158.9	0	0	0	0	0	0	0	0
1599	1997	1	4.0903	0	0	0	0	0	0	0	0	0	0	0	0	0	0	0	2013/12/31	0.3667	0.3667	145.933	145.933	0	0	0	0	0	0	0	0
1600	2004	1	4.0903	0	0	0	0	0	0	0	0	0	1	1	1	1	0	1	2013/12/31	63.6333	63.6333	63.6333	63.6333	0	0	0	0	0	0	0	0
1601	1997	0	4.0903	0	0	0	0	0	0	0	0	0	0	0	0	0	0	1	2013/12/31	145.767	145.767	145.767	145.767	0	0	0	0	0	0	0	0
1602	1997	1	4.0903	0	0	0	0	0	0	0	0	0	0	0	0	0	0	0	2013/12/31	145.867	145.867	145.867	145.867	0	0	0	0	0	0	0	0
1603	1997	1	4.0903	0	0	0	0	0	0	0	0	0	0	0	0	0	0	0	2013/12/31	145.933	145.933	145.933	145.933	0	0	0	0	0	0	0	0
1604	1998	1	4.0876	0	0	0	0	0	0	0	0	0	0	0	0	0	0	0	2003/06/30	5.7333	5.7333	5.7333	5.7333	0	0	0	0	0	0	0	0
1605	2008	0	4.0876	0	0	0	0	0	0	0	0	0	0	0	0	0	0	1	2013/12/31	20.1	20.1	20.1	20.1	0	0	0	0	0	0	0	0
1606	2001	0	4.0876	0	0	0	0	0	1	1	0	0	0	0	0	0	0	1	2013/12/31	104.4	104.4	104.4	104.4	0	0	0	0	0	0	0	0
1607	2001	1	4.0876	0	0	0	0	0	1	1	0	0	1	1	0	1	0	0	2013/12/31	104.4	104.4	104.4	104.4	0	0	0	0	0	0	0	0
1608	2000	1	4.0876	0	0	0	0	0	0	0	0	0	0	0	0	0	0	1	2013/12/31	119.4	119.4	119.4	119.4	0	0	0	0	0	0	0	0
1609	2000	0	4.0876	0	0	0	0	0	0	0	0	0	1	0	0	0	1	0	2013/12/31	119.5	119.5	119.5	119.5	0	0	0	0	0	0	0	0
1610	2000	1	4.0876	0	0	0	0	0	0	0	0	0	0	0	0	0	0	0	2013/12/31	119.533	119.533	119.533	119.533	0	0	0	0	0	0	0	0
1611	1998	1	4.0876	0	0	0	0	0	0	0	0	0	0	0	0	0	0	1	2013/12/31	133.6	133.6	133.6	133.6	0	0	0	0	0	0	0	0
1612	1998	0	4.0876	0	0	0	0	0	0	0	0	0	0	0	0	0	0	0	2013/12/31	133.7	133.7	133.7	133.7	0	0	0	0	0	0	0	0
1613	1998	0	4.0876	1	0	0	0	0	1	1	0	0	0	0	0	0	0	0	2013/12/31	133.8	133.8	133.8	133.8	0	0	0	0	0	0	0	0
1614	2007	1	4.0849	0	0	0	0	0	0	0	0	0	0	0	0	0	0	1	2013/12/31	25.1667	25.1667	25.1667	25.1667	0	0	0	0	0	0	0	0
1615	2003	1	4.0849	0	0	0	0	0	0	0	0	0	0	0	0	0	0	1	2013/12/31	81.0667	81.0667	81.0667	81.0667	0	0	0	0	0	0	0	0
1616	2005	1	4.0821	0	0	0	0	0	0	0	0	0	0	0	0	0	0	0	2013/12/31	56.7333	56.7333	56.7333	56.7333	0	0	0	0	0	0	0	0
1617	2005	1	4.0821	0	0	0	0	0	0	0	0	0	0	0	0	0	0	1	2013/12/31	56.7333	56.7333	56.7333	56.7333	0	0	0	0	0	0	0	0
1618	2001	0	4.0821	0	0	0	0	0	1	1	0	0	0	0	0	0	0	1	2013/12/31	98.3333	98.3333	98.3333	98.3333	0	0	0	0	0	0	0	0
1619	1996	1	4.0821	0	0	0	0	0	0	0	0	0	0	0	0	0	0	1	2013/12/31	168.333	168.333	168.333	168.333	0	0	0	0	0	0	0	0
1620	1996	1	4.0794	0	0	0	0	0	0	0	0	0	0	0	0	0	0	1	2013/12/31	159	159	159	159	0	0	0	0	0	0	0	0
1621	1996	1	4.0794	0	0	0	0	0	1	0	0	1	0	0	0	0	0	0	2013/12/31	159.167	159.167	159.167	159.167	0	0	0	0	0	0	0	0
1622	1996	1	4.0794	0	0	0	0	0	0	0	0	0	0	0	0	0	0	0	2013/12/31	159.167	159.167	159.167	159.167	0	0	0	0	0	0	0	0
1623	1996	1	4.0794	0	0	0	0	0	0	0	0	0	0	0	0	0	0	1	2013/12/31	166.433	166.433	166.433	166.433	0	0	0	0	0	0	0	0
1624	2003	1	4.0767	0	0	0	1	0	1	1	0	1	0	0	0	0	0	0	2013/12/31	5.2	5.9333	84.2	5.2	1	1	0	1	1	1	0	1
1625	1996	0	4.0767	0	0	0	0	0	1	1	1	0	1	1	0	1	0	0	2013/12/31	6.7333	167.2	167.2	6.7333	1	0	0	1	1	0	0	1
1626	2003	0	4.0767	0	0	0	0	0	0	0	0	0	0	0	0	0	0	1	2013/12/31	84.1333	84.1333	84.1333	84.1333	0	0	0	0	0	0	0	0
1627	2003	0	4.0767	0	0	0	0	0	1	0	0	1	0	0	0	0	0	0	2013/12/31	84.1667	84.1667	84.1667	84.1667	0	0	0	0	0	0	0	0
1628	2003	1	4.0767	0	0	0	0	0	0	0	0	0	0	0	0	0	0	0	2013/12/31	84.2	84.2	84.2	84.2	0	0	0	0	0	0	0	0
1629	2001	0	4.0767	0	0	0	0	0	1	1	0	0	1	1	1	0	0	1	2013/12/31	102.367	102.367	102.367	102.367	0	0	0	0	0	0	0	0
1630	2001	0	4.0767	0	0	0	0	0	0	0	0	0	1	1	1	1	0	0	2013/12/31	102.467	102.467	102.467	102.467	0	0	0	0	0	0	0	0
1631	2000	0	4.0767	0	0	0	0	0	1	0	0	1	0	0	0	0	0	0	2013/12/31	111.533	111.533	111.533	111.533	0	0	0	0	0	0	0	0
1632	2000	1	4.0767	0	0	0	0	0	1	0	0	1	0	0	0	0	0	1	2013/12/31	111.567	111.567	111.567	111.567	0	0	0	0	0	0	0	0
1633	1997	0	4.0767	0	0	0	0	0	1	0	0	1	1	1	0	1	0	1	2013/12/31	156.033	156.033	156.033	156.033	0	0	0	0	0	0	0	0
1634	1997	1	4.0767	0	0	0	0	0	0	0	0	0	0	0	0	0	0	0	2013/12/31	156.133	156.133	156.133	156.133	0	0	0	0	0	0	0	0
1635	1996	1	4.0767	0	0	0	0	0	0	0	0	0	0	0	0	0	0	1	2013/12/31	167.267	167.267	167.267	167.267	0	0	0	0	0	0	0	0
1636	1998	1	4.0739	0	0	0	0	0	0	0	0	0	0	0	0	0	0	0	2013/12/31	144.833	144.833	144.833	144.833	0	0	0	0	0	0	0	0
1637	1998	1	4.0739	0	0	0	0	0	0	0	0	0	0	0	0	0	0	0	2013/12/31	145.067	145.067	145.067	145.067	0	0	0	0	0	0	0	0
1638	1998	1	4.0739	0	0	0	0	0	0	0	0	0	0	0	0	0	0	1	2013/12/31	145.067	145.067	145.067	145.067	0	0	0	0	0	0	0	0
1639	1998	1	4.0739	0	0	0	0	0	0	0	0	0	0	0	0	0	0	0	2013/12/31	145.1	145.1	145.1	145.1	0	0	0	0	0	0	0	0
1640	1997	0	4.0657	0	0	0	0	0	1	1	0	0	0	0	0	0	0	1	2013/12/31	146.833	146.833	146.833	146.833	0	0	0	0	0	0	0	0
1641	1997	0	4.0657	0	0	0	0	0	0	0	0	0	0	0	0	0	0	0	2013/12/31	147.2	147.2	147.2	147.2	0	0	0	0	0	0	0	0
1642	1997	0	4.0657	0	0	0	0	0	0	0	0	0	0	0	0	0	0	0	2013/12/31	147.267	147.267	147.267	147.267	0	0	0	0	0	0	0	0
1643	1996	0	4.0657	0	0	0	0	0	0	0	0	0	1	1	0	1	0	0	2013/12/31	167.467	167.467	167.467	167.467	0	0	0	0	0	0	0	0
1644	1996	1	4.0657	0	0	0	0	0	0	0	0	0	0	0	0	0	0	1	2013/12/31	167.5	167.5	167.5	167.5	0	0	0	0	0	0	0	0
1645	2004	1	4.063	0	0	0	0	0	0	0	0	0	0	0	0	0	0	1	2013/12/31	60.9333	60.9333	60.9333	60.9333	0	0	0	0	0	0	0	0
1646	2004	1	4.063	0	0	0	0	0	0	0	0	0	0	0	0	0	0	0	2013/12/31	61.0333	61.0333	61.0333	61.0333	0	0	0	0	0	0	0	0
1647	2004	1	4.063	0	0	0	0	0	0	0	0	0	0	0	0	0	0	0	2013/12/31	61.1	61.1	61.1	61.1	0	0	0	0	0	0	0	0
1648	1996	1	4.0602	0	0	0	0	0	0	0	0	0	0	0	0	0	0	1	2013/12/31	5.1333	5.1333	164.533	164.533	1	1	0	0	1	1	0	0
1649	2007	1	4.0602	0	0	0	0	0	0	0	0	0	0	0	0	0	0	1	2013/12/31	26.3333	26.3333	26.3333	26.3333	0	0	0	0	0	0	0	0
1650	2007	0	4.0602	0	0	0	0	0	0	0	0	0	0	0	0	0	0	0	2013/12/31	26.6333	26.6333	26.6333	26.6333	0	0	0	0	0	0	0	0
1651	1996	1	4.0602	0	0	0	0	0	1	1	0	0	0	0	0	0	0	0	2013/12/31	164.533	164.533	164.533	164.533	0	0	0	0	0	0	0	0
1652	2007	1	4.0575	0	0	0	0	0	1	0	0	1	0	0	0	0	0	1	2013/12/31	6.1333	34.5333	6.1333	6.1333	1	0	1	1	1	0	1	1
1653	2007	1	4.0575	0	0	0	0	0	0	0	0	0	0	0	0	0	0	0	2013/12/31	34.6667	34.6667	34.6667	34.6667	0	0	0	0	0	0	0	0
1654	1998	0	4.0575	0	0	0	0	0	0	0	0	0	0	0	0	0	0	0	2013/12/31	134.033	134.033	134.033	134.033	0	0	0	0	0	0	0	0
1655	1998	0	4.0575	0	0	0	0	0	1	1	0	0	0	0	0	0	0	1	2013/12/31	134.2	134.2	134.2	134.2	0	0	0	0	0	0	0	0
1656	1997	0	4.0575	0	0	0	0	0	0	0	0	0	0	0	0	0	0	1	2013/12/31	155.433	155.433	155.433	155.433	0	0	0	0	0	0	0	0
1657	2002	1	4.0548	0	0	0	0	0	0	0	0	0	0	0	0	0	0	1	2013/12/31	92.5667	92.5667	92.5667	92.5667	0	0	0	0	0	0	0	0
1658	1997	0	4.0548	0	0	0	0	0	0	0	0	0	0	0	0	0	0	1	2013/12/31	153.433	153.433	153.433	153.433	0	0	0	0	0	0	0	0
1659	2005	0	4.0493	0	0	0	0	0	1	1	0	0	1	1	1	0	0	1	2013/12/31	58.9	58.9	58.9	58.9	0	0	0	0	0	0	0	0
1660	2005	1	4.0493	0	0	0	0	0	0	0	0	0	0	0	0	0	0	0	2013/12/31	59.1	59.1	59.1	59.1	0	0	0	0	0	0	0	0
1661	2001	0	4.0493	0	0	0	0	0	0	0	0	0	0	0	0	0	0	1	2013/12/31	106.867	106.867	106.867	106.867	0	0	0	0	0	0	0	0
1662	2001	1	4.0493	0	0	0	0	0	1	1	0	0	0	0	0	0	0	0	2013/12/31	106.9	106.9	106.9	106.9	0	0	0	0	0	0	0	0
1663	2004	0	4.0465	0	0	0	0	0	0	0	0	0	0	0	0	0	0	1	2013/12/31	6.9667	6.9667	61.9667	61.9667	1	1	0	0	1	1	0	0
1664	2006	1	4.0465	0	0	0	0	0	1	1	0	1	0	0	0	0	0	0	2013/12/31	46.0333	46.0333	46.0333	46.0333	0	0	0	0	0	0	0	0
1665	2006	0	4.0465	0	0	0	0	0	0	0	0	0	0	0	0	0	0	1	2013/12/31	46.0667	46.0667	46.0667	46.0667	0	0	0	0	0	0	0	0
1666	2004	1	4.0465	0	0	0	0	0	0	0	0	0	0	0	0	0	0	1	2013/12/31	60.8333	60.8333	60.8333	60.8333	0	0	0	0	0	0	0	0
1667	2004	1	4.0465	0	0	0	0	0	1	1	0	0	1	1	0	1	0	0	2013/12/31	62.1667	62.1667	62.1667	62.1667	0	0	0	0	0	0	0	0
1668	2004	1	4.0465	0	0	0	0	0	0	0	0	0	0	0	0	0	0	0	2013/12/31	62.2333	62.2333	62.2333	62.2333	0	0	0	0	0	0	0	0
1669	2000	1	4.0465	0	0	0	0	0	0	0	0	0	0	0	0	0	0	0	2013/12/31	110.8	110.8	110.8	110.8	0	0	0	0	0	0	0	0
1670	2000	0	4.0465	0	0	0	0	0	0	0	0	0	0	0	0	0	0	1	2013/12/31	110.9	110.9	110.9	110.9	0	0	0	0	0	0	0	0
1671	2000	1	4.0465	0	0	0	0	0	0	0	0	0	0	0	0	0	0	0	2013/12/31	110.967	110.967	110.967	110.967	0	0	0	0	0	0	0	0
1672	2002	1	4.0438	0	0	0	0	0	0	0	0	0	0	0	0	0	0	0	2013/12/31	93.6667	93.6667	93.6667	93.6667	0	0	0	0	0	0	0	0
1673	2002	0	4.0438	0	0	1	0	0	1	0	1	0	0	0	0	0	0	1	2013/12/31	93.6667	93.6667	93.6667	93.6667	0	0	0	0	0	0	0	0
1674	2002	0	4.0438	0	0	0	0	0	0	0	0	0	1	1	1	0	0	0	2013/12/31	93.7333	93.7333	93.7333	93.7333	0	0	0	0	0	0	0	0
1675	2002	1	4.0438	0	0	0	0	0	0	0	0	0	0	0	0	0	0	0	2013/12/31	93.7667	93.7667	93.7667	93.7667	0	0	0	0	0	0	0	0
1676	2002	1	4.0438	0	0	0	0	0	0	0	0	0	0	0	0	0	0	0	2013/12/31	93.8	93.8	93.8	93.8	0	0	0	0	0	0	0	0
1677	1999	0	4.0411	0	0	0	0	0	1	1	1	0	1	1	0	1	0	1	2013/12/31	4.4667	4.4667	123.867	123.867	1	1	0	0	1	1	0	0
1678	2007	0	4.0411	0	0	0	0	0	1	0	0	1	1	1	1	0	0	1	2013/12/31	32.7667	32.7667	32.7667	32.7667	0	0	0	0	0	0	0	0
1679	2007	1	4.0411	0	0	0	0	0	0	0	0	0	0	0	0	0	0	0	2013/12/31	32.9333	32.9333	32.9333	32.9333	0	0	0	0	0	0	0	0
1680	1996	1	4.0383	0	0	0	0	0	0	0	0	0	0	0	0	0	0	0	2013/12/31	0.8	163.767	163.767	0.8	0	0	0	0	1	0	0	1
1681	2008	1	4.0383	0	0	0	0	0	0	0	0	0	0	0	0	0	0	1	2013/12/31	15.5	15.5	15.5	15.5	0	0	0	0	0	0	0	0
1682	2002	1	4.0383	1	0	1	0	0	0	0	0	0	1	1	0	1	1	1	2013/12/31	89.6	89.6	89.6	89.6	0	0	0	0	0	0	0	0
1683	2002	1	4.0383	0	0	0	0	0	0	0	0	0	1	1	1	0	0	0	2013/12/31	89.7	89.7	89.7	89.7	0	0	0	0	0	0	0	0
1684	2002	1	4.0383	0	0	0	0	0	0	0	0	0	0	0	0	0	0	0	2013/12/31	89.7667	89.7667	89.7667	89.7667	0	0	0	0	0	0	0	0
1685	2000	1	4.0383	0	0	0	0	0	0	0	0	0	0	0	0	0	0	1	2013/12/31	118.967	118.967	118.967	118.967	0	0	0	0	0	0	0	0
1686	1999	0	4.0383	0	0	0	0	0	0	0	0	0	0	0	0	0	0	1	2013/12/31	122.067	122.067	122.067	122.067	0	0	0	0	0	0	0	0
1687	1999	1	4.0383	0	0	0	0	0	0	0	0	0	0	0	0	0	0	0	2013/12/31	122.2	122.2	122.2	122.2	0	0	0	0	0	0	0	0
1688	1996	1	4.0383	0	0	0	0	0	0	0	0	0	0	0	0	0	0	1	2013/12/31	163.733	163.733	163.733	163.733	0	0	0	0	0	0	0	0
1689	2005	0	4.0356	0	0	0	0	0	0	0	0	0	0	0	0	0	0	1	2013/12/31	55.2667	55.2667	55.2667	55.2667	0	0	0	0	0	0	0	0
1690	1998	0	4.0356	0	0	0	0	0	0	0	0	0	0	0	0	0	0	1	2013/12/31	143.467	143.467	143.467	143.467	0	0	0	0	0	0	0	0
1691	2003	1	4.0301	0	0	0	0	0	0	0	0	0	1	1	1	0	0	1	2013/12/31	80.6	80.6	80.6	80.6	0	0	0	0	0	0	0	0
1692	2001	0	4.0301	0	0	0	0	0	0	0	0	0	1	1	0	1	0	1	2013/12/31	98.3667	98.3667	98.3667	98.3667	0	0	0	0	0	0	0	0
1693	1996	1	4.0274	0	0	0	0	0	0	0	0	0	0	0	0	0	0	1	2013/12/31	166.967	166.967	166.967	166.967	0	0	0	0	0	0	0	0
1694	1996	1	4.0274	0	0	0	0	0	0	0	0	0	0	0	0	0	0	0	2013/12/31	167	167	167	167	0	0	0	0	0	0	0	0
1695	2002	1	4.0246	0	0	0	0	0	1	0	0	1	1	1	1	0	0	0	2013/12/31	89.8	89.8	89.8	89.8	0	0	0	0	0	0	0	0
1696	2002	1	4.0246	1	0	0	0	0	1	1	0	1	1	1	1	0	0	1	2013/12/31	89.8333	89.8333	89.8333	89.8333	0	0	0	0	0	0	0	0
1697	2001	1	4.0246	0	0	0	0	0	0	0	0	0	0	0	0	0	0	1	2013/12/31	98	98	98	98	0	0	0	0	0	0	0	0
1698	2001	1	4.0246	0	0	0	0	0	1	1	0	1	1	1	1	0	0	0	2013/12/31	104.067	104.067	104.067	104.067	0	0	0	0	0	0	0	0
1699	2001	1	4.0246	0	0	0	0	0	1	1	0	0	0	0	0	0	0	1	2013/12/31	104.1	104.1	104.1	104.1	0	0	0	0	0	0	0	0
1700	2000	1	4.0246	0	0	0	0	0	0	0	0	0	0	0	0	0	0	1	2013/12/31	112.2	112.2	112.2	112.2	0	0	0	0	0	0	0	0
1701	2000	0	4.0246	0	0	0	0	0	1	1	0	0	0	0	0	0	0	0	2013/12/31	116.233	116.233	116.233	116.233	0	0	0	0	0	0	0	0
1702	2000	0	4.0246	0	0	0	0	0	1	1	1	1	0	0	0	0	0	0	2013/12/31	116.233	116.233	116.233	116.233	0	0	0	0	0	0	0	0
1703	2000	0	4.0246	0	0	0	0	0	0	0	0	0	0	0	0	0	0	1	2013/12/31	116.233	116.233	116.233	116.233	0	0	0	0	0	0	0	0
1704	2000	1	4.0246	0	0	0	0	0	0	0	0	0	0	0	0	0	0	0	2013/12/31	116.367	116.367	116.367	116.367	0	0	0	0	0	0	0	0
1705	2004	0	4.0219	0	0	0	0	0	1	1	0	0	1	1	1	0	0	1	2013/12/31	4.5333	4.5333	67.4333	67.4333	1	1	0	0	1	1	0	0
1706	2004	0	4.0219	0	0	0	0	0	1	1	0	0	0	0	0	0	0	0	2013/12/31	11.4	11.4	67.6333	67.6333	1	1	0	0	1	1	0	0
1707	2006	1	4.0219	0	0	0	0	0	1	1	1	0	0	0	0	0	0	0	2013/12/31	41.1667	41.1667	41.1667	41.1667	0	0	0	0	0	0	0	0
1708	2006	1	4.0219	0	0	0	0	0	0	0	0	0	0	0	0	0	0	0	2013/12/31	41.2	41.2	41.2	41.2	0	0	0	0	0	0	0	0
1709	2006	0	4.0219	0	0	0	0	0	0	0	0	0	0	0	0	0	0	1	2013/12/31	41.3	41.3	41.3	41.3	0	0	0	0	0	0	0	0
1710	2004	1	4.0219	0	0	0	0	0	0	0	0	0	0	0	0	0	0	0	2013/12/31	67.6333	67.6333	67.6333	67.6333	0	0	0	0	0	0	0	0
1711	2004	1	4.0219	0	0	0	0	0	0	0	0	0	0	0	0	0	0	0	2013/12/31	67.6333	67.6333	67.6333	67.6333	0	0	0	0	0	0	0	0
1712	1997	0	4.0219	0	0	0	0	0	0	0	0	0	0	0	0	0	0	1	2013/12/31	146.667	146.667	146.667	146.667	0	0	0	0	0	0	0	0
1713	2006	1	4.0192	0	0	0	0	0	0	0	0	0	0	0	0	0	0	1	2013/12/31	41.1667	41.1667	41.1667	41.1667	0	0	0	0	0	0	0	0
1714	2006	1	4.0192	0	0	0	0	0	0	0	0	0	0	0	0	0	0	0	2013/12/31	41.2	41.2	41.2	41.2	0	0	0	0	0	0	0	0
1715	2006	1	4.0164	0	0	0	0	0	0	0	0	0	0	0	0	0	0	1	2013/12/31	46.3	46.3	46.3	46.3	0	0	0	0	0	0	0	0
1716	2006	1	4.0164	0	0	0	0	0	1	1	0	1	0	0	0	0	0	0	2013/12/31	46.3667	46.3667	46.3667	46.3667	0	0	0	0	0	0	0	0
1717	1999	0	4.0164	0	0	0	0	0	1	0	0	1	0	0	0	0	0	1	2013/12/31	123.433	123.433	123.433	123.433	0	0	0	0	0	0	0	0
1718	2002	1	4.011	0	0	0	0	0	0	0	0	0	0	0	0	0	0	1	2013/12/31	94.0667	94.0667	94.0667	94.0667	0	0	0	0	0	0	0	0
1719	2002	1	4.0082	0	0	1	0	0	1	0	0	1	1	1	1	0	0	0	2013/12/31	4.5333	4.5333	93.1	93.1	1	1	0	0	1	1	0	0
1720	2002	0	4.0082	0	0	0	0	0	0	0	0	0	0	0	0	0	0	1	2013/12/31	93.1333	93.1333	93.1333	93.1333	0	0	0	0	0	0	0	0
1721	2002	0	4.0082	0	0	0	0	0	0	0	0	0	0	0	0	0	0	1	2013/12/31	97.0333	97.0333	97.0333	97.0333	0	0	0	0	0	0	0	0
1722	2002	1	4.0082	0	0	0	0	0	0	0	0	0	0	0	0	0	0	0	2013/12/31	97.2	97.2	97.2	97.2	0	0	0	0	0	0	0	0
1723	2001	1	4.0082	0	0	0	0	0	0	0	0	0	1	0	0	0	1	1	2013/12/31	108.267	108.267	108.267	108.267	0	0	0	0	0	0	0	0
1724	2001	0	4.0082	0	0	0	0	0	1	1	1	1	0	0	0	0	0	0	2013/12/31	108.367	108.367	108.367	108.367	0	0	0	0	0	0	0	0
1725	2001	1	4.0082	0	0	0	0	0	0	0	0	0	0	0	0	0	0	1	2013/12/31	109.233	109.233	109.233	109.233	0	0	0	0	0	0	0	0
1726	2000	1	4.0055	0	0	0	0	0	1	1	1	0	1	1	0	1	0	0	2013/12/31	2.5	112.433	2.5	112.433	1	0	1	0	1	0	1	0
1727	2000	1	4.0055	0	0	0	0	0	1	1	0	0	1	1	1	0	0	1	2013/12/31	112.367	112.367	112.367	112.367	0	0	0	0	0	0	0	0
1728	2000	1	4.0055	0	0	0	0	0	0	0	0	0	0	0	0	0	0	0	2013/12/31	112.467	112.467	112.467	112.467	0	0	0	0	0	0	0	0
1729	1998	1	4.0027	0	0	0	0	0	1	1	1	1	0	0	0	0	0	0	2013/12/31	5.9333	5.9333	136.8	136.8	1	1	0	0	1	1	0	0
1730	2004	0	4.0027	0	0	0	0	0	0	0	0	0	0	0	0	0	0	0	2013/12/31	6.4	71.9333	71.9333	6.4	1	0	0	1	1	0	0	1
1731	2004	0	4.0027	0	0	0	0	0	0	0	0	0	0	0	0	0	0	1	2013/12/31	71.7667	71.7667	71.7667	71.7667	0	0	0	0	0	0	0	0
1732	1998	1	4.0027	0	0	0	0	0	0	0	0	0	0	0	0	0	0	0	2013/12/31	136.767	136.767	136.767	136.767	0	0	0	0	0	0	0	0
1733	1998	1	4.0027	0	0	0	0	0	0	0	0	0	0	0	0	0	0	0	2013/12/31	136.8	136.8	136.8	136.8	0	0	0	0	0	0	0	0
1734	1998	1	4.0027	0	0	0	0	0	1	1	0	0	0	0	0	0	0	1	2013/12/31	136.833	136.833	136.833	136.833	0	0	0	0	0	0	0	0
1735	1997	1	4.0027	0	0	0	0	0	0	0	0	0	0	0	0	0	0	1	2013/12/31	151.933	151.933	151.933	151.933	0	0	0	0	0	0	0	0
1736	1999	1	3.9973	0	0	0	0	0	0	0	0	0	1	0	0	0	1	0	2013/12/31	133.767	133.767	133.767	133.767	0	0	0	0	0	0	0	0
1737	1999	1	3.9973	0	0	0	0	0	0	0	0	0	1	1	1	1	0	0	2013/12/31	133.833	133.833	133.833	133.833	0	0	0	0	0	0	0	0
1738	1999	1	3.9973	0	0	0	0	0	1	0	1	0	1	1	0	1	0	1	2013/12/31	133.833	133.833	133.833	133.833	0	0	0	0	0	0	0	0
1739	1998	0	3.9945	0	0	0	1	0	0	0	0	0	1	1	0	1	0	0	2013/12/31	137.833	137.833	137.833	137.833	0	0	0	0	0	0	0	0
1740	1998	1	3.9945	0	0	0	0	0	0	0	0	0	0	0	0	0	0	1	2013/12/31	137.9	137.9	137.9	137.9	0	0	0	0	0	0	0	0
1741	2002	1	3.9918	0	0	0	0	0	0	0	0	0	0	0	0	0	0	1	2013/12/31	5.0667	5.0667	92.0333	92.0333	1	1	0	0	1	1	0	0
1742	2008	1	3.989	0	0	0	0	0	1	1	0	1	1	0	0	0	1	1	2013/12/31	24.1667	24.1667	24.1667	24.1667	0	0	0	0	0	0	0	0
1743	1996	1	3.989	0	0	0	0	0	0	0	0	0	1	0	0	0	1	0	2013/12/31	159.1	159.1	159.1	159.1	0	0	0	0	0	0	0	0
1744	1996	1	3.989	0	0	0	0	0	0	0	0	0	0	0	0	0	0	1	2013/12/31	159.3	159.3	159.3	159.3	0	0	0	0	0	0	0	0
1745	2008	1	3.9836	0	0	0	0	0	1	1	0	0	0	0	0	0	0	1	2013/12/31	22.3	22.3	22.3	22.3	0	0	0	0	0	0	0	0
1746	2005	0	3.9836	0	0	0	0	0	0	0	0	0	0	0	0	0	0	0	2013/12/31	54.8	54.8	54.8	54.8	0	0	0	0	0	0	0	0
1747	2005	0	3.9836	0	0	0	0	0	0	0	0	0	0	0	0	0	0	1	2013/12/31	54.8667	54.8667	54.8667	54.8667	0	0	0	0	0	0	0	0
1748	2004	0	3.9836	0	0	0	0	0	0	0	0	0	0	0	0	0	0	1	2013/12/31	69.5667	69.5667	69.5667	69.5667	0	0	0	0	0	0	0	0
1749	2004	1	3.9836	0	0	0	0	0	0	0	0	0	1	1	1	0	0	0	2013/12/31	70.0333	70.0333	70.0333	70.0333	0	0	0	0	0	0	0	0
1750	2004	1	3.9836	0	0	0	0	0	0	0	0	0	0	0	0	0	0	0	2013/12/31	70.1	70.1	70.1	70.1	0	0	0	0	0	0	0	0
1751	1998	1	3.9836	0	0	0	0	0	0	0	0	0	0	0	0	0	0	1	2013/12/31	142.933	142.933	142.933	142.933	0	0	0	0	0	0	0	0
1752	1998	0	3.9836	0	0	0	0	0	0	0	0	0	1	1	1	0	0	0	2013/12/31	143.133	143.133	143.133	143.133	0	0	0	0	0	0	0	0
1753	1996	1	3.9836	0	0	0	0	0	0	0	0	0	0	0	0	0	0	1	2013/12/31	162.367	162.367	162.367	162.367	0	0	0	0	0	0	0	0
1754	1996	1	3.9836	0	0	0	0	0	0	0	0	0	0	0	0	0	0	1	2013/12/31	166.2	166.2	166.2	166.2	0	0	0	0	0	0	0	0
1755	2005	1	3.9808	0	0	0	0	0	0	0	0	0	0	0	0	0	0	1	2013/12/31	58.6	58.6	58.6	58.6	0	0	0	0	0	0	0	0
1756	2005	0	3.9808	0	0	0	0	0	1	0	0	1	0	0	0	0	0	1	2013/12/31	61	61	61	61	0	0	0	0	0	0	0	0
1757	1997	1	3.9808	0	0	0	0	0	0	0	0	0	1	1	1	0	0	1	2013/12/31	156.4	156.4	156.4	156.4	0	0	0	0	0	0	0	0
1758	1997	1	3.9808	0	0	0	0	0	0	0	0	0	0	0	0	0	0	0	2013/12/31	156.433	156.433	156.433	156.433	0	0	0	0	0	0	0	0
1759	1997	0	3.9808	0	0	0	0	0	0	0	0	0	0	0	0	0	0	0	2013/12/31	156.433	156.433	156.433	156.433	0	0	0	0	0	0	0	0
1760	1997	1	3.9808	0	0	0	0	0	0	0	0	0	0	0	0	0	0	0	2013/12/31	156.467	156.467	156.467	156.467	0	0	0	0	0	0	0	0
1761	1997	1	3.9808	0	0	0	0	0	0	0	0	0	0	0	0	0	0	0	2013/12/31	156.467	156.467	156.467	156.467	0	0	0	0	0	0	0	0
1762	1996	0	3.9808	0	0	0	0	0	0	0	0	0	0	0	0	0	0	1	2013/12/31	162.333	162.333	162.333	162.333	0	0	0	0	0	0	0	0
1763	1996	0	3.9808	0	0	0	0	0	0	0	0	0	0	0	0	0	0	0	2013/12/31	162.4	162.4	162.4	162.4	0	0	0	0	0	0	0	0
1764	2001	1	3.9781	0	0	0	0	0	0	0	0	0	0	0	0	0	0	1	2013/12/31	105.667	105.667	105.667	105.667	0	0	0	0	0	0	0	0
1765	1997	1	3.9781	0	0	0	0	0	0	0	0	0	0	0	0	0	0	0	2013/12/31	147.2	147.2	147.2	147.2	0	0	0	0	0	0	0	0
1766	1997	1	3.9781	0	0	0	0	0	0	0	0	0	0	0	0	0	0	1	2013/12/31	147.267	147.267	147.267	147.267	0	0	0	0	0	0	0	0
1767	1997	0	3.9781	0	0	0	0	0	0	0	0	0	0	0	0	0	0	0	2013/12/31	147.333	147.333	147.333	147.333	0	0	0	0	0	0	0	0
1768	1997	1	3.9781	0	0	0	0	0	1	1	0	0	0	0	0	0	0	0	2013/12/31	147.333	147.333	147.333	147.333	0	0	0	0	0	0	0	0
1769	2004	1	3.9754	0	0	0	0	0	1	1	0	1	0	0	0	0	0	0	2013/12/31	7	7	67.1333	67.1333	1	1	0	0	1	1	0	0
1770	2008	1	3.9754	0	0	0	0	0	0	0	0	0	0	0	0	0	0	1	2013/12/31	22.5	22.5	22.5	22.5	0	0	0	0	0	0	0	0
1771	2005	1	3.9754	0	0	0	0	0	0	0	0	0	0	0	0	0	0	0	2013/12/31	58.0333	58.0333	58.0333	58.0333	0	0	0	0	0	0	0	0
1772	2005	1	3.9754	0	0	0	0	0	1	1	1	1	0	0	0	0	0	1	2013/12/31	58.0333	58.0333	58.0333	58.0333	0	0	0	0	0	0	0	0
1773	2000	0	3.9754	0	0	0	0	0	0	0	0	0	0	0	0	0	0	1	2013/12/31	112.733	112.733	112.733	112.733	0	0	0	0	0	0	0	0
1774	2007	1	3.9699	0	0	0	1	0	1	1	0	0	0	0	0	0	0	1	2013/12/31	33.8	33.8	33.8	33.8	0	0	0	0	0	0	0	0
1775	2006	0	3.9699	0	0	0	0	0	0	0	0	0	0	0	0	0	0	1	2013/12/31	41.7	41.7	41.7	41.7	0	0	0	0	0	0	0	0
1776	2006	1	3.9699	0	0	0	0	0	0	0	0	0	0	0	0	0	0	0	2013/12/31	41.8667	41.8667	41.8667	41.8667	0	0	0	0	0	0	0	0
1777	2006	1	3.9699	0	0	0	0	0	0	0	0	0	0	0	0	0	0	0	2013/12/31	41.9	41.9	41.9	41.9	0	0	0	0	0	0	0	0
1778	2002	0	3.9699	0	0	0	0	0	1	1	0	0	0	0	0	0	0	1	2013/12/31	89.5	89.5	89.5	89.5	0	0	0	0	0	0	0	0
1779	2002	0	3.9699	0	0	0	0	0	0	0	0	0	0	0	0	0	0	0	2013/12/31	89.5333	89.5333	89.5333	89.5333	0	0	0	0	0	0	0	0
1780	2000	0	3.9699	0	0	0	0	0	1	0	0	1	0	0	0	0	0	1	2013/12/31	116.833	116.833	116.833	116.833	0	0	0	0	0	0	0	0
1781	2000	0	3.9699	0	0	0	0	0	1	1	0	0	0	0	0	0	0	0	2013/12/31	116.933	116.933	116.933	116.933	0	0	0	0	0	0	0	0
1782	1998	1	3.9699	0	0	0	0	0	1	1	0	1	0	0	0	0	0	1	2013/12/31	138.033	138.033	138.033	138.033	0	0	0	0	0	0	0	0
1783	1996	1	3.9699	0	0	0	0	0	0	0	0	0	1	1	1	0	0	0	2013/12/31	164.567	164.567	164.567	164.567	0	0	0	0	0	0	0	0
1784	1996	0	3.9699	0	0	0	0	0	0	0	0	0	0	0	0	0	0	0	2013/12/31	164.633	164.633	164.633	164.633	0	0	0	0	0	0	0	0
1785	1996	1	3.9699	0	0	0	0	0	0	0	0	0	0	0	0	0	0	1	2013/12/31	164.667	164.667	164.667	164.667	0	0	0	0	0	0	0	0
1786	2004	1	3.9671	0	0	0	0	0	1	1	1	0	0	0	0	0	0	1	2013/12/31	8.4	67	67	8.4	1	0	0	1	1	0	0	1
1787	2004	0	3.9671	0	0	0	0	0	0	0	0	0	1	1	1	0	0	0	2013/12/31	67.2	67.2	67.2	67.2	0	0	0	0	0	0	0	0
1788	2004	1	3.9671	0	0	0	0	0	0	0	0	0	0	0	0	0	0	1	2013/12/31	67.2667	67.2667	67.2667	67.2667	0	0	0	0	0	0	0	0
1789	2000	0	3.9589	0	0	0	0	0	1	1	1	1	1	1	1	0	0	1	2013/12/31	7.8333	7.8333	117.967	117.967	1	1	0	0	1	1	0	0
1790	2000	1	3.9589	0	0	0	0	0	0	0	0	0	0	0	0	0	0	0	2006/11/25	31.6667	31.6667	31.6667	31.6667	0	0	0	0	0	0	0	0
1791	2004	1	3.9589	0	0	0	0	0	1	0	1	0	1	1	0	1	0	1	2013/12/31	63.2	63.2	63.2	63.2	0	0	0	0	0	0	0	0
1792	2004	1	3.9589	0	0	0	0	0	0	0	0	0	0	0	0	0	0	0	2013/12/31	63.3	63.3	63.3	63.3	0	0	0	0	0	0	0	0
1793	1999	1	3.9589	0	0	0	0	0	1	0	0	1	0	0	0	0	0	1	2013/12/31	123.1	123.1	123.1	123.1	0	0	0	0	0	0	0	0
1794	1999	1	3.9589	0	0	0	0	0	0	0	0	0	0	0	0	0	0	0	2013/12/31	123.2	123.2	123.2	123.2	0	0	0	0	0	0	0	0
1795	1997	1	3.9589	0	0	0	0	0	0	0	0	0	0	0	0	0	0	1	2013/12/31	150.5	150.5	150.5	150.5	0	0	0	0	0	0	0	0
1796	2004	0	3.9562	0	0	0	0	0	0	0	0	0	0	0	0	0	0	1	2013/12/31	68.4	68.4	68.4	68.4	0	0	0	0	0	0	0	0
1797	1996	1	3.9562	0	0	0	0	0	1	1	0	0	0	0	0	0	0	0	2012/09/10	150.833	150.833	150.833	150.833	0	0	0	0	0	0	0	0
1798	1996	1	3.9562	0	0	0	0	0	1	1	0	0	0	0	0	0	0	1	2013/12/31	166.7	166.7	166.7	166.7	0	0	0	0	0	0	0	0
1799	2001	0	3.9535	0	0	0	0	0	0	0	0	0	1	1	1	0	0	1	2013/12/31	104.767	104.767	104.767	104.767	0	0	0	0	0	0	0	0
1800	2001	1	3.9535	0	0	0	0	0	0	0	0	0	0	0	0	0	0	0	2013/12/31	105	105	105	105	0	0	0	0	0	0	0	0
1801	2007	1	3.9507	0	0	0	0	0	0	0	0	0	0	0	0	0	0	1	2013/12/31	35.9	35.9	35.9	35.9	0	0	0	0	0	0	0	0
1802	2002	1	3.9507	0	0	0	0	0	0	0	0	0	0	0	0	0	0	1	2013/12/31	87.7	87.7	87.7	87.7	0	0	0	0	0	0	0	0
1803	1999	1	3.9507	0	0	0	0	0	0	0	0	0	0	0	0	0	0	1	2013/12/31	131.167	131.167	131.167	131.167	0	0	0	0	0	0	0	0
1804	1999	0	3.9507	0	0	0	0	0	0	0	0	0	0	0	0	0	0	0	2013/12/31	131.4	131.4	131.4	131.4	0	0	0	0	0	0	0	0
1805	1999	0	3.9507	1	0	0	0	0	0	0	0	0	0	0	0	0	0	0	2013/12/31	131.433	131.433	131.433	131.433	0	0	0	0	0	0	0	0
1806	1999	0	3.9507	0	0	0	0	0	0	0	0	0	0	0	0	0	0	1	2013/12/31	133.267	133.267	133.267	133.267	0	0	0	0	0	0	0	0
1807	1999	1	3.9507	0	0	0	0	0	0	0	0	0	0	0	0	0	0	0	2013/12/31	133.333	133.333	133.333	133.333	0	0	0	0	0	0	0	0
1808	2001	0	3.9452	0	0	0	0	0	0	0	0	0	0	0	0	0	0	1	2013/12/31	110.033	110.033	110.033	110.033	0	0	0	0	0	0	0	0
1809	2000	1	3.9425	0	0	0	0	0	1	1	0	0	1	1	0	1	0	1	2013/12/31	118.167	118.167	118.167	118.167	0	0	0	0	0	0	0	0
1810	1998	1	3.9425	0	0	0	0	0	0	0	0	0	0	0	0	0	0	1	2013/12/31	141.467	141.467	141.467	141.467	0	0	0	0	0	0	0	0
1811	1996	1	3.9425	0	0	0	0	0	1	1	0	0	1	1	1	0	0	1	2013/12/31	170.5	170.5	170.5	170.5	0	0	0	0	0	0	0	0
1812	1996	0	3.9425	0	0	0	0	0	0	0	0	0	1	1	1	0	0	0	2013/12/31	171	171	171	171	0	0	0	0	0	0	0	0
1813	1996	1	3.9425	0	0	0	0	0	0	0	0	0	0	0	0	0	0	0	2013/12/31	171.033	171.033	171.033	171.033	0	0	0	0	0	0	0	0
1814	1996	0	3.9425	0	0	0	0	0	0	0	0	0	0	0	0	0	0	0	2013/12/31	171.067	171.067	171.067	171.067	0	0	0	0	0	0	0	0
1815	1996	0	3.9425	0	0	0	0	0	0	0	0	0	0	0	0	0	0	0	2013/12/31	171.067	171.067	171.067	171.067	0	0	0	0	0	0	0	0
1816	1996	0	3.9425	0	0	0	0	0	0	0	0	0	0	0	0	0	0	0	2013/12/31	171.067	171.067	171.067	171.067	0	0	0	0	0	0	0	0
1817	1997	1	3.9398	0	0	0	0	0	0	0	0	0	0	0	0	0	0	1	2013/12/31	149.7	149.7	149.7	149.7	0	0	0	0	0	0	0	0
1818	1997	1	3.9398	0	0	0	0	0	0	0	0	0	0	0	0	0	0	0	2013/12/31	153.833	153.833	153.833	153.833	0	0	0	0	0	0	0	0
1819	1997	1	3.9398	0	0	0	0	0	0	0	0	0	0	0	0	0	0	1	2013/12/31	153.867	153.867	153.867	153.867	0	0	0	0	0	0	0	0
1820	2001	1	3.937	0	0	0	0	0	1	1	0	0	0	0	0	0	0	1	2013/12/31	101.033	101.033	101.033	101.033	0	0	0	0	0	0	0	0
1821	2002	0	3.9343	0	0	0	0	0	0	0	0	0	0	0	0	0	0	1	2013/12/31	96.0333	96.0333	96.0333	96.0333	0	0	0	0	0	0	0	0
1822	1998	0	3.9343	0	0	0	0	0	1	1	0	0	0	0	0	0	0	1	2013/12/31	139.567	139.567	139.567	139.567	0	0	0	0	0	0	0	0
1823	1997	0	3.9316	0	0	0	0	0	0	0	0	0	0	0	0	0	0	1	2013/12/31	151.9	151.9	151.9	151.9	0	0	0	0	0	0	0	0
1824	2007	1	3.9288	0	0	0	0	0	0	0	0	0	0	0	0	0	0	1	2013/12/31	30.1333	30.1333	30.1333	30.1333	0	0	0	0	0	0	0	0
1825	2001	1	3.9288	0	0	0	0	0	1	0	1	1	0	0	0	0	0	1	2013/12/31	106.8	106.8	106.8	106.8	0	0	0	0	0	0	0	0
1826	2008	0	3.9233	0	0	0	0	0	0	0	0	0	0	0	0	0	0	1	2013/12/31	15.0333	15.0333	15.0333	15.0333	0	0	0	0	0	0	0	0
1827	2008	1	3.9233	0	0	0	0	0	0	0	0	0	0	0	0	0	0	0	2013/12/31	15.0333	15.0333	15.0333	15.0333	0	0	0	0	0	0	0	0
1828	2005	0	3.9233	0	0	0	0	0	0	0	0	0	0	0	0	0	0	1	2013/12/31	53.6	53.6	53.6	53.6	0	0	0	0	0	0	0	0
1829	2004	0	3.9206	0	0	0	0	0	1	1	0	1	1	1	1	0	0	1	2013/12/31	7.2	7.2	65.5	65.5	1	1	0	0	1	1	0	0
1830	2001	0	3.9206	0	0	0	0	0	0	0	0	0	0	0	0	0	0	1	2013/12/31	106.167	106.167	106.167	106.167	0	0	0	0	0	0	0	0
1831	1998	0	3.9206	0	0	0	0	0	0	0	0	0	0	0	0	0	0	0	2013/12/31	135.7	135.7	135.7	135.7	0	0	0	0	0	0	0	0
1832	1998	1	3.9206	0	0	0	0	0	1	0	1	0	0	0	0	0	0	1	2013/12/31	135.767	135.767	135.767	135.767	0	0	0	0	0	0	0	0
1833	1998	0	3.9206	0	0	0	0	0	0	0	0	0	0	0	0	0	0	0	2013/12/31	135.8	135.8	135.8	135.8	0	0	0	0	0	0	0	0
1834	1997	1	3.9206	0	0	0	0	0	0	0	0	0	0	0	0	0	0	1	2013/12/31	154.067	154.067	154.067	154.067	0	0	0	0	0	0	0	0
1835	1996	0	3.9179	0	0	0	0	0	0	0	0	0	0	0	0	0	0	1	2013/12/31	0.4667	0.4667	0.4667	167.1	0	0	0	0	0	0	0	0
1836	2003	0	3.9179	0	0	0	0	0	0	0	0	0	0	0	0	0	0	0	2013/12/31	79	79	79	79	0	0	0	0	0	0	0	0
1837	2003	1	3.9179	0	0	0	0	0	0	0	0	0	0	0	0	0	0	1	2013/12/31	79.0333	79.0333	79.0333	79.0333	0	0	0	0	0	0	0	0
1838	1997	0	3.9179	0	0	0	0	0	1	1	0	0	1	1	1	0	0	1	2013/12/31	158.1	158.1	158.1	158.1	0	0	0	0	0	0	0	0
1839	2007	0	3.9151	0	0	0	0	0	0	0	0	0	1	1	1	0	0	1	2013/12/31	29.2667	29.2667	29.2667	29.2667	0	0	0	0	0	0	0	0
1840	2001	1	3.9151	0	0	0	0	0	0	0	0	0	0	0	0	0	0	1	2013/12/31	104.367	104.367	104.367	104.367	0	0	0	0	0	0	0	0
1841	2001	1	3.9151	0	0	0	0	0	0	0	0	0	0	0	0	0	0	1	2013/12/31	106.367	106.367	106.367	106.367	0	0	0	0	0	0	0	0
1842	2001	1	3.9124	0	0	1	0	0	1	1	1	1	0	0	0	0	0	1	2013/12/31	106.467	106.467	106.467	106.467	0	0	0	0	0	0	0	0
1843	2007	1	3.9097	0	0	0	0	0	0	0	0	0	0	0	0	0	0	0	2013/12/31	33.4667	33.4667	33.4667	33.4667	0	0	0	0	0	0	0	0
1844	2007	1	3.9097	0	0	0	0	0	0	0	0	0	0	0	0	0	0	1	2013/12/31	33.5	33.5	33.5	33.5	0	0	0	0	0	0	0	0
1845	1999	0	3.9097	0	0	1	0	0	1	1	1	0	0	0	0	0	0	0	2013/12/31	129.767	129.767	129.767	129.767	0	0	0	0	0	0	0	0
1846	1999	1	3.9097	0	0	0	0	0	0	0	0	0	0	0	0	0	0	1	2013/12/31	129.9	129.9	129.9	129.9	0	0	0	0	0	0	0	0
1847	1996	0	3.9097	0	0	0	0	0	0	0	0	0	0	0	0	0	0	1	2013/12/31	164.167	164.167	164.167	164.167	0	0	0	0	0	0	0	0
1848	1996	0	3.9097	0	0	0	0	0	0	0	0	0	0	0	0	0	0	0	2013/12/31	164.367	164.367	164.367	164.367	0	0	0	0	0	0	0	0
1849	2006	0	3.9042	0	0	0	0	0	0	0	0	0	0	0	0	0	0	1	2013/12/31	44.2333	44.2333	44.2333	44.2333	0	0	0	0	0	0	0	0
1850	2006	1	3.9042	0	0	0	0	0	0	0	0	0	0	0	0	0	0	0	2013/12/31	44.6333	44.6333	44.6333	44.6333	0	0	0	0	0	0	0	0
1851	2004	0	3.9042	0	0	0	0	0	0	0	0	0	0	0	0	0	0	1	2013/12/31	70.6333	70.6333	70.6333	70.6333	0	0	0	0	0	0	0	0
1852	2003	1	3.9042	0	0	0	0	0	0	0	0	0	0	0	0	0	0	1	2013/12/31	74.9333	74.9333	74.9333	74.9333	0	0	0	0	0	0	0	0
1853	2003	0	3.9042	0	0	0	0	0	0	0	0	0	1	0	0	0	1	0	2013/12/31	75.1	75.1	75.1	75.1	0	0	0	0	0	0	0	0
1854	2003	1	3.9042	0	0	0	0	0	1	0	0	1	0	0	0	0	0	0	2013/12/31	75.1333	75.1333	75.1333	75.1333	0	0	0	0	0	0	0	0
1855	2003	1	3.9042	0	0	0	0	0	0	0	0	0	0	0	0	0	0	0	2013/12/31	75.2	75.2	75.2	75.2	0	0	0	0	0	0	0	0
1856	2001	1	3.9042	0	0	1	0	0	1	0	1	1	1	0	0	0	1	1	2013/12/31	107.433	107.433	107.433	107.433	0	0	0	0	0	0	0	0
1857	1996	0	3.9042	0	0	0	0	0	0	0	0	0	0	0	0	0	0	1	2013/12/31	168.367	168.367	168.367	168.367	0	0	0	0	0	0	0	0
1858	1996	0	3.9042	0	0	0	0	0	1	1	0	0	0	0	0	0	0	0	2013/12/31	168.467	168.467	168.467	168.467	0	0	0	0	0	0	0	0
1859	1997	0	3.9014	0	0	0	0	0	0	0	0	0	0	0	0	0	0	1	2013/12/31	152.133	152.133	152.133	152.133	0	0	0	0	0	0	0	0
1860	1997	1	3.9014	0	0	0	0	0	0	0	0	0	0	0	0	0	0	0	2013/12/31	152.267	152.267	152.267	152.267	0	0	0	0	0	0	0	0
1861	2004	0	3.8987	0	0	0	0	0	0	0	0	0	1	1	1	0	0	0	2013/12/31	0.1667	0.1667	70.1	70.1	0	0	0	0	0	0	0	0
1862	2005	0	3.8987	0	0	0	0	0	0	0	0	0	0	0	0	0	0	1	2013/12/31	50.8	50.8	50.8	50.8	0	0	0	0	0	0	0	0
1863	2004	1	3.8987	0	0	0	0	0	0	0	0	0	0	0	0	0	0	1	2013/12/31	70.1333	70.1333	70.1333	70.1333	0	0	0	0	0	0	0	0
1864	1997	0	3.8987	0	0	0	0	0	0	0	0	0	0	0	0	0	0	1	2013/12/31	156.367	156.367	156.367	156.367	0	0	0	0	0	0	0	0
1865	1997	0	3.8987	0	0	0	0	0	0	0	0	0	0	0	0	0	0	0	2013/12/31	156.4	156.4	156.4	156.4	0	0	0	0	0	0	0	0
1866	2007	1	3.896	0	0	0	0	0	0	0	0	0	0	0	0	0	0	1	2013/12/31	28.6	28.6	28.6	28.6	0	0	0	0	0	0	0	0
1867	2008	1	3.8932	0	0	0	0	0	1	1	1	0	0	0	0	0	0	1	2013/12/31	25.1667	25.1667	25.1667	25.1667	0	0	0	0	0	0	0	0
1868	1999	1	3.8932	0	0	0	0	0	0	0	0	0	1	1	1	0	0	1	2013/12/31	133.8	133.8	133.8	133.8	0	0	0	0	0	0	0	0
1869	2006	0	3.8905	0	0	0	0	0	0	0	0	0	0	0	0	0	0	0	2013/12/31	38.8	38.8	38.8	38.8	0	0	0	0	0	0	0	0
1870	2007	1	3.8877	0	0	0	0	0	0	0	0	0	0	0	0	0	0	1	2013/12/31	29.6	29.6	29.6	29.6	0	0	0	0	0	0	0	0
1871	2007	1	3.8823	0	0	0	0	0	1	1	0	1	0	0	0	0	0	0	2013/12/31	27.7	27.7	27.7	27.7	0	0	0	0	0	0	0	0
1872	2007	1	3.8823	0	0	0	0	0	0	0	0	0	0	0	0	0	0	1	2013/12/31	27.7	27.7	27.7	27.7	0	0	0	0	0	0	0	0
1873	2005	0	3.8823	0	0	0	0	0	0	0	0	0	0	0	0	0	0	1	2013/12/31	53.9	53.9	53.9	53.9	0	0	0	0	0	0	0	0
1874	2004	1	3.8823	0	0	0	0	0	0	0	0	0	1	1	1	0	0	1	2013/12/31	68.3	68.3	68.3	68.3	0	0	0	0	0	0	0	0
1875	1996	1	3.8823	0	0	0	0	0	0	0	0	0	0	0	0	0	0	1	2013/12/31	162.6	162.6	162.6	162.6	0	0	0	0	0	0	0	0
1876	1996	1	3.8823	0	0	0	0	0	0	0	0	0	0	0	0	0	0	0	2013/12/31	162.667	162.667	162.667	162.667	0	0	0	0	0	0	0	0
1877	2006	1	3.8795	0	0	0	0	0	0	0	0	0	0	0	0	0	0	1	2013/12/31	44.9333	44.9333	44.9333	44.9333	0	0	0	0	0	0	0	0
1878	2006	0	3.8795	0	0	0	0	0	0	0	0	0	1	1	1	1	0	0	2013/12/31	45.0333	45.0333	45.0333	45.0333	0	0	0	0	0	0	0	0
1879	1999	1	3.8795	0	0	0	0	0	1	1	1	0	0	0	0	0	0	1	2013/12/31	126.167	126.167	126.167	126.167	0	0	0	0	0	0	0	0
1880	1999	1	3.8795	0	0	0	0	0	0	0	0	0	1	1	0	1	0	0	2013/12/31	126.2	126.2	126.2	126.2	0	0	0	0	0	0	0	0
1881	1997	1	3.8795	0	0	0	0	0	0	0	0	0	0	0	0	0	0	0	2013/12/31	148.433	148.433	148.433	148.433	0	0	0	0	0	0	0	0
1882	2006	1	3.8768	0	0	0	0	0	0	0	0	0	0	0	0	0	0	1	2013/12/31	46.9667	46.9667	46.9667	46.9667	0	0	0	0	0	0	0	0
1883	1999	1	3.8768	0	0	0	0	0	0	0	0	0	1	1	0	1	0	0	2013/12/31	130.167	130.167	130.167	130.167	0	0	0	0	0	0	0	0
1884	1999	0	3.8768	0	0	0	0	0	0	0	0	0	0	0	0	0	0	1	2013/12/31	130.2	130.2	130.2	130.2	0	0	0	0	0	0	0	0
1885	1999	1	3.8768	0	0	0	0	0	1	0	0	1	1	1	1	0	0	0	2013/12/31	130.267	130.267	130.267	130.267	0	0	0	0	0	0	0	0
1886	2006	0	3.8713	0	0	0	0	0	0	0	0	0	0	0	0	0	0	1	2013/12/31	39	39	39	39	0	0	0	0	0	0	0	0
1887	2005	1	3.8713	0	0	0	0	0	1	1	0	0	0	0	0	0	0	1	2013/12/31	60.3667	60.3667	60.3667	60.3667	0	0	0	0	0	0	0	0
1888	2003	0	3.8686	0	0	0	0	0	0	0	0	0	0	0	0	0	0	1	2013/12/31	83.6667	83.6667	83.6667	83.6667	0	0	0	0	0	0	0	0
1889	2003	1	3.8686	0	0	0	0	0	0	0	0	0	0	0	0	0	0	1	2013/12/31	85.6	85.6	85.6	85.6	0	0	0	0	0	0	0	0
1890	2000	1	3.8686	0	0	0	0	0	1	1	0	0	1	0	0	0	1	1	2013/12/31	121.167	121.167	121.167	121.167	0	0	0	0	0	0	0	0
1891	1997	0	3.8686	0	0	0	0	0	0	0	0	0	0	0	0	0	0	1	2013/12/31	156.733	156.733	156.733	156.733	0	0	0	0	0	0	0	0
1892	2007	0	3.8631	0	0	0	0	0	0	0	0	0	1	1	1	0	0	1	2013/12/31	36.9	36.9	36.9	36.9	0	0	0	0	0	0	0	0
1893	2001	1	3.8631	0	0	0	0	0	0	0	0	0	0	0	0	0	0	1	2013/12/31	102.833	102.833	102.833	102.833	0	0	0	0	0	0	0	0
1894	2001	0	3.8631	0	0	0	0	0	0	0	0	0	0	0	0	0	0	0	2013/12/31	102.933	102.933	102.933	102.933	0	0	0	0	0	0	0	0
1895	2001	1	3.8631	0	0	0	0	0	0	0	0	0	0	0	0	0	0	1	2013/12/31	106	106	106	106	0	0	0	0	0	0	0	0
1896	1997	0	3.8631	0	0	0	0	0	1	1	0	0	0	0	0	0	0	1	2013/12/31	152.633	152.633	152.633	152.633	0	0	0	0	0	0	0	0
1897	1997	0	3.8631	0	0	0	0	0	0	0	0	0	0	0	0	0	0	0	2013/12/31	152.733	152.733	152.733	152.733	0	0	0	0	0	0	0	0
1898	2004	1	3.8604	0	0	0	0	0	0	0	0	0	0	0	0	0	0	1	2013/12/31	64.4333	64.4333	64.4333	64.4333	0	0	0	0	0	0	0	0
1899	1998	1	3.8604	0	0	0	0	0	0	0	0	0	0	0	0	0	0	0	2013/12/31	137.567	137.567	137.567	137.567	0	0	0	0	0	0	0	0
1900	1998	0	3.8604	0	0	0	0	0	0	0	0	0	0	0	0	0	0	1	2013/12/31	137.567	137.567	137.567	137.567	0	0	0	0	0	0	0	0
1901	2007	0	3.8576	0	0	0	0	0	0	0	0	0	0	0	0	0	0	1	2013/12/31	38.0667	38.0667	38.0667	38.0667	0	0	0	0	0	0	0	0
1902	2006	1	3.8549	0	0	0	0	0	0	0	0	0	0	0	0	0	0	1	2013/12/31	49.3	49.3	49.3	49.3	0	0	0	0	0	0	0	0
1903	2000	1	3.8549	0	0	0	0	0	0	0	0	0	1	1	1	0	0	1	2013/12/31	116.067	116.067	116.067	116.067	0	0	0	0	0	0	0	0
1904	1998	1	3.8549	0	0	0	0	0	0	0	0	0	0	0	0	0	0	1	2013/12/31	137.467	137.467	137.467	137.467	0	0	0	0	0	0	0	0
1905	1998	1	3.8549	0	0	0	0	0	1	1	0	0	0	0	0	0	0	0	2013/12/31	137.633	137.633	137.633	137.633	0	0	0	0	0	0	0	0
1906	1998	1	3.8549	0	0	0	0	0	0	0	0	0	0	0	0	0	0	0	2013/12/31	137.667	137.667	137.667	137.667	0	0	0	0	0	0	0	0
1907	2008	0	3.8522	0	0	0	0	0	0	0	0	0	0	0	0	0	0	1	2013/12/31	16.5333	16.5333	16.5333	16.5333	0	0	0	0	0	0	0	0
1908	2007	1	3.8494	0	0	0	0	0	0	0	0	0	0	0	0	0	0	0	2013/12/31	34.1667	34.1667	34.1667	34.1667	0	0	0	0	0	0	0	0
1909	2007	0	3.8494	0	0	0	0	0	1	1	0	0	1	1	1	0	0	0	2013/12/31	34.2	34.2	34.2	34.2	0	0	0	0	0	0	0	0
1910	2007	0	3.8494	0	0	0	0	0	0	0	0	0	0	0	0	0	0	1	2013/12/31	34.2333	34.2333	34.2333	34.2333	0	0	0	0	0	0	0	0
1911	2007	0	3.8494	0	0	0	0	0	0	0	0	0	0	0	0	0	0	0	2013/12/31	34.2667	34.2667	34.2667	34.2667	0	0	0	0	0	0	0	0
1912	2001	0	3.8494	0	0	0	0	0	0	0	0	0	0	0	0	0	0	1	2013/12/31	100.967	100.967	100.967	100.967	0	0	0	0	0	0	0	0
1913	2001	1	3.8494	0	0	0	0	0	0	0	0	0	0	0	0	0	0	0	2013/12/31	101.167	101.167	101.167	101.167	0	0	0	0	0	0	0	0
1914	1996	1	3.8494	0	0	0	0	0	0	0	0	0	1	1	0	1	0	1	2013/12/31	170	170	170	170	0	0	0	0	0	0	0	0
1915	2004	0	3.8467	0	0	0	0	0	1	0	0	1	1	1	0	1	0	0	2013/12/31	67.4667	67.4667	67.4667	67.4667	0	0	0	0	0	0	0	0
1916	2004	1	3.8467	0	0	0	0	0	1	1	0	1	0	0	0	0	0	1	2013/12/31	67.5667	67.5667	67.5667	67.5667	0	0	0	0	0	0	0	0
1917	2004	1	3.8467	0	0	0	0	0	0	0	0	0	0	0	0	0	0	0	2013/12/31	67.7	67.7	67.7	67.7	0	0	0	0	0	0	0	0
1918	2000	1	3.8439	0	0	0	0	0	1	1	0	0	0	0	0	0	0	1	2013/12/31	119.333	119.333	119.333	119.333	0	0	0	0	0	0	0	0
1919	2008	1	3.8412	0	0	0	0	0	1	0	1	1	0	0	0	0	0	1	2013/12/31	20.9667	20.9667	20.9667	20.9667	0	0	0	0	0	0	0	0
1920	2008	0	3.8412	0	0	0	0	0	0	0	0	0	1	1	1	0	0	0	2013/12/31	21.0333	21.0333	21.0333	21.0333	0	0	0	0	0	0	0	0
1921	2008	1	3.8412	0	0	1	0	0	1	0	0	1	0	0	0	0	0	0	2013/12/31	21.1667	21.1667	21.1667	21.1667	0	0	0	0	0	0	0	0
1922	2000	1	3.8412	0	0	1	0	0	1	1	1	1	0	0	0	0	0	1	2013/12/31	116.433	116.433	116.433	116.433	0	0	0	0	0	0	0	0
1923	2008	1	3.8385	0	0	0	0	0	0	0	0	0	0	0	0	0	0	0	2013/12/31	19.1333	19.1333	19.1333	19.1333	0	0	0	0	0	0	0	0
1924	2006	1	3.8357	0	0	0	0	0	0	0	0	0	1	1	0	1	1	1	2013/12/31	40.3667	40.3667	40.3667	40.3667	0	0	0	0	0	0	0	0
1925	2006	0	3.8357	0	0	0	0	0	1	0	1	1	0	0	0	0	0	1	2013/12/31	45.4	45.4	45.4	45.4	0	0	0	0	0	0	0	0
1926	1998	1	3.833	0	0	1	0	0	0	0	0	0	1	0	0	0	1	1	2013/12/31	4	141.867	141.867	4	1	0	0	1	1	0	0	1
1927	1999	0	3.833	0	0	0	0	0	1	1	0	0	0	0	0	0	0	1	2013/12/31	128.6	128.6	128.6	128.6	0	0	0	0	0	0	0	0
1928	1998	1	3.833	0	0	0	0	0	0	0	0	0	0	0	0	0	0	0	2013/12/31	141.933	141.933	141.933	141.933	0	0	0	0	0	0	0	0
1929	1998	0	3.833	0	0	0	0	0	1	0	0	1	0	0	0	0	0	0	2013/12/31	141.967	141.967	141.967	141.967	0	0	0	0	0	0	0	0
1930	1998	0	3.833	0	0	0	0	0	0	0	0	0	0	0	0	0	0	0	2013/12/31	141.967	141.967	141.967	141.967	0	0	0	0	0	0	0	0
1931	1998	0	3.833	0	0	0	0	0	0	0	0	0	1	1	1	1	0	0	2013/12/31	142	142	142	142	0	0	0	0	0	0	0	0
1932	1998	0	3.833	0	0	0	0	0	0	0	0	0	0	0	0	0	0	0	2013/12/31	142	142	142	142	0	0	0	0	0	0	0	0
1933	1998	0	3.833	0	0	0	0	0	0	0	0	0	0	0	0	0	0	0	2013/12/31	142	142	142	142	0	0	0	0	0	0	0	0
1934	1997	0	3.833	0	0	0	0	0	0	0	0	0	0	0	0	0	0	1	2013/12/31	153.967	153.967	153.967	153.967	0	0	0	0	0	0	0	0
1935	1997	0	3.8303	0	0	0	0	0	0	0	0	0	0	0	0	0	0	1	2013/12/31	0.0333	155.267	0.0333	155.267	0	0	0	0	0	0	0	0
1936	2003	1	3.8303	0	0	0	0	0	1	1	1	0	1	1	1	0	0	1	2013/12/31	83.9667	83.9667	83.9667	83.9667	0	0	0	0	0	0	0	0
1937	1997	0	3.8303	0	0	0	0	0	0	0	0	0	0	0	0	0	0	0	2013/12/31	155.1	155.1	155.1	155.1	0	0	0	0	0	0	0	0
1938	1997	1	3.8303	0	0	0	0	0	1	0	1	0	1	1	1	0	0	0	2013/12/31	155.167	155.167	155.167	155.167	0	0	0	0	0	0	0	0
1939	2003	0	3.8275	0	0	0	0	0	1	1	0	0	0	0	0	0	0	0	2013/12/31	0.8667	0.8667	8.6667	78.0667	0	0	1	0	1	1	1	0
1940	2003	1	3.8275	0	0	0	0	0	1	1	0	1	0	0	0	0	0	1	2013/12/31	77.9667	77.9667	77.9667	77.9667	0	0	0	0	0	0	0	0
1941	2003	1	3.8275	0	0	0	0	0	0	0	0	0	0	0	0	0	0	0	2013/12/31	78.0667	78.0667	78.0667	78.0667	0	0	0	0	0	0	0	0
1942	1999	0	3.8275	0	0	0	0	0	1	0	0	1	0	0	0	0	0	1	2013/12/31	127.8	127.8	127.8	127.8	0	0	0	0	0	0	0	0
1943	1996	1	3.8248	0	0	0	0	0	0	0	0	0	0	0	0	0	0	1	2013/12/31	164.267	164.267	164.267	164.267	0	0	0	0	0	0	0	0
1944	1996	1	3.8248	0	0	0	0	0	0	0	0	0	0	0	0	0	0	0	2013/12/31	164.4	164.4	164.4	164.4	0	0	0	0	0	0	0	0
1945	2000	0	3.822	0	0	0	0	0	0	0	0	0	0	0	0	0	0	1	2010/09/20	78.7667	78.7667	78.7667	78.7667	0	0	0	0	0	0	0	0
1946	2002	1	3.822	0	0	0	0	0	0	0	0	0	1	1	1	0	0	1	2013/12/31	94.3667	94.3667	94.3667	94.3667	0	0	0	0	0	0	0	0
1947	2002	1	3.822	0	0	0	0	0	1	0	1	0	0	0	0	0	0	0	2013/12/31	94.4333	94.4333	94.4333	94.4333	0	0	0	0	0	0	0	0
1948	2000	0	3.822	0	0	0	0	0	0	0	0	0	0	0	0	0	0	1	2013/12/31	113.7	113.7	113.7	113.7	0	0	0	0	0	0	0	0
1949	2000	1	3.822	0	0	0	0	0	1	0	1	0	0	0	0	0	0	0	2013/12/31	118.8	118.8	118.8	118.8	0	0	0	0	0	0	0	0
1950	1998	0	3.822	0	0	0	0	0	0	0	0	0	0	0	0	0	0	1	2013/12/31	136.967	136.967	136.967	136.967	0	0	0	0	0	0	0	0
1951	1998	1	3.822	0	0	0	0	0	0	0	0	0	1	1	1	0	0	0	2013/12/31	137	137	137	137	0	0	0	0	0	0	0	0
1952	2001	0	3.8193	0	0	0	0	0	1	1	1	0	0	0	0	0	0	0	2013/12/31	8.3	11.9	8.3	103.533	1	1	1	0	1	1	1	0
1953	1998	0	3.8193	0	0	0	0	0	1	1	0	0	1	1	1	0	0	0	2013/12/31	9.2667	9.2667	142.133	142.133	1	1	0	0	1	1	0	0
1954	2009	1	3.8193	0	0	0	0	0	0	0	0	0	0	0	0	0	0	1	2013/12/31	13.1667	13.1667	13.1667	13.1667	0	0	0	0	0	0	0	0
1955	2006	0	3.8193	0	0	0	0	0	0	0	0	0	0	0	0	0	0	1	2013/12/31	45.5667	45.5667	45.5667	45.5667	0	0	0	0	0	0	0	0
1956	2006	0	3.8193	0	0	0	0	0	0	0	0	0	0	0	0	0	0	1	2013/12/31	45.7333	45.7333	45.7333	45.7333	0	0	0	0	0	0	0	0
1957	2001	1	3.8193	0	0	0	0	0	0	0	0	0	0	0	0	0	0	1	2013/12/31	103.1	103.1	103.1	103.1	0	0	0	0	0	0	0	0
1958	1998	1	3.8193	0	0	0	0	0	0	0	0	0	0	0	0	0	0	1	2013/12/31	141.867	141.867	141.867	141.867	0	0	0	0	0	0	0	0
1959	1999	1	3.8166	0	0	0	0	0	0	0	0	0	0	0	0	0	0	0	2013/12/31	126.833	126.833	126.833	126.833	0	0	0	0	0	0	0	0
1960	1999	1	3.8166	0	0	0	0	0	1	0	1	0	0	0	0	0	0	1	2013/12/31	126.9	126.9	126.9	126.9	0	0	0	0	0	0	0	0
1961	2001	0	3.8138	0	0	0	0	0	0	0	0	0	1	1	1	1	0	1	2008/03/24	40.2	40.2	40.2	40.2	0	0	0	0	0	0	0	0
1962	2002	1	3.8138	0	0	0	0	0	1	1	0	0	1	1	1	0	0	1	2013/12/31	96.5	96.5	96.5	96.5	0	0	0	0	0	0	0	0
1963	2001	0	3.8138	0	0	0	0	0	0	0	0	0	0	0	0	0	0	0	2013/12/31	110.7	110.7	110.7	110.7	0	0	0	0	0	0	0	0
1964	2001	1	3.8111	0	0	0	0	0	1	1	1	0	1	1	1	0	0	0	2013/12/31	1.9667	1.9667	6.9	4.3333	1	1	1	1	1	1	1	1
1965	2008	1	3.8111	0	0	0	0	0	0	0	0	0	1	1	1	0	0	1	2013/12/31	21.2333	21.2333	21.2333	21.2333	0	0	0	0	0	0	0	0
1966	2008	1	3.8111	0	0	0	0	0	0	0	0	0	0	0	0	0	0	0	2013/12/31	21.4667	21.4667	21.4667	21.4667	0	0	0	0	0	0	0	0
1967	2008	0	3.8111	0	0	0	0	0	0	0	0	0	0	0	0	0	0	0	2013/12/31	21.4667	21.4667	21.4667	21.4667	0	0	0	0	0	0	0	0
1968	2008	1	3.8111	0	0	0	0	0	0	0	0	0	0	0	0	0	0	0	2013/12/31	21.5333	21.5333	21.5333	21.5333	0	0	0	0	0	0	0	0
1969	2004	0	3.8111	0	0	0	0	0	0	0	0	0	0	0	0	0	0	1	2013/12/31	72.0667	72.0667	72.0667	72.0667	0	0	0	0	0	0	0	0
1970	2004	0	3.8111	0	0	0	0	0	1	1	1	0	0	0	0	0	0	0	2013/12/31	72.2	72.2	72.2	72.2	0	0	0	0	0	0	0	0
1971	2004	0	3.8111	0	0	0	0	0	0	0	0	0	0	0	0	0	0	0	2013/12/31	72.2	72.2	72.2	72.2	0	0	0	0	0	0	0	0
1972	2002	0	3.8111	0	0	0	0	0	1	0	0	1	0	0	0	0	0	1	2013/12/31	90.5	90.5	90.5	90.5	0	0	0	0	0	0	0	0
1973	2002	0	3.8111	0	0	0	0	0	0	0	0	0	0	0	0	0	0	1	2013/12/31	94.3667	94.3667	94.3667	94.3667	0	0	0	0	0	0	0	0
1974	2001	1	3.8111	0	0	0	0	0	0	0	0	0	1	1	1	0	0	1	2013/12/31	102.6	102.6	102.6	102.6	0	0	0	0	0	0	0	0
1975	2001	0	3.8111	0	0	0	0	0	1	0	0	1	0	0	0	0	0	0	2013/12/31	102.7	102.7	102.7	102.7	0	0	0	0	0	0	0	0
1976	2001	1	3.8111	0	0	0	0	0	0	0	0	0	0	0	0	0	0	1	2013/12/31	109.567	109.567	109.567	109.567	0	0	0	0	0	0	0	0
1977	2001	1	3.8111	0	0	0	0	0	0	0	0	0	1	1	1	1	0	0	2013/12/31	109.667	109.667	109.667	109.667	0	0	0	0	0	0	0	0
1978	2001	0	3.8111	0	0	0	0	0	0	0	0	0	0	0	0	0	0	0	2013/12/31	109.667	109.667	109.667	109.667	0	0	0	0	0	0	0	0
1979	2001	1	3.8111	0	0	0	0	0	0	0	0	0	0	0	0	0	0	0	2013/12/31	109.8	109.8	109.8	109.8	0	0	0	0	0	0	0	0
1980	2000	1	3.8111	0	0	0	0	0	1	1	0	0	0	0	0	0	0	1	2013/12/31	117.7	117.7	117.7	117.7	0	0	0	0	0	0	0	0
1981	1999	1	3.8111	0	0	0	0	0	0	0	0	0	0	0	0	0	0	1	2013/12/31	127.3	127.3	127.3	127.3	0	0	0	0	0	0	0	0
1982	2007	0	3.8084	0	0	0	0	0	0	0	0	0	0	0	0	0	0	0	2013/12/31	32.7	32.7	32.7	32.7	0	0	0	0	0	0	0	0
1983	2001	0	3.8084	0	0	0	0	0	0	0	0	0	0	0	0	0	0	0	2013/12/31	103.567	103.567	103.567	103.567	0	0	0	0	0	0	0	0
1984	2001	1	3.8084	0	0	0	0	0	0	0	0	0	1	1	1	0	0	1	2013/12/31	103.567	103.567	103.567	103.567	0	0	0	0	0	0	0	0
1985	2001	1	3.8084	0	0	0	0	0	0	0	0	0	0	0	0	0	0	0	2013/12/31	103.633	103.633	103.633	103.633	0	0	0	0	0	0	0	0
1986	2002	1	3.8056	0	0	1	0	0	1	0	1	1	1	1	1	0	0	1	2013/12/31	96.5667	96.5667	96.5667	96.5667	0	0	0	0	0	0	0	0
1987	2002	1	3.8056	0	0	0	0	0	0	0	0	0	0	0	0	0	0	0	2013/12/31	96.7333	96.7333	96.7333	96.7333	0	0	0	0	0	0	0	0
1988	2000	1	3.8056	0	0	0	0	0	1	1	0	0	0	0	0	0	0	1	2013/12/31	115.867	115.867	115.867	115.867	0	0	0	0	0	0	0	0
1989	2000	1	3.8056	0	0	1	0	0	1	1	0	0	0	0	0	0	0	0	2013/12/31	115.933	115.933	115.933	115.933	0	0	0	0	0	0	0	0
1990	1996	1	3.8056	0	0	0	0	0	0	0	0	0	0	0	0	0	0	1	2013/12/31	172.567	172.567	172.567	172.567	0	0	0	0	0	0	0	0
1991	1996	1	3.8056	0	0	0	0	0	0	0	0	0	0	0	0	0	0	0	2013/12/31	172.633	172.633	172.633	172.633	0	0	0	0	0	0	0	0
1992	2007	1	3.8029	0	0	0	0	0	0	0	0	0	1	1	1	0	0	1	2013/12/31	34.6667	34.6667	34.6667	34.6667	0	0	0	0	0	0	0	0
1993	1996	1	3.7947	0	0	0	0	0	0	0	0	0	1	1	0	1	0	1	2013/12/31	6.9333	165.567	165.567	6.9333	1	0	0	1	1	0	0	1
1994	2003	1	3.7947	0	0	0	0	0	0	0	0	0	0	0	0	0	0	1	2013/12/31	82.4333	82.4333	82.4333	82.4333	0	0	0	0	0	0	0	0
1995	2000	1	3.7947	0	0	0	0	0	0	0	0	0	0	0	0	0	0	1	2013/12/31	112.933	112.933	112.933	112.933	0	0	0	0	0	0	0	0
1996	2000	1	3.7947	0	0	0	0	0	1	0	1	0	0	0	0	0	0	0	2013/12/31	112.967	112.967	112.967	112.967	0	0	0	0	0	0	0	0
1997	2000	0	3.7947	0	0	0	0	0	0	0	0	0	0	0	0	0	0	0	2013/12/31	112.967	112.967	112.967	112.967	0	0	0	0	0	0	0	0
1998	1996	1	3.7947	0	0	0	0	0	0	0	0	0	0	0	0	0	0	0	2013/12/31	165.3	165.3	165.3	165.3	0	0	0	0	0	0	0	0
1999	1996	0	3.7947	0	0	0	0	0	0	0	0	0	0	0	0	0	0	0	2013/12/31	165.633	165.633	165.633	165.633	0	0	0	0	0	0	0	0
[truncated: 25,395 more rows]
